# Supplementary material for: Practical metal-free synthesis of chalcone derivatives via a tandem cross-dehydrogenative-coupling/elimination reaction
Source: Royal Society of Chemistry journal article supplement (doi:10.1039/c3gc41403e), 2013-01-01

## Supporting Information

# Practical Metal-Free Synthesis of Chalcone Derivatives via a Tandem Cross-Dehydrogenative-Coupling/Elimination Reaction

Yu Wei, Jinghua Tang, Xuefeng Cong and Xiaoming Zeng\*

*Center for Organic Chemistry, Frontier Institute of Science and Technology, Xi'an Jiaotong*

*University, Xi'an, Shaanxi, 710054, P. R. China*

## Table of Contents

|                                                                                    |            |
|------------------------------------------------------------------------------------|------------|
| <b>1. Materials and Methods.....</b>                                               | <b>S2</b>  |
| <b>2. Investigation of the Key Reaction Parameters .....</b>                       | <b>S3</b>  |
| <b>3. General Procedure for Metal-Free Synthesis of Chalcone Derivatives .....</b> | <b>S5</b>  |
| <b>4. Concise Synthesis of Bioactive Cytotoxic Dihydrochalcone 4.....</b>          | <b>S16</b> |
| <b>5. Synthesis of Flavonoid Derivative 5 via a One-Pot Operation .....</b>        | <b>S17</b> |
| <b>6. Synthesis of Compounds 6 and 7 for Mechanistic Studies .....</b>             | <b>S18</b> |
| <b>7. Copies of <sup>1</sup>H and <sup>13</sup>C NMR spectra .....</b>             | <b>S20</b> |

## 1. Materials and Methods

**General.** All reactions were carried out in a flame-dried, sealed Schlenk reaction tube under an atmosphere of nitrogen or air. Analytical thin-layer chromatography was performed on glass plates coated with 0.25 mm 230–400 mesh silica gel containing a fluorescent indicator (Merck). Flash silica gel column chromatography was performed on silica gel 60N (spherical and neutral, 140–325 mesh) as described by Still.<sup>1</sup> NMR spectra were measured on a Bruker AV-400 spectrometer and reported in parts per million. <sup>1</sup>H NMR spectra were recorded at 400 MHz in CDCl<sub>3</sub> were referenced internally to tetramethylsilane as a standard, and <sup>13</sup>C NMR spectra were recorded at 100 MHz and referenced to the solvent resonance. Analytical gas chromatography (GC) was carried out on a Thermo Trace 1300 gas chromatograph, equipped with a flame ionization detector. Mass spectra (GC-MS, LC-MS) were taken at Thermo Trace 1300 gas chromatograph mass spectrometer or Waters TDQ/UPLC H-CLASS-SQ Detector 2. High resolution mass spectra (HRMS) were recorded by ESI-TOF.

**Materials.** Unless otherwise noted, materials were purchased from Tokyo Chemical Industry Co., Aldrich Inc., and other commercial suppliers and used as received. Solvents were dried over CaH<sub>2</sub> (for DCE and DCM) or sodium (for dioxane and THF) by refluxing for overnight and freshly distilled prior to use. *tert*-Amyl-OH was purchased from commercial suppliers and used directly without further purification.

## 2. Investigation of the Key Reaction Parameters

The reactions were performed according to the General Procedure, with the corresponding modifications shown in Table S1-S5. The crude mixture was analyzed by  $^1\text{H}$  NMR using 1,1,2,2-tetrachloroethane as an internal standard.

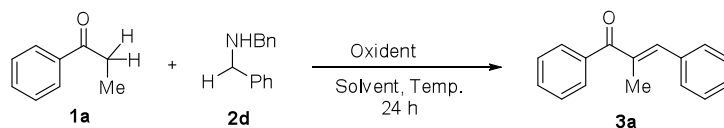

**Table S1:** Investigation of the Effect of Oxidants for the Reaction<sup>a</sup>

| Entry    | Oxidant                                                       | solvent                    | Temp. (°C) | <b>3a</b> (%) <sup>b</sup> |
|----------|---------------------------------------------------------------|----------------------------|------------|----------------------------|
| 1        | DDQ                                                           | <i>tert</i> -Amyl-OH       | 120        | 64                         |
| 2        | DCP                                                           | <i>tert</i> -Amyl-OH       | 120        | -                          |
| 3        | TBHP                                                          | <i>tert</i> -Amyl-OH       | 120        | -                          |
| 4        | Ag <sub>2</sub> CO <sub>3</sub>                               | <i>tert</i> -Amyl-OH       | 120        | -                          |
| 5        | K <sub>2</sub> S <sub>2</sub> O <sub>8</sub>                  | <i>tert</i> -Amyl-OH       | 120        | 81                         |
| 6        | Na <sub>2</sub> S <sub>2</sub> O <sub>8</sub>                 | <i>tert</i> -Amyl-OH       | 120        | 74                         |
| 7        | KHS <sub>2</sub> O <sub>8</sub>                               | <i>tert</i> -Amyl-OH       | 120        | 50                         |
| <b>8</b> | <b>(NH<sub>4</sub>)<sub>2</sub>S<sub>2</sub>O<sub>8</sub></b> | <b><i>tert</i>-Amyl-OH</b> | <b>120</b> | <b>94 (95)<sup>c</sup></b> |

<sup>a</sup> Reaction conditions: **1a** (0.25 mmol), **2d** (1.25 mmol), and oxidant (3.0 equiv) in *tert*-Amyl-OH (0.5 mL) at 120 °C for 24 h. <sup>b</sup>

<sup>1</sup>H NMR yield using 1,1,2,2-tetrachloroethane as an internal standard. <sup>c</sup> Isolated yield in parentheses for 1.0 g scale synthesis.

*tert*-Amyl-OH = *tert*-Amyl alcohol.

**Table S2:** Investigation of the Effect of Solvent for the Reaction<sup>a</sup>

| Entry    | Oxidant                                                       | solvent                    | Temp. (°C) | <b>3a</b> (%) <sup>b</sup> |
|----------|---------------------------------------------------------------|----------------------------|------------|----------------------------|
| <b>1</b> | <b>(NH<sub>4</sub>)<sub>2</sub>S<sub>2</sub>O<sub>8</sub></b> | <b><i>tert</i>-Amyl-OH</b> | <b>120</b> | <b>94 (95)<sup>c</sup></b> |
| 2        | (NH <sub>4</sub> ) <sub>2</sub> S <sub>2</sub> O <sub>8</sub> | MeOH                       | 120        | 46                         |
| 3        | (NH <sub>4</sub> ) <sub>2</sub> S <sub>2</sub> O <sub>8</sub> | <i>i</i> -PrOH             | 120        | 44                         |
| 4        | (NH <sub>4</sub> ) <sub>2</sub> S <sub>2</sub> O <sub>8</sub> | <i>n</i> -BuOH             | 120        | 60                         |
| 5        | (NH <sub>4</sub> ) <sub>2</sub> S <sub>2</sub> O <sub>8</sub> | CH <sub>3</sub> CN         | 120        | 74                         |
| 6        | (NH <sub>4</sub> ) <sub>2</sub> S <sub>2</sub> O <sub>8</sub> | toluene                    | 120        | 71                         |
| 7        | (NH <sub>4</sub> ) <sub>2</sub> S <sub>2</sub> O <sub>8</sub> | THF                        | 120        | 66                         |
| 8        | (NH <sub>4</sub> ) <sub>2</sub> S <sub>2</sub> O <sub>8</sub> | DCM                        | 120        | 75                         |
| 9        | (NH <sub>4</sub> ) <sub>2</sub> S <sub>2</sub> O <sub>8</sub> | DCE                        | 120        | 83                         |
| 10       | (NH <sub>4</sub> ) <sub>2</sub> S <sub>2</sub> O <sub>8</sub> | Pyridine                   | 120        | 68                         |

<sup>a</sup> Reaction conditions: **1a** (0.25 mmol), **2d** (1.25 mmol), and (NH<sub>4</sub>)<sub>2</sub>S<sub>2</sub>O<sub>8</sub> (3.0 equiv) in solvent (0.5 mL) at 120 °C for 24 h. <sup>b</sup>  $^1\text{H}$

NMR yield using 1,1,2,2-tetrachloroethane as an internal standard. <sup>c</sup> Isolated yield in parentheses for 1.0 g scale synthesis.

*tert*-Amyl-OH = *tert*-Amyl alcohol; DCM = dichloromethane; DCE = 1,2-dichloroethane.

**Table S3:** Investigation of the Effect of Temperature for the Reaction<sup>a</sup>

| Entry    | Oxidant                                                       | Solvent                    | Temp. (°C) | <b>3a</b> (%) <sup>b</sup> |
|----------|---------------------------------------------------------------|----------------------------|------------|----------------------------|
| 1        | (NH <sub>4</sub> ) <sub>2</sub> S <sub>2</sub> O <sub>8</sub> | <i>tert</i> -Amyl-OH       | 100        | 86                         |
| 2        | (NH <sub>4</sub> ) <sub>2</sub> S <sub>2</sub> O <sub>8</sub> | <i>tert</i> -Amyl-OH       | 110        | 91                         |
| <b>3</b> | <b>(NH<sub>4</sub>)<sub>2</sub>S<sub>2</sub>O<sub>8</sub></b> | <b><i>tert</i>-Amyl-OH</b> | <b>120</b> | <b>94 (95)<sup>c</sup></b> |
| 4        | (NH <sub>4</sub> ) <sub>2</sub> S <sub>2</sub> O <sub>8</sub> | <i>tert</i> -Amyl-OH       | 130        | 97                         |
| 5        | (NH <sub>4</sub> ) <sub>2</sub> S <sub>2</sub> O <sub>8</sub> | <i>tert</i> -Amyl-OH       | 140        | 88                         |

<sup>a</sup> Reaction conditions: **1a** (0.25 mmol), **2d** (1.25 mmol), and (NH<sub>4</sub>)<sub>2</sub>S<sub>2</sub>O<sub>8</sub> (3.0 equiv) in solvent (0.5 mL) at intend temperature for 24 h. <sup>b</sup> <sup>1</sup>H NMR yield using 1,1,2,2-tetrachloroethane as an internal standard. <sup>c</sup> Isolated yield in parentheses for 1.0 g scale synthesis.

**Table S4:** Investigation of the Effect of the Amount of Dibenzylamine and Oxidant for the Reaction<sup>a</sup>

| Entry    | <b>2d</b> (equiv) | (NH <sub>4</sub> ) <sub>2</sub> S <sub>2</sub> O <sub>8</sub> (equiv) | <b>3a</b> (%) <sup>b</sup> |
|----------|-------------------|-----------------------------------------------------------------------|----------------------------|
| 1        | 2.0               | 3.0                                                                   | Trace                      |
| 2        | 3.0               | 3.0                                                                   | 3                          |
| 3        | 4.0               | 3.0                                                                   | 45                         |
| 4        | 4.5               | 3.0                                                                   | 87                         |
| <b>5</b> | <b>5.0</b>        | <b>3.0</b>                                                            | <b>94 (95)<sup>c</sup></b> |
| 6        | 5.5               | 3.0                                                                   | 93                         |
| 7        | 6.0               | 3.0                                                                   | 77                         |
| 8        | 5.0               | -                                                                     | None                       |
| 9        | 5.0               | 2.0                                                                   | 35                         |
| 10       | 5.0               | 2.5                                                                   | 70                         |
| 11       | 5.0               | 3.5                                                                   | 68                         |
| 12       | 5.0               | 4.0                                                                   | 16                         |

<sup>a</sup> Reaction conditions: **1a** (0.25 mmol), **2d** (1.25 mmol), and (NH<sub>4</sub>)<sub>2</sub>S<sub>2</sub>O<sub>8</sub> (3.0 equiv) in solvent (0.5 mL) at 120 °C for 24 h. <sup>b</sup> <sup>1</sup>H NMR yield using 1,1,2,2-tetrachloroethane as an internal standard. <sup>c</sup> Isolated yield in parentheses for 1.0 g scale synthesis.

**Table S5:** Investigation of the Source of Amines for the Reaction<sup>a</sup>

| Entry | <b>2</b>  | R <sup>1</sup> | R <sup>2</sup> | R <sup>3</sup> | <b>3a</b> (%) <sup>b</sup> |
|-------|-----------|----------------|----------------|----------------|----------------------------|
| 1     | <b>2a</b> | H              | H              | Ph             | 5                          |
| 2     | <b>2b</b> | H              | Me             | Ph             | 83                         |
| 3     | <b>2c</b> | H              | Ph             | Ph             | 7                          |
| 4     | <b>2d</b> | H              | Bn             | Ph             | 94 (95) <sup>c</sup>       |
| 5     | <b>2e</b> | Me             | Me             | Ph             | 11                         |
| 6     | <b>2f</b> | H              | Et             | Me             | -                          |

|   |    |    |    |    |   |
|---|----|----|----|----|---|
| 7 | 2g | Et | Et | Me | - |
|---|----|----|----|----|---|

<sup>a</sup> Reaction conditions: **1a** (0.5 mmol), **2** (2.5 mmol), and (NH<sub>4</sub>)<sub>2</sub>S<sub>2</sub>O<sub>8</sub> (1.5 mmol) in *tert*-Amyl-OH (1.0 mL) at 120 °C for 24 h. <sup>b</sup> <sup>1</sup>H NMR yield using 1,1,2,2-tetrachloroethane as an internal standard. <sup>c</sup> Isolated yield in parentheses for 1.0 g scale synthesis.

### 3. General Procedure for Metal-Free Synthesis of Chalcone Derivatives

#### General Procedure

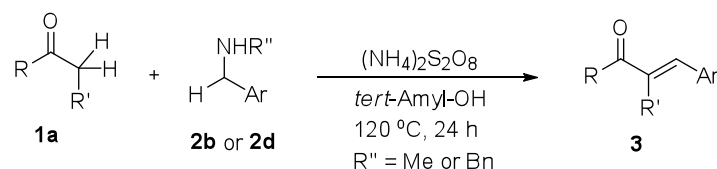

In a dried Schlenk flask were placed with ketone **1** (0.5 mmol), benzylamine **2** (2.5 mmol), (NH<sub>4</sub>)<sub>2</sub>S<sub>2</sub>O<sub>8</sub> (1.5 mmol). Then 1.0 mL of *tert*-Amyl-OH was added with a syringe under nitrogen atmosphere. The resulting mixture was stirred at 120 °C for 24 h. After cooling to room temperature, the reaction mixture was diluted with 5 mL of ethyl acetate and filtered through a plug of celite, followed by with 10.0 mL of ethyl acetate. The combined organic residue was concentrated and then purified by column chromatography on silica gel to give chalcone derivative **3** (using petroleum ether/CH<sub>2</sub>Cl<sub>2</sub> or petroleum ether/ ethyl acetate as mobile phase).

#### 1.0 Gram Scale Synthesis

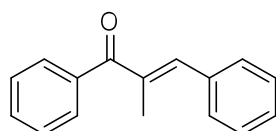

#### (*E*)-2-methyl-1,3-diphenylprop-2-en-1-one (Table 2, **3a**)<sup>2</sup>

The general procedure was applied to propiophenone (1.00 g, 7.46 mmol), dibenzylamine (7.2 mL, 37.3 mmol), and (NH<sub>4</sub>)<sub>2</sub>S<sub>2</sub>O<sub>8</sub> (5.11 g, 22.4 mmol) at 120 °C for 24 h under N<sub>2</sub>. The crude product was purified by column chromatography on silica gel (petroleum ether/CH<sub>2</sub>Cl<sub>2</sub> 10:1~5:1) to afford the title compound as a colorless oil (1.57 g, 95% yield). <sup>1</sup>H NMR (400 MHz, CDCl<sub>3</sub>): δ = 7.74 (d, *J* = 7.6 Hz, 2H), 7.52 (t, *J* = 7.2 Hz, 1H), 7.47-7.38 (m, 6H), 7.34-7.33 (m, 1H), 7.18 (s, 1H), 2.27

(s, 3H);  $^{13}\text{C}$  NMR (100 MHz,  $\text{CDCl}_3$ ):  $\delta$  = 199.6, 142.3, 138.7, 137.0, 136.0, 131.8, 129.8, 129.6, 128.7, 128.6, 128.3, 14.6. GC-MS (EI): calcd for  $\text{C}_{16}\text{H}_{14}\text{O}$  [M] 222.10, found 222.16.

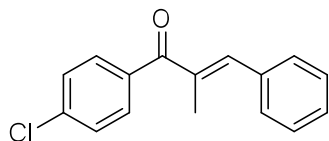

**(E)-1-(4-chlorophenyl)-2-methyl-3-phenylprop-2-en-1-one (Table 2, 3b)**

The general procedure was applied to 1-(4-chlorophenyl)propan-1-one (73  $\mu\text{L}$ , 0.5 mmol), dibenzylamine (480  $\mu\text{L}$ , 2.5 mmol) at 120  $^{\circ}\text{C}$  for 24 h under  $\text{N}_2$ . The crude product was purified by column chromatography on silica gel (petroleum ether/ $\text{CH}_2\text{Cl}_2$  5:1) to afford the title compound as a light yellow solid (113 mg, 88% yield).  $^1\text{H}$  NMR (400 MHz,  $\text{CDCl}_3$ ):  $\delta$  = 7.68 (dt,  $J$  = 9.2, 2.4 Hz, 2H), 7.46-7.41 (m, 6H), 7.37-7.33 (m, 1H), 7.14 (d,  $J$  = 1.2 Hz, 1H), 2.27 (s, 3H);  $^{13}\text{C}$  NMR (100 MHz,  $\text{CDCl}_3$ ) HRMS ( $\text{ESI}^+$ ): calcd for  $\text{C}_{16}\text{H}_{13}\text{ClO}$  [ $\text{M}+\text{Na}$ ] $^+$  279.0553, found 279.0554.

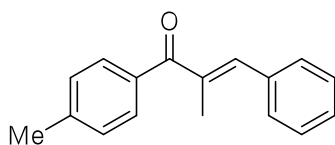

**(E)-2-methyl-3-phenyl-1-(p-tolyl)prop-2-en-1-one (Table 2, 3c)<sup>3</sup>**

The general procedure was applied to 1-(*p*-tolyl)propan-1-one (74  $\mu\text{L}$ , 0.5 mmol), dibenzylamine (480  $\mu\text{L}$ , 2.5 mmol) at 120  $^{\circ}\text{C}$  for 24 h under  $\text{N}_2$ . The crude product was purified by column chromatography on silica gel (petroleum ether/ $\text{CH}_2\text{Cl}_2$  5:1) to afford the title compound as a colorless oil (98 mg, 83% yield).  $^1\text{H}$  NMR (400 MHz,  $\text{CDCl}_3$ ):  $\delta$  = 7.68 (d,  $J$  = 7.2 Hz, 2H), 7.40 (m, 4H), 7.33 (m, 1H), 7.25 (d,  $J$  = 7.2 Hz, 2H), 7.16 (s, 1H), 2.41 (s, 3H), 2.26 (s, 3H);  $^{13}\text{C}$  NMR (100 MHz,  $\text{CDCl}_3$ ):  $\delta$  = 199.3, 142.4, 141.4, 137.0, 135.9, 135.6, 129.8 (2C), 129.7 (2C), 128.9 (2C), 128.5 (3C), 21.6, 14.7. GC-MS (EI): calcd for  $\text{C}_{17}\text{H}_{16}\text{O}$  [M] 236.12, found 236.15.

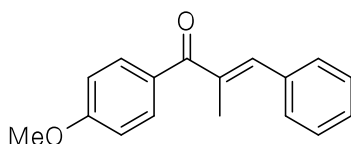

**(E)-1-(4-methoxyphenyl)-2-methyl-3-phenylprop-2-en-1-one (Table 2, 3d)<sup>3</sup>**

The general procedure was applied to 1-(4-methoxyphenyl)propan-1-one (88  $\mu$ L, 0.5 mmol), dibenzylamine (480  $\mu$ L, 2.5 mmol) at 120 °C for 24 h under N<sub>2</sub>. The crude product was purified by column chromatography on silica gel (petroleum ether/CH<sub>2</sub>Cl<sub>2</sub> 5:1) to afford the title compound as a light yellow solid (110 mg, 87% yield). <sup>1</sup>H NMR (400 MHz, CDCl<sub>3</sub>):  $\delta$  = 7.82 (d, *J* = 8.8 Hz, 2H), 7.44-7.39 (m, 4H), 7.35-7.31 (m, 1H), 7.12 (s, 1H), 6.95 (d, *J* = 8.4 Hz, 2H), 3.87 (s, 3H), 2.27 (s, 3H); <sup>13</sup>C NMR (100 MHz, CDCl<sub>3</sub>):  $\delta$  = 198.3, 162.8, 140.1, 137.0, 136.0, 132.0, 130.7, 129.7, 128.5, 128.4, 113.6, 55.5, 15.0. GC-MS (EI): calcd for C<sub>17</sub>H<sub>16</sub>O<sub>2</sub> [M] 252.12, found 252.16.

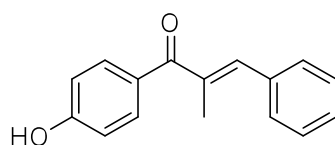

**(*E*)-1-(4-hydroxyphenyl)-2-methyl-3-phenylprop-2-en-1-one (Table 2, 3e)**

The general procedure was applied to 1-(4-hydroxyphenyl)propan-1-one (75 mg, 0.5 mmol), dibenzylamine (480  $\mu$ L, 2.5 mmol) at 120 °C for 24 h under N<sub>2</sub>. The crude product was purified by column chromatography on silica gel (petroleum ether/CH<sub>2</sub>Cl<sub>2</sub> 5:1~5:2) to afford the title compound as a white solid (89 mg, 75% yield). <sup>1</sup>H NMR (400 MHz, CDCl<sub>3</sub>):  $\delta$  = 7.75 (d, *J* = 8.8 Hz, 2H), 7.42-7.39 (m, 4H), 7.36-7.31 (m, 1H), 7.12 (s, 1H), 6.90 (d, *J* = 8.8 Hz, 2H), 6.24 (brs, 1H), 2.26 (s, 3H); <sup>13</sup>C NMR (100 MHz, CDCl<sub>3</sub>):  $\delta$  = 199.1, 159.8, 140.7, 137.0, 136.0, 132.5, 130.7, 129.8, 128.62, 128.59, 115.2, 15.1. HRMS (ESI<sup>+</sup>): calcd for C<sub>16</sub>H<sub>14</sub>O<sub>2</sub> [M+Na]<sup>+</sup> 261.0891, found 261.0900.

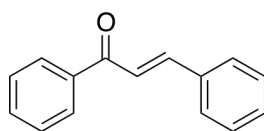

**(*E*)-1,3-diphenylprop-2-en-1-one (Table 2, 3f)<sup>4,5</sup>**

The general procedure was applied to acetophenone (58  $\mu$ L, 0.5 mmol), dibenzylamine (480  $\mu$ L, 2.5 mmol) at 120 °C for 24 h under N<sub>2</sub>. The crude product was purified by column chromatography on silica gel (petroleum ether/CH<sub>2</sub>Cl<sub>2</sub> 10:1 ~ 5:1) to afford the title compound as a light yellow solid (65 mg, 62% yield). <sup>1</sup>H NMR

(400 MHz,  $\text{CDCl}_3$ ):  $\delta$  = 8.02 (d,  $J$  = 7.2 Hz, 2H), 7.80 (d,  $J$  = 16.0 Hz, 1H), 7.67-7.64 (m, 2H), 7.58 (tt,  $J$  = 7.2, 1.2 Hz, 1H), 7.57-7.49 (m, 3H), 7.44-7.41 (m, 3H);  $^{13}\text{C}$  NMR (100 MHz,  $\text{CDCl}_3$ ):  $\delta$  = 190.7, 145.0, 138.4, 135.1, 132.9, 130.7, 129.1, 128.8, 128.7, 128.6, 122.3. GC-MS (EI): calcd for  $\text{C}_{15}\text{H}_{12}\text{O}$  [M] 208.09, found 208.14.

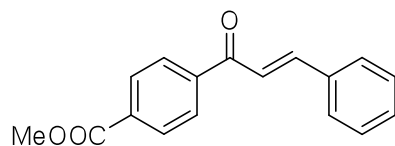

#### Methyl 4-cinnamoylbenzoate (Table 2, 3g)<sup>6</sup>

The general procedure was applied to methyl 4-acetylbenzoate (89 mg, 0.5 mmol), dibenzylamine (480  $\mu\text{L}$ , 2.5 mmol) at 120  $^{\circ}\text{C}$  for 24 h under  $\text{N}_2$ . The crude product was purified by column chromatography on silica gel (petroleum ether/ $\text{CH}_2\text{Cl}_2$  5:1) to afford the title compound as a light yellow solid (60 mg, 43% yield).  $^1\text{H}$  NMR (400 MHz,  $\text{CDCl}_3$ ):  $\delta$  = 8.17 (d,  $J$  = 8.4 Hz, 2H), 8.05 (d,  $J$  = 8.4 Hz, 2H), 7.81 (d,  $J$  = 16.0 Hz, 1H), 7.67-7.65 (m, 2H), 7.49 (d,  $J$  = 15.6 Hz, 1H), 7.45-7.43 (m, 3H), 3.97 (s, 3H);  $^{13}\text{C}$  NMR (100 MHz,  $\text{CDCl}_3$ ):  $\delta$  = 190.3, 166.5, 146.0, 141.9, 134.8, 133.7, 131.0, 130.0, 129.2, 128.7, 128.5, 122.1, 52.6. GC-MS (EI): calcd for  $\text{C}_{17}\text{H}_{14}\text{O}_3$  [M] 266.09, found 266.14.

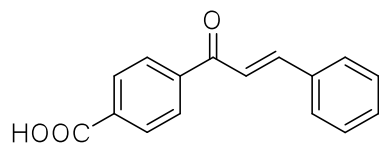

#### 4-Cinnamoylbenzoic acid (Table 2, 3h)<sup>7</sup>

The general procedure was applied to methyl 4-acetylbenzoic acid (82 mg, 0.5 mmol), dibenzylamine (480  $\mu\text{L}$ , 2.5 mmol) at 120  $^{\circ}\text{C}$  for 24 h under  $\text{N}_2$ . The crude product was purified by column chromatography on silica gel (petroleum ether/ $\text{CH}_2\text{Cl}_2$  5:1~5:2) to afford the title compound as a white solid (72 mg, 54% yield).  $^1\text{H}$  NMR (400 MHz,  $\text{CDCl}_3$ ):  $\delta$  = 8.23 (d,  $J$  = 8.4 Hz, 2H), 8.08 (d,  $J$  = 8.4 Hz, 2H), 7.82 (d,  $J$  = 15.6 Hz, 1H), 7.68-7.65 (m, 2H), 7.50 (d,  $J$  = 15.6 Hz, 1H), 7.45-7.44 (m, 3H);  $^{13}\text{C}$  NMR (100 MHz,  $\text{DMSO}-d_6$ ):  $\delta$  = 194.2, 171.9, 150.0, 146.0, 139.7, 139.6, 136.1, 134.8, 134.3, 134.2, 133.9, 127.2. GC-MS (EI): calcd for  $\text{C}_{16}\text{H}_{12}\text{O}_3$  [M] 252.08, found 252.16.

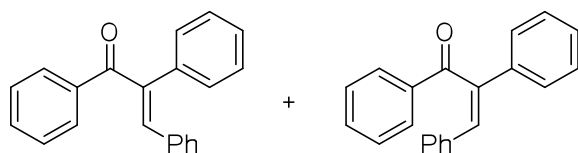

### 1,2,3-Triphenylprop-2-en-1-one (Table 2, **3i** and **3i'**)<sup>8</sup>

The general procedure was applied to 1,2-diphenylethanone (91  $\mu$ L, 0.5 mmol), dibenzylamine (480  $\mu$ L, 2.5 mmol) at 120  $^{\circ}$ C for 24 h under  $N_2$ . The crude product was analyzed by GC-MS using tridecane as an internal standard to get the stereoisomeric ratio (**3i** : **3i'** = 4:1). Then, it was purified by column chromatography on silica gel (petroleum ether/ $CH_2Cl_2$  5:2) to afford the product as a white solid (**3i**: 27 mg, 19% yield; **3i'**: 7 mg, 5% yield.). **3i**:  $\delta$  = 7.86 (dd,  $J$  = 7.2, 1.6 Hz, 2H), 7.54 (t,  $J$  = 4.4 Hz, 1H), 7.44 (t,  $J$  = 7.2 Hz, 2H), 7.35-7.32 (m, 3H), 7.29-7.28 (m, 2H), 7.23-7.16 (m, 4H), 7.09 (dd,  $J$  = 7.2, 1.6 Hz, 2H);  $^{13}C$  NMR (100 MHz,  $CDCl_3$ ):  $\delta$  = 197.7, 140.8, 140.2, 138.2, 136.5, 134.8, 132.2, 130.4, 129.8, 129.7, 129.0, 128.8, 128.32, 128.29, 127.9. **3i'**:  $^1H$  NMR (400 MHz,  $CDCl_3$ ):  $^1H$  NMR (400 MHz,  $CDCl_3$ ):  $\delta$  = 8.00 (dd,  $J$  = 7.2, 1.2 Hz, 2H), 7.45-7.47 (m, 3H), 7.37-7.33 (m, 4H), 7.31-7.28 (m, 3H), 7.20-7.15 (m, 4H);  $^{13}C$  NMR (100 MHz,  $CDCl_3$ ):  $\delta$  = 199.4, 140.9, 138.0, 136.4, 135.4, 133.7, 130.2, 129.7, 128.9, 128.8, 128.7, 128.5, 128.2, 128.1, 126.4. GC-MS (EI): calcd for  $C_{21}H_{16}O$  [M] 284.12, found 284.18. GC-MS (EI): calcd for  $C_{21}H_{16}O$  [M] 284.12, found 284.17.

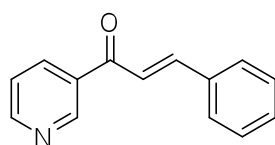

### (*E*)-3-phenyl-1-(pyridin-3-yl)prop-2-en-1-one (Table 2, **3j**)<sup>9</sup>

The general procedure was applied to 1-(pyridin-3-yl)ethanone (55 mg, 0.5 mmol), dibenzylamine (480  $\mu$ L, 2.5 mmol) at 120  $^{\circ}$ C for 24 h under  $N_2$ . The crude product was purified by column chromatography on silica gel (petroleum ether/ ethyl acetate 10:1~5:1) to afford the title compound as a yellow solid (58 mg, 54% yield).  $^1H$  NMR (400 MHz,  $CDCl_3$ ):  $\delta$  = 9.24 (d,  $J$  = 1.6 Hz, 1H), 8.80 (dd,  $J$  = 4.8, 2.0 Hz, 1H), 8.28 (dt,  $J$  = 8.0, 2.0 Hz, 1H), 7.83 (d,  $J$  = 15.6 Hz, 1H), 7.67-7.65 (m, 2H), 7.51-7.44 (m, 5H);  $^{13}C$  NMR (100 MHz,  $CDCl_3$ ):  $\delta$  = 189.3, 153.3, 149.9, 146.2, 136.1, 134.6,

133.7, 131.2, 129.2, 128.8, 123.8, 121.6. GC-MS (EI): calcd for C<sub>14</sub>H<sub>11</sub>NO [M] 209.08, found 209.10.

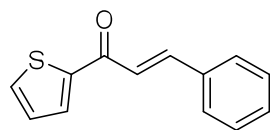

**(E)-3-phenyl-1-(thiophen-2-yl)prop-2-en-1-one (Table 2, 3k)<sup>10</sup>**

The general procedure was applied to 1-(thiophen-2-yl)ethanone (54 µL, 0.5 mmol), dibenzylamine (480 µL, 2.5 mmol) at 120 °C for 24 h under N<sub>2</sub>. The crude product was purified by column chromatography on silica gel (petroleum ether/CH<sub>2</sub>Cl<sub>2</sub> 5:2~1:1) to afford the title compound as a yellow solid (79 mg, 74% yield). <sup>1</sup>H NMR (400 MHz, CDCl<sub>3</sub>): δ = 7.88 (s, 1H), 7.84 (d, *J* = 11.6 Hz, 1H), 7.70-7.64 (m, 3H), 7.45-7.41 (m, 4H), 7.18 (t, *J* = 4.4 Hz, 1H); <sup>13</sup>C NMR (100 MHz, CDCl<sub>3</sub>): δ = 182.2, 145.7, 144.2, 134.9, 134.0, 131.9, 130.7, 129.1, 128.6, 128.4, 121.9. GC-MS (EI): calcd for C<sub>13</sub>H<sub>10</sub>OS [M] 214.05, found 214.10.

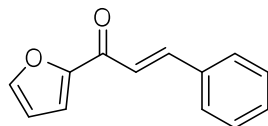

**(E)-1-(furan-2-yl)-3-phenylprop-2-en-1-one (Table 2, 3l)<sup>9</sup>**

The general procedure was applied to 1-(furan-2-yl)ethanone (50 µL, 0.5 mmol), dibenzylamine (480 µL, 2.5 mmol) at 120 °C for 24 h under N<sub>2</sub>. The crude product was purified by column chromatography on silica gel (petroleum ether/CH<sub>2</sub>Cl<sub>2</sub> 5:2~1:1) to afford the title compound as a yellow solid (53 mg, 54% yield). <sup>1</sup>H NMR (400 MHz, CDCl<sub>3</sub>): δ = 7.75 (d, *J* = 7.2 Hz, 2H), 7.54 (t, *J* = 7.4 Hz, 1H), 7.47-7.38 (m, 5H), 7.34 (m, 1H), 7.18 (s, 1H); <sup>13</sup>C NMR (100 MHz, CDCl<sub>3</sub>): δ = 199.5, 142.2, 138.5, 136.9, 135.8, 131.7, 129.7 (2C), 129.5 (2C), 128.6, 128.5 (2C). GC-MS (EI): calcd for C<sub>13</sub>H<sub>10</sub>O<sub>2</sub> [M] 198.07, found 198.12.

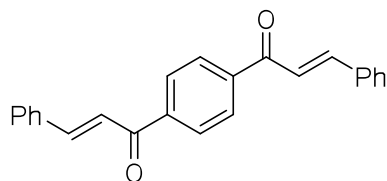

**(2*E*,2'*E*)-1,1'-(1,4-phenylene)bis(3-phenylprop-2-en-1-one) (Table 2, 3m)**<sup>10</sup>

The general procedure was applied to 1,1'-(1,4-phenylene)diethanone **1d** (81 mg, 0.5 mmol), dibenzylamine **2d** (960  $\mu$ L, 5.0 mmol), and (NH<sub>4</sub>)<sub>2</sub>S<sub>2</sub>O<sub>8</sub> (685 mg, 3.0 mmol) at 120 °C for 24 h under N<sub>2</sub>. The crude product was purified by column chromatography on silica gel to provide the desired product (using petroleum ether/CH<sub>2</sub>Cl<sub>2</sub> 10:1~5:1 as mobile phase) as a yellow solid (51 mg, 30% yield). <sup>1</sup>H NMR (400 MHz, CDCl<sub>3</sub>):  $\delta$  = 8.13 (s, 4H), 7.85 (d, *J* = 15.6 Hz, 2H), 7.68–7.66 (m, 4H), 7.54 (d, *J* = 15.6 Hz, 2H), 7.46–7.44 (m, 6H); <sup>13</sup>C NMR (100 MHz, CDCl<sub>3</sub>):  $\delta$  = 190.1, 145.9, 141.3, 134.6, 130.9, 129.1, 128.7, 128.6, 121.9. LC-MS (ESI<sup>+</sup>): calcd for C<sub>24</sub>H<sub>18</sub>O<sub>2</sub> [M+H]<sup>+</sup> 339.14, found 339.24.

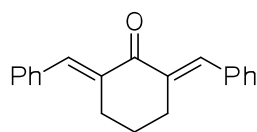

**(2*E*, 6*E*)-2,6-dibenzylidenecyclohexanone (Table 2, 3n)**<sup>11</sup>

The general procedure was applied to cyclohexanone (52  $\mu$ L, 0.5 mmol), dibenzylamine (480  $\mu$ L, 5.0 mmol) at 120 °C for 24 h under N<sub>2</sub>. The crude product was purified by column chromatography on silica gel (petroleum ether/CH<sub>2</sub>Cl<sub>2</sub> 5:1~5:2) to afford the title compound as a yellow solid (71 mg, 52% yield). <sup>1</sup>H NMR (400 MHz, CDCl<sub>3</sub>):  $\delta$  = 7.80 (s, 2H), 7.45 (d, *J* = 7.2 Hz, 4H), 7.38 (t, *J* = 7.6 Hz, 4H), 7.31 (t, *J* = 7.2 Hz, 2H), 2.90 (t, *J* = 5.2 Hz, 4H), 1.80-1.74 (m, 2H); <sup>13</sup>C NMR (100 MHz, CDCl<sub>3</sub>):  $\delta$  = 190.5, 137.0, 136.3, 136.1, 130.5, 128.7, 128.5, 28.6, 23.1. GC-MS (EI): calcd for C<sub>20</sub>H<sub>18</sub>O [M] 274.14, found 274.19.

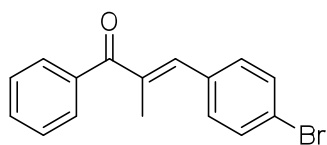

**(*E*)-3-(4-bromophenyl)-2-methyl-1-phenylprop-2-en-1-one (Table 3, 3o)**<sup>12</sup>

The general procedure was applied to propiophenone (33  $\mu$ L, 0.25 mmol), 1-(4-bromophenyl)-N-methylmethanamine (250  $\mu$ L, 1.25 mmol) at 120 °C for 24 h under N<sub>2</sub>. The crude product was purified by column chromatography on silica gel (petroleum ether/CH<sub>2</sub>Cl<sub>2</sub> 5:1~5:2) to afford the title compound as a light yellow solid

(67 mg, 89% yield).  $^1\text{H}$  NMR (400 MHz,  $\text{CDCl}_3$ ):  $\delta$  = 7.74 (d,  $J$  = 7.2 Hz, 2H), 7.55-7.53 (m, 3H), 7.46 (t,  $J$  = 8.0 Hz, 2H), 7.28 (d,  $J$  = 8.2 Hz, 2H), 7.09 (s, 1H), 2.24 (s, 3H);  $^{13}\text{C}$  NMR (100 MHz,  $\text{CDCl}_3$ ):  $\delta$  = 199.2, 140.6, 138.2, 137.5, 134.7, 131.8, 131.7, 131.2, 129.5, 128.3, 122.8, 14.5. GC-MS (EI): calcd for  $\text{C}_{16}\text{H}_{13}\text{BrO}$  [M] 300.01, found 300.07.

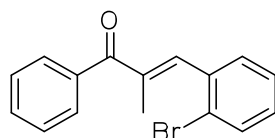

**(E)-3-(2-bromophenyl)-2-methyl-1-phenylprop-2-en-1-one (Table 3, 3p)**

The general procedure was applied to propiophenone (33  $\mu\text{L}$ , 0.25 mmol), 1-(2-bromophenyl)-N-methylmethanamine (184  $\mu\text{L}$ , 1.25 mmol) at 120  $^\circ\text{C}$  for 24 h under  $\text{N}_2$ . The crude product was purified by column chromatography on silica gel (petroleum ether/ $\text{CH}_2\text{Cl}_2$  5:1~5:2) to afford the title compound as a light yellow solid (39 mg, 52% yield).  $^1\text{H}$  NMR (400 MHz,  $\text{CDCl}_3$ ):  $\delta$  = 7.93 (d,  $J$  = 8.0 Hz, 2H), 7.69 (d,  $J$  = 8.0 Hz, 1H), 7.62 (t,  $J$  = 7.6 Hz, 1H), 7.54 (t,  $J$  = 8.0 Hz, 2H), 7.42 (m, 2H), 7.32 (s, 1H), 7.26 (m, 1H), 2.17 (s, 3H);  $^{13}\text{C}$  NMR (100 MHz,  $\text{CDCl}_3$ ):  $\delta$  = 199.1, 140.7, 138.1, 137.9, 136.3, 132.8, 130.4, 129.74 (2C), 129.67 (2C), 128.3 (2C), 127.1, 124.2, 14.2. HRMS ( $\text{ESI}^+$ ): calcd for  $\text{C}_{16}\text{H}_{13}\text{BrO}$  [ $\text{M}+\text{Na}$ ] $^+$  323.0047, found 323.0056.

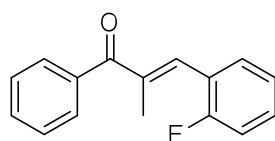

**(E)-3-(2-fluorophenyl)-2-methyl-1-phenylprop-2-en-1-one (Table 3, 3q)**

The general procedure was applied to propiophenone (33  $\mu\text{L}$ , 0.25 mmol), 1-(2-fluorophenyl)-N-methylmethanamine (166  $\mu\text{L}$ , 1.25 mmol) at 120  $^\circ\text{C}$  for 24 h under  $\text{N}_2$ . The crude product was purified by column chromatography on silica gel (petroleum ether/ $\text{CH}_2\text{Cl}_2$  5:1~5:2) to afford the title compound as a light yellow oil (30 mg, 50% yield).  $^1\text{H}$  NMR (400 MHz,  $\text{CDCl}_3$ ):  $\delta$  = 7.79 (d,  $J$  = 8.0 Hz, 2H), 7.56 (t,  $J$  = 7.4 Hz, 1H), 7.49-7.42 (m, 3H), 7.36-7.31 (m, 1H), 7.21-7.17 (m, 2H), 7.10 (t,  $J$  = 8.1 Hz, 1H), 2.18 (s, 3H);  $^{13}\text{C}$  NMR (100 MHz,  $\text{CDCl}_3$ ):  $\delta$  = 199.0, 161.5, 159.0, 138.9, 138.1, 134.3 ( $J$  = 12 Hz), 132.0, 130.4, 129.6 (3C), 128.3 (2C), 123.9 ( $J$  = 12

Hz), 115.7 ( $J = 22$  Hz), 14.6. HRMS (ESI<sup>+</sup>): calcd for C<sub>16</sub>H<sub>13</sub>FO [M+Na]<sup>+</sup> 268.0848, found 263.0844.

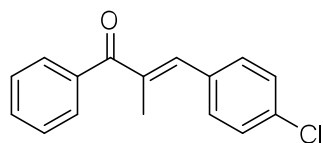

**(E)-3-(4-chlorophenyl)-2-methyl-1-phenylprop-2-en-1-one (Table 3, 3r)<sup>13</sup>**

The general procedure was applied to propiophenone (33  $\mu$ L, 0.25 mmol), 1-(4-chlorophenyl)-N-methylmethanamine (179  $\mu$ L, 1.25 mmol) at 120 °C for 24 h under N<sub>2</sub>. The crude product was purified by column chromatography on silica gel (petroleum ether/CH<sub>2</sub>Cl<sub>2</sub> 5:1~5:2) to afford the title compound as a light yellow oil (50 mg, 78% yield). <sup>1</sup>H NMR (400 MHz, CDCl<sub>3</sub>):  $\delta$  = 7.73 (d,  $J = 8.4$  Hz, 2H), 7.55 (t,  $J = 7.6$  Hz, 1H), 7.46 (t,  $J = 7.2$  Hz, 2H), 7.39-7.33 (m, 4H), 7.11 (s, 1H), 2.24 (d,  $J = 0.8$  Hz, 3H); <sup>13</sup>C NMR (100 MHz, CDCl<sub>3</sub>):  $\delta$  = 199.2, 140.6, 138.3, 137.4, 134.5, 134.2, 131.8, 130.9, 129.5, 128.7, 128.3, 14.5. GC-MS (EI): calcd for C<sub>16</sub>H<sub>13</sub>ClO [M] 256.07, found 256.12.

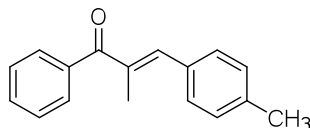

**(E)-2-methyl-1-phenyl-3-(p-tolyl)prop-2-en-1-one (Table 3, 3s)<sup>14</sup>**

The general procedure was applied to propiophenone (33  $\mu$ L, 0.25 mmol), N-methyl-1-(p-tolyl)methanamine (184  $\mu$ L, 1.25 mmol) at 120 °C for 24 h under N<sub>2</sub>. The crude product was purified by column chromatography on silica gel (petroleum ether/CH<sub>2</sub>Cl<sub>2</sub> 5:1~5:2) to afford the title compound as a colorless oil (45 mg, 75% yield). <sup>1</sup>H NMR (400 MHz, CDCl<sub>3</sub>):  $\delta$  = 7.73 (d,  $J = 6.8$  Hz, 2H), 7.54 (t,  $J = 7.2$  Hz, 1H), 7.45 (t,  $J = 7.4$  Hz, 2H), 7.33 (d,  $J = 16$  Hz, 2H), 7.21 (d,  $J = 16$  Hz, 2H), 7.17 (s, 1H), 2.38 (s, 3H), 2.27 (s, 3H); <sup>13</sup>C NMR (100 MHz, CDCl<sub>3</sub>):  $\delta$  = 199.6, 142.6, 138.9, 138.7, 136.0, 133.0, 131.5, 129.8, 129.5, 129.2, 128.2, 21.4, 14.4. GC-MS (EI): calcd for C<sub>17</sub>H<sub>16</sub>O [M] 236.12, found 236.17.

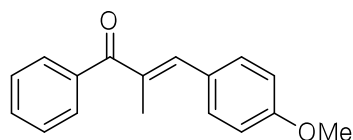

**(E)-3-(4-methoxyphenyl)-2-methyl-1-phenylprop-2-en-1-one (Table 3, 3t)**

The general procedure was applied to propiophenone (33  $\mu$ L, 0.25 mmol), 1-(4-methoxyphenyl)-N-methylmethanamine (195  $\mu$ L, 1.25 mmol) at 120  $^{\circ}$ C for 24 h under  $N_2$ . The crude product was purified by column chromatography on silica gel (petroleum ether/ $CH_2Cl_2$  5:1~5:2) to afford the title compound as a light yellow solid (43 mg, 67% yield).  $^1H$  NMR (400 MHz,  $CDCl_3$ ):  $\delta$  = 7.70 (dd,  $J$  = 8.0, 1.6 Hz, 2H), 7.52 (t,  $J$  = 5.6 Hz, 1H), 7.45 (d,  $J$  = 7.2 Hz, 2H), 7.41 (t,  $J$  = 7.4 Hz, 2H), 7.15 (s, 1H), 6.93 (d,  $J$  = 8.8 Hz, 2H), 3.85 (s, 3H), 2.28 (d,  $J$  = 1.2 Hz, 3H);  $^{13}C$  NMR (100 MHz,  $CDCl_3$ ):  $\delta$  = 199.6, 160.0, 142.7, 138.9, 134.9, 131.6, 131.4, 129.4, 128.4, 128.2, 114.0, 55.4, 14.4. HRMS ( $ESI^+$ ): calcd for  $C_{17}H_{16}O_2$   $[M+Na]^+$  275.1048, found 275.1052.

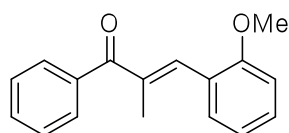

**(E)-3-(2-methoxyphenyl)-2-methyl-1-phenylprop-2-en-1-one (Table 3, 3u)**

The general procedure was applied to propiophenone (33  $\mu$ L, 0.25 mmol), 1-(2-methoxyphenyl)-N-methylmethanamine (188  $\mu$ L, 1.25 mmol) at 120  $^{\circ}$ C for 24 h under  $N_2$ . The crude product was purified by column chromatography on silica gel (petroleum ether/ $CH_2Cl_2$  5:1~5:2) to afford the title compound as light yellow oil (35 mg, 56% yield).  $^1H$  NMR (400 MHz,  $CDCl_3$ ):  $\delta$  = 7.79 (d,  $J$  = 8.0 Hz, 2H), 7.53 (t,  $J$  = 7.2 Hz, 1H), 7.47-7.40 (m, 3H), 7.38 (s, 1H), 7.33 (t,  $J$  = 7.2 Hz, 1H), 7.01 (t,  $J$  = 7.2 Hz, 1H), 6.90 (d,  $J$  = 8.0 Hz, 1H), 3.80 (s, 3H), 2.18 (d,  $J$  = 1.2 Hz, 3H);  $^{13}C$  NMR (100 MHz,  $CDCl_3$ ):  $\delta$  = 199.4, 157.4, 138.7, 138.5, 136.4, 131.6, 130.1, 130.0, 129.7, 128.1, 124.9, 120.2, 110.5, 55.5, 14.4. HRMS ( $ESI^+$ ): calcd for  $C_{17}H_{16}O_2$   $[M+Na]^+$  275.1048, found 275.1047.

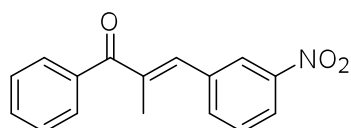

**(E)-2-methyl-3-(3-nitrophenyl)-1-phenylprop-2-en-1-one (Table 3, 3v)**

The general procedure was applied to propiophenone (33  $\mu$ L, 0.25 mmol), N-methyl-1-(3-nitrophenyl)methanamine (179  $\mu$ L, 1.25 mmol) at 120  $^{\circ}$ C for 24 h under  $N_2$ . The crude product was purified by column chromatography on silica gel (petroleum ether/ $CH_2Cl_2$  5:1~5:2) to afford the title compound as a white solid (46 mg, 68% yield).  $^1H$  NMR (400 MHz,  $CDCl_3$ ):  $\delta$  = 8.27 (t,  $J$  = 2.0 Hz, 1H), 7.78 (td,  $J$  = 8.0, 0.8 Hz, 1H), 7.77 (td,  $J$  = 8.4, 2.0 Hz, 2H), 7.72 (d,  $J$  = 8.0 Hz, 1H), 7.62-7.56 (m, 2H), 7.48 (t,  $J$  = 5.6 Hz, 2H), 7.16 (s, 1H), 2.28 (d,  $J$  = 1.6 Hz, 3H);  $^{13}C$  NMR (100 MHz,  $CDCl_3$ ):  $\delta$  = 198.7, 148.3, 139.5, 138.1, 137.7, 137.4, 135.2, 132.2, 129.5 (3C), 128.4 (2C), 124.1, 123.1, 14.6. HRMS ( $ESI^+$ ): calcd for  $C_{16}H_{13}NO_3$   $[M+Na]^+$  290.0793, found 290.0789.

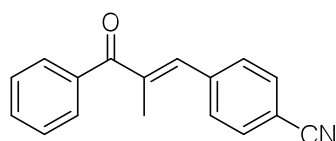

**(E)-3-(4-cyanophenyl)-2-methyl-1-phenylprop-2-en-1-one (Table 3, 3w)**

The general procedure was applied to propiophenone (33  $\mu$ L, 0.25 mmol), 4-((methylamino)methyl)benzonitrile (176  $\mu$ L, 1.25 mmol) at 120  $^{\circ}$ C for 24 h under  $N_2$ . The crude product was purified by column chromatography on silica gel (petroleum ether/ $CH_2Cl_2$  5:1~5:2) to afford the title compound as a white solid (56 mg, 89% yield).  $^1H$  NMR (400 MHz,  $CDCl_3$ ):  $\delta$  = 7.76 (d,  $J$  = 7.6 Hz, 2H), 7.70 (d,  $J$  = 8.0 Hz, 2H), 7.58 (t,  $J$  = 7.2 Hz, 1H), 7.51-7.46 (m, 4H), 7.11 (s, 1H), 2.25 (s, 3H);  $^{13}C$  NMR (100 MHz,  $CDCl_3$ ):  $\delta$  = 198.7, 140.3, 139.7, 138.7, 137.6, 132.25, 132.22, 130.0, 129.6, 128.4, 118.6, 111.8, 14.7. HRMS ( $ESI^+$ ): calcd for  $C_{17}H_{13}NO$   $[M+Na]^+$  270.0895, found 270.0933.

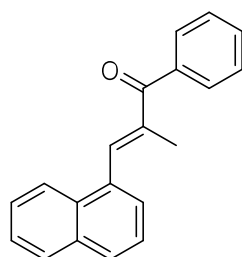

**(E)-2-methyl-3-(naphthalen-1-yl)-1-phenylprop-2-en-1-one (Table 3, 3x)**

The general procedure was applied to propiophenone (33  $\mu$ L, 0.25 mmol), *N*-methyl-1-(naphthalen-1-yl)methanamine (204  $\mu$ L, 1.25 mmol) at 120  $^{\circ}$ C for 24 h under  $N_2$ . The crude product was purified by column chromatography on silica gel (petroleum ether/ $CH_2Cl_2$  5:1~5:2) to afford the title compound as a white solid (33 mg, 48% yield).  $^1H$  NMR (400 MHz,  $CDCl_3$ ):  $\delta$  = 7.88 (m, 4H), 7.80 (d,  $J$  = 8.0 Hz, 1H), 7.69 (s, 1H), 7.58 (t,  $J$  = 6.4 Hz, 1H), 7.52 (m, 6H), 2.15 (s, 3H);  $^{13}C$  NMR (100 MHz,  $CDCl_3$ ):  $\delta$  = 199.3, 140.3, 139.0, 138.5, 133.6, 133.0, 131.9, 131.4, 129.5, 128.9, 128.7, 128.4, 126.8, 126.5, 126.2, 125.2, 124.5, 14.6. HRMS (ESI $^{+}$ ): calcd for  $C_{20}H_{16}O$   $[M+Na]^{+}$  295.1099, found 295.1093.

#### 4. Concise Synthesis of Bioactive Cytotoxic Dihydrochalcone **4**<sup>15</sup>

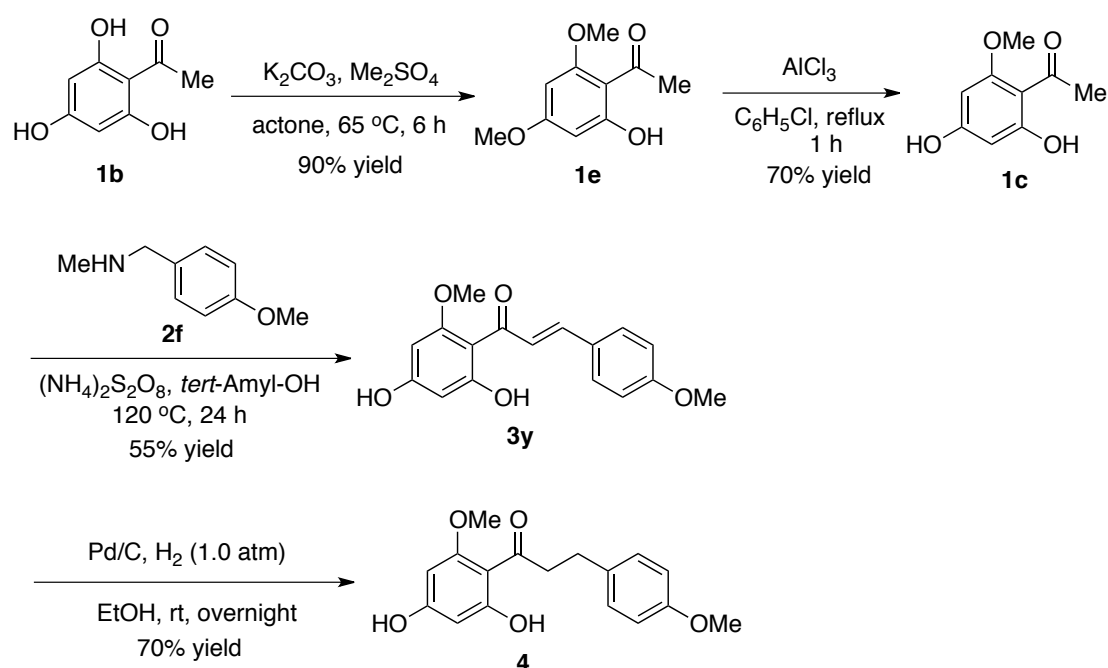

Compound **1e**, **1c** were prepared according to the literature.<sup>15</sup>

1-(2-Hydroxy-4,6-dimethoxyphenyl)ethanone **1e**: 947 mg, 90% yield.  $^1H$  NMR (400 MHz,  $CDCl_3$ ):  $\delta$  = 14.03 (s, 1H), 6.05 (d,  $J$  = 2.4 Hz, 1H), 5.91 (d,  $J$  = 2.4 Hz, 1H), 3.85 (s, 3H), 3.82 (s, 3H), 2.61 (s, 3H);  $^{13}C$  NMR (100 MHz,  $CDCl_3$ ):  $\delta$  = 203.2, 167.6, 166.1, 162.9, 106.0, 93.5, 90.8, 55.6 (2C), 32.9.

1-(2,4-Dihydroxy-6-methoxyphenyl)ethanone **1c**: 357 mg, 70% yield.  $^1H$  NMR (400 MHz,  $DMSO-d^6$ ):  $\delta$  = 13.82 (s, 1H), 5.97 (d,  $J$  = 2.0 Hz, 1H), 5.86 (d,  $J$  = 2.0 Hz, 1H),

3.82 (s, 3H), 2.52 (s, 3H);  $^{13}\text{C}$  NMR (100 MHz,  $\text{DMSO}-d_6$ ):  $\delta$  = 202.2, 166.3, 165.2, 163.4, 104.6, 95.6, 91.3, 55.8, 32.6.

**Synthesis of compound 3y:** The general procedure was applied to compound **1c** (91mg, 0.5 mmol), 1-(4-methoxyphenyl)-*N*-methylmethanamine **2f** (390  $\mu\text{L}$ , 2.5 mmol), and  $(\text{NH}_4)_2\text{S}_2\text{O}_8$  (342.3 mg, 1.5 mmol) at 120  $^\circ\text{C}$  for 24 h under  $\text{N}_2$ . The crude product was purified by column chromatography on silica gel to provide the desired product **3y** as a yellow solid (80 mg, 55% yield) (using petroleum ether/ ethyl acetate 5:1~5:2 as mobile phase).  $^1\text{H}$  NMR (400 MHz,  $\text{CDCl}_3$ ):  $\delta$  = 14.04 (s, 1H), 9.89 (s, 1H), 7.97 (d,  $J$  = 15.6 Hz, 1H), 7.84 (d,  $J$  = 15.6 Hz, 1H), 7.61 (d,  $J$  = 6.8 Hz, 2H), 7.01 (d,  $J$  = 8.4 Hz, 2H), 6.05 (d,  $J$  = 2.4 Hz, 1H), 5.91 (d,  $J$  = 2.4 Hz, 1H), 3.85 (s, 3H), 3.81 (s, 3H).  $^{13}\text{C}$  NMR (100 MHz,  $\text{CDCl}_3$ ):  $\delta$  = 189.8, 166.6, 165.1, 163.6, 161.9, 131.0 (2C), 128.9, 113.3 (2C), 105.0, 92.4 (2C), 89.7 (2C), 54.6, 54.5.

**Synthesis of cytotoxic dihydrochalcone 4:** In a dried Schlenk tube, compound (45 mg, 0.15 mmol), Pd/C (5 wt%, 20 mg) and ethanol (2.0 mL) were added under a hydrogen atmosphere (1.0 atm). The mixture was stirred at room temperature for overnight. After evaporation of the solvent under vacuum, the resulting residue was purified by chromatography (PE/EtOAc = 5:2) to provide the desired product **4** as a white solid (32 mg, 70% yield).  $^1\text{H}$  NMR (400 MHz,  $\text{CDCl}_3$ ):  $\delta$  = 13.96 (s, 1H), 7.15 (d,  $J$  = 8.8 Hz, 2H), 6.84 (d,  $J$  = 8.4 Hz, 2H), 5.99 (d,  $J$  = 2.4 Hz, 1H), 5.90 (d,  $J$  = 2.4 Hz, 1H), 3.84 (s, 3H), 3.80 (s, 3H), 3.26 (t,  $J$  = 7.6 Hz, 2H), 2.93 (t,  $J$  = 7.2 Hz, 2H).  $^{13}\text{C}$  NMR (100 MHz,  $\text{CDCl}_3$ ):  $\delta$  = 203.2, 167.6, 166.1, 162.9, 159.2, 133.1, 128.7, 114.0, 106.0, 93.5, 90.8, 55.6, 55.3, 45.1, 32.9.

## 5. Synthesis of Flavonoid Derivative **5**<sup>16</sup> via a One-Pot Operation

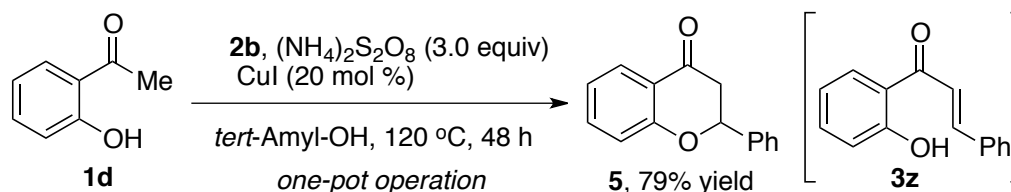

In a dried Schlenk tube, 1-(2-hydroxyphenyl)ethanone **1d** (136 mg, 1.0 mmol), *N*-methyl-1-phenylmethanamine **2b** (682  $\mu\text{L}$ , 5.0 mmol), CuI (38.2 mg, 0.2 mmol),

(NH<sub>4</sub>)<sub>2</sub>S<sub>2</sub>O<sub>8</sub> (684 mg, 3.0 mmol) and *tert*-Amyl alcohol (2.0 mL) were added under a nitrogen atmosphere. The reaction mixture was stirred at 120 °C for 48 h. Then the crude product was purified by column chromatography (PE/EtOAc = 5:2) (177 mg, 79% yield). <sup>1</sup>H NMR (400 MHz, CDCl<sub>3</sub>): δ = 7.94 (d, *J* = 8.0 Hz, 1H), 7.54-7.48 (m, 3H), 7.46-7.39 (m, 3H), 7.08-7.05 (m, 2H), 5.49 (dd, *J* = 10.8, 2.8 Hz, 1H), 3.10 (dd, *J* = 13.2, 3.6 Hz, 1H), 2.90 (dd, *J* = 14.0, 2.8 Hz, 1H); <sup>13</sup>C NMR (100 MHz, CDCl<sub>3</sub>): δ = 192.0, 161.6, 138.7, 136.2, 128.9, 128.8, 127.1, 126.2, 121.7, 120.9, 118.2, 79.6, 44.7. GC-MS (EI): calcd for C<sub>15</sub>H<sub>12</sub>O<sub>2</sub> [M] 224.08, found 224.15.

## 6. Synthesis of Compounds 6 and 7 for Mechanistic Studies

### Synthesis of β-Amino Ketone 6 and the Related Ammonium Salt 7

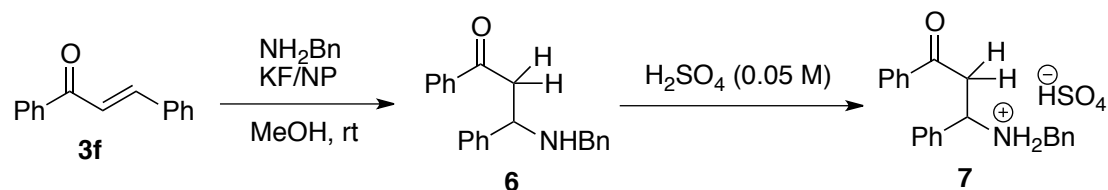

In a dried Schlenk, chalcone **3f** (936 mg, 4.5 mmol), benzylamine (492 μL, 4.5 mmol), KF/NP phosphate catalyst<sup>17,18</sup> and methanol (4.5 mL) was added under a nitrogen atmosphere. Then the mixture was stirred at room temperature for 24 h. The desired β-amino ketone **6** was obtained as a white solid through recrystallization from a PE/EtOAc solution (850 mg, 60% yield). <sup>1</sup>H NMR (400 MHz, CDCl<sub>3</sub>): δ = 7.89 (d, *J* = 7.6 Hz, 2H), 7.53 (t, *J* = 7.4 Hz, 1H), 7.43-7.39 (m, 4H), 7.36 (t, *J* = 7.4 Hz, 2H), 7.30-7.25 (m, 5H), 7.23-7.21 (m, 1H), 4.34 (dd, *J* = 4.4, 4.0 Hz, 1H), 3.62 (q, *J* = 13.6, 13.2 Hz, 2H), 3.38-3.28 (m, 2H), 2.26 (brs, 1H); <sup>13</sup>C NMR (100 MHz, CDCl<sub>3</sub>): δ = 198.9, 143.3, 140.4, 136.9, 133.2, 128.7, 128.6, 128.3, 128.2, 128.1, 127.41, 127.37, 126.8, 58.6, 51.6, 47.4. LC-MS (ESI<sup>+</sup>): calcd for C<sub>22</sub>H<sub>21</sub>NO [M+H]<sup>+</sup> 316.17, found 316.27.

A Schlenk tube was loaded with β-amino ketone **6** (470 mg, 1.5 mmol) and EtOAc (5 mL). When 0.05 M H<sub>2</sub>SO<sub>4</sub> (4 mL) was dropped into the solution, a colorless solid was produced at the boundary phase. After filtration and dry under vacuum, the desired ammonium salt **7** was obtained as a colorless solid (607 mg, 98%)<sup>19</sup>. <sup>1</sup>H NMR (400

MHz, CDCl<sub>3</sub>):  $\delta$  = 7.82 (d,  $J$  = 7.6 Hz, 2H), 7.72 (t,  $J$  = 7.2 Hz, 2H), 7.45-7.27 (m, 11H), 4.64 (s, 1H), 7.24 (d,  $J$  = 16.4 Hz, 1H), 4.07-4.03 (m, 1H), 3.95 (d,  $J$  = 13.6 Hz, 1H), 3.61 (d,  $J$  = 13.6 Hz, 1H), 1.61 (brs, 2H); <sup>13</sup>C NMR (100 MHz, CDCl<sub>3</sub>):  $\delta$  = 199.0, 143.2, 140.4, 136.9, 133.2, 128.7, 128.6, 128.3, 128.2, 128.1, 127.43, 127.38, 126.8, 57.7, 48.4, 42.8. LC-MS (ESI<sup>+</sup>): calcd for C<sub>22</sub>H<sub>21</sub>NO [M-HSO<sub>4</sub>]<sup>+</sup> 316.17, found 316.21.

## REFERENCES

- (1) Still, W. C.; Kahn, M.; Mitra, A. *J. Org. Chem.* **1978**, *43*, 2923.
- (2) Onishi, Y.; Yoneda, Y.; Nishimoto, Y.; Yasuda, M.; Baba, A. *Org. Lett.* **2012**, *14*, 5788.
- (3) Artok, L.; Kus, M.; Aksin-Artok, O.; Dege, F. N.; Ozkılınç, F. Y. *Tetrahedron* **2009**, *65*, 9125.
- (4) Rudrapal, M.; Satyanandam, R. S.; Swaroopini, T. S.; Lakshmi, T. N. *Med. Chem. Res.* **2013**, *22*, 2840.
- (5) Abaee, M. S.; Cheraghi, S.; Navidipoor, S.; Mojtahedi, M. M.; Forghani, S. *Tetrahedron Lett.* **2012**, *53*, 4405.
- (6) Wu, X. F.; Neumann, H.; Spannenberg, A.; Schulz, T.; Jiao, H.; Beller, M. *J. Am. Chem. Soc.* **2010**, *132*, 14596.
- (7) Weber, W. M.; Hunsaker, L. A.; Abcouwer, S. F.; Deck, L. M.; Vander Jagt, D. L. *Bioorg. Med. Chem.* **2005**, *13*, 3811.
- (8) Kuş, M.; Artok, Ö. A.; Ziyank, F.; Artok, L. *Synlett* **2008**, *17*, 2587.
- (9) Ogawa, D.; Hyodo, K.; Suetsugu, M.; Li, J.; Inoue, Y.; Fujisawa, M.; Iwasaki, M.; Takagi, K.; Nishihara, Y. *Tetrahedron* **2013**, *69*, 2565.
- (10) Mobinikhaledi, A.; Kalhor, M.; Jamalifar, H. *Med. Chem. Res.* **2012**, *21*, 1811.
- (11) Riadi, Y.; Mamouni, R.; Azzalou, R.; Boulahjar, R.; Abrouki, Y.; Haddad, M. E.; Routier, S.; Guillaumet, G.; Lazar, S. *Tetrahedron Lett.* **2010**, *51*, 6715.
- (12) Xu, T.; Yang, Q.; Li, D. P.; Dong, J. H.; Yu, Z. K.; Li, Y. X. *Chem.-Eur. J.* **2010**, *16*, 9264.
- (13) Nishide, K.; Ozeki, M.; Kunishige, H.; Shigeta, Y.; Patra, P. K.; Hagimoto, Y.; Node, M. *Angew. Chem., Int. Ed.* **2003**, *42*, 4515.
- (14) Barluenga, J.; Joglar, J.; Gonzitlez, F. J.; Gotor, V.; Fustero, S. *J. Org. Chem.* **1988**, *53*, 5960.
- (15) Aponte, J. C.; Verastegui, M.; Malaga, E.; Zimic, M.; Quiliano, M.; Vaisberg, A. J.; Gilman, R. H.; Hammond G. B. *J. Med. Chem.* **2008**, *51*, 6230.
- (16) Du, Z. Y.; Ng, H. F.; Zhang, K.; Zeng, H. Q.; Wang, J. *Org. Biomol. Chem.* **2011**, *9*, 6930.
- (17) Zahouily, M.; Bahlaouan, B.; Rayadh, A.; Sebt, S. *Tetrahedron Letters* **2004**, *45*, 4135.
- (18) Zahouily, M.; Bahlaouan, W.; Bahlaouan, B.; Rayadh, A.; Sebt, S. *Arkivoc* **2005**, XIII, 150.
- (19) Wilson, S. D.; Sun, L. H. *Journal of the Chinese Chemical Society (Peking)* **1934**, *V2*, 243.

## 7. Copies of $^1\text{H}$ and $^{13}\text{C}$ NMR spectra

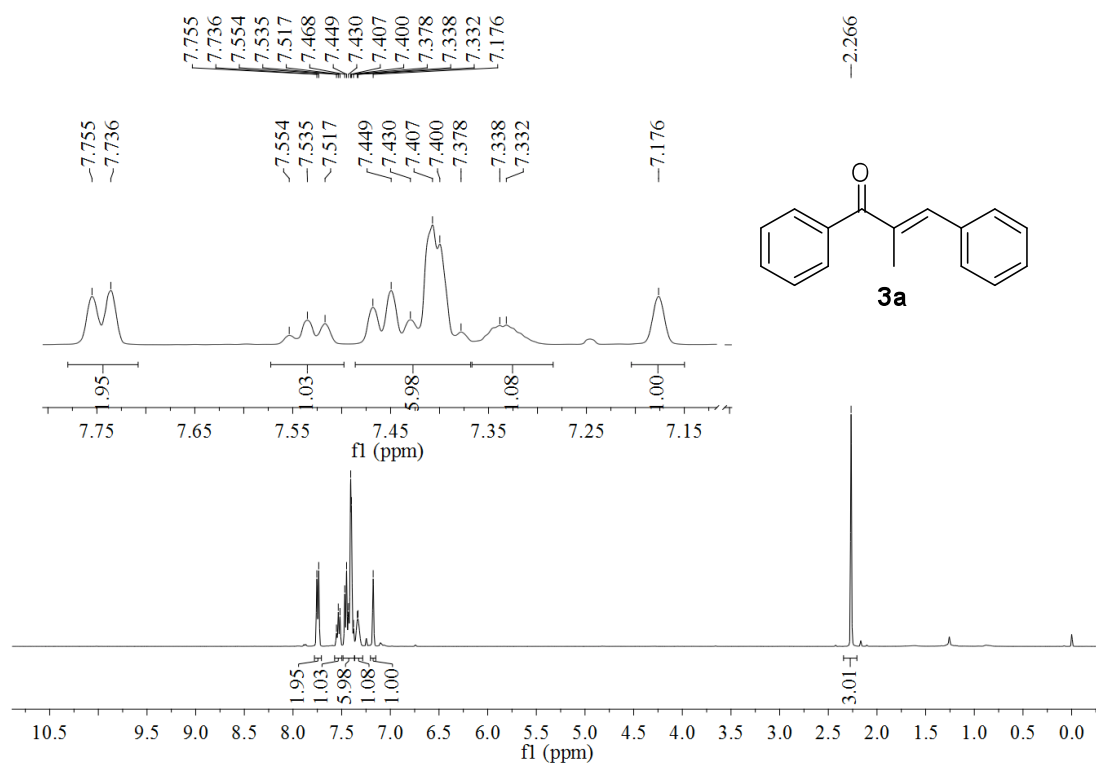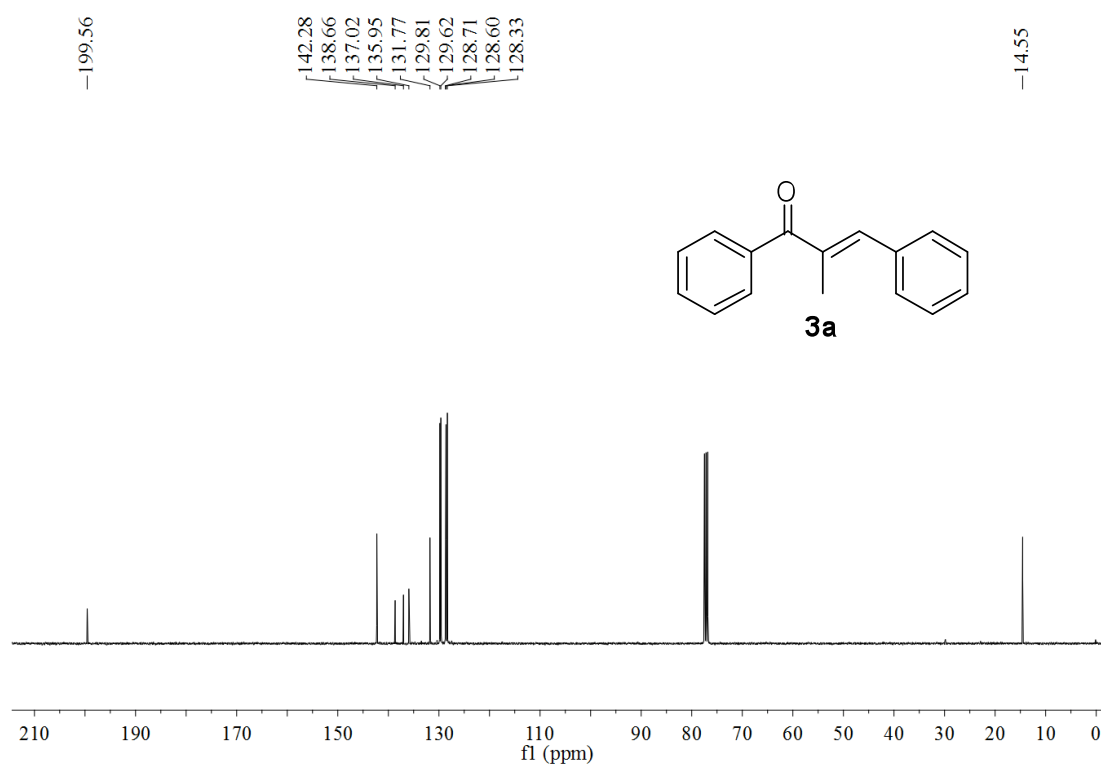

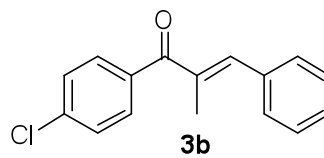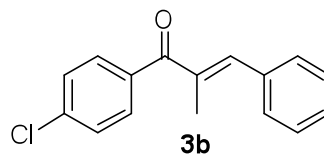

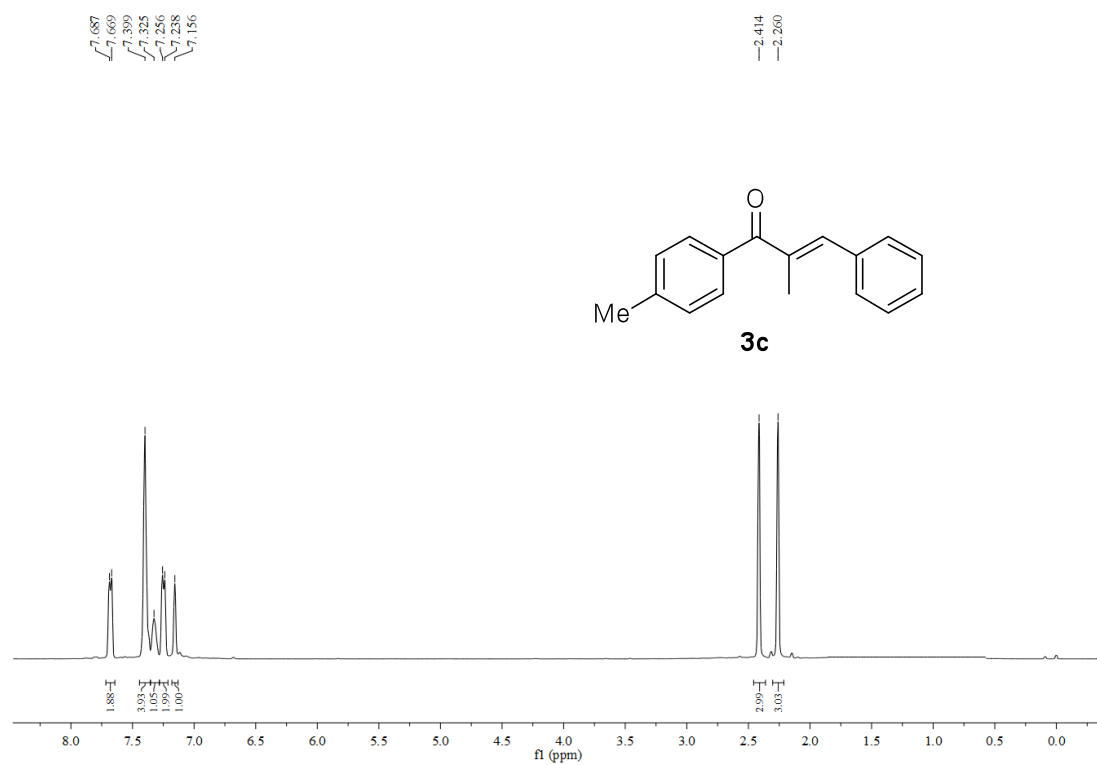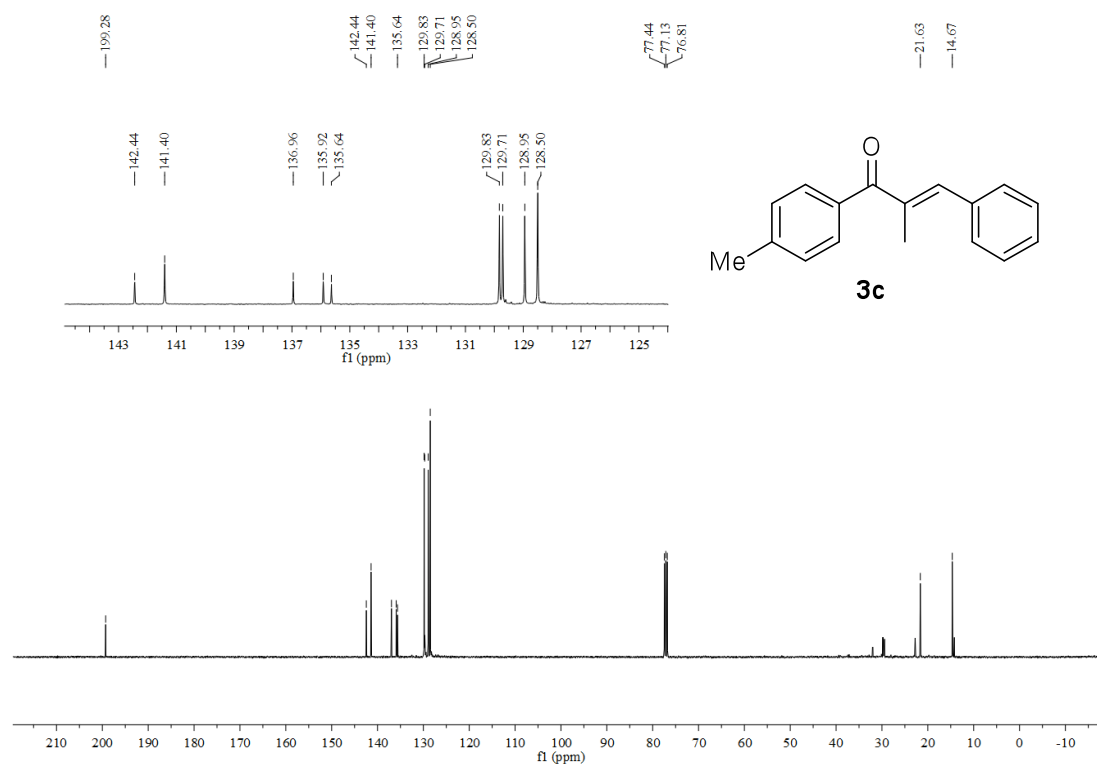

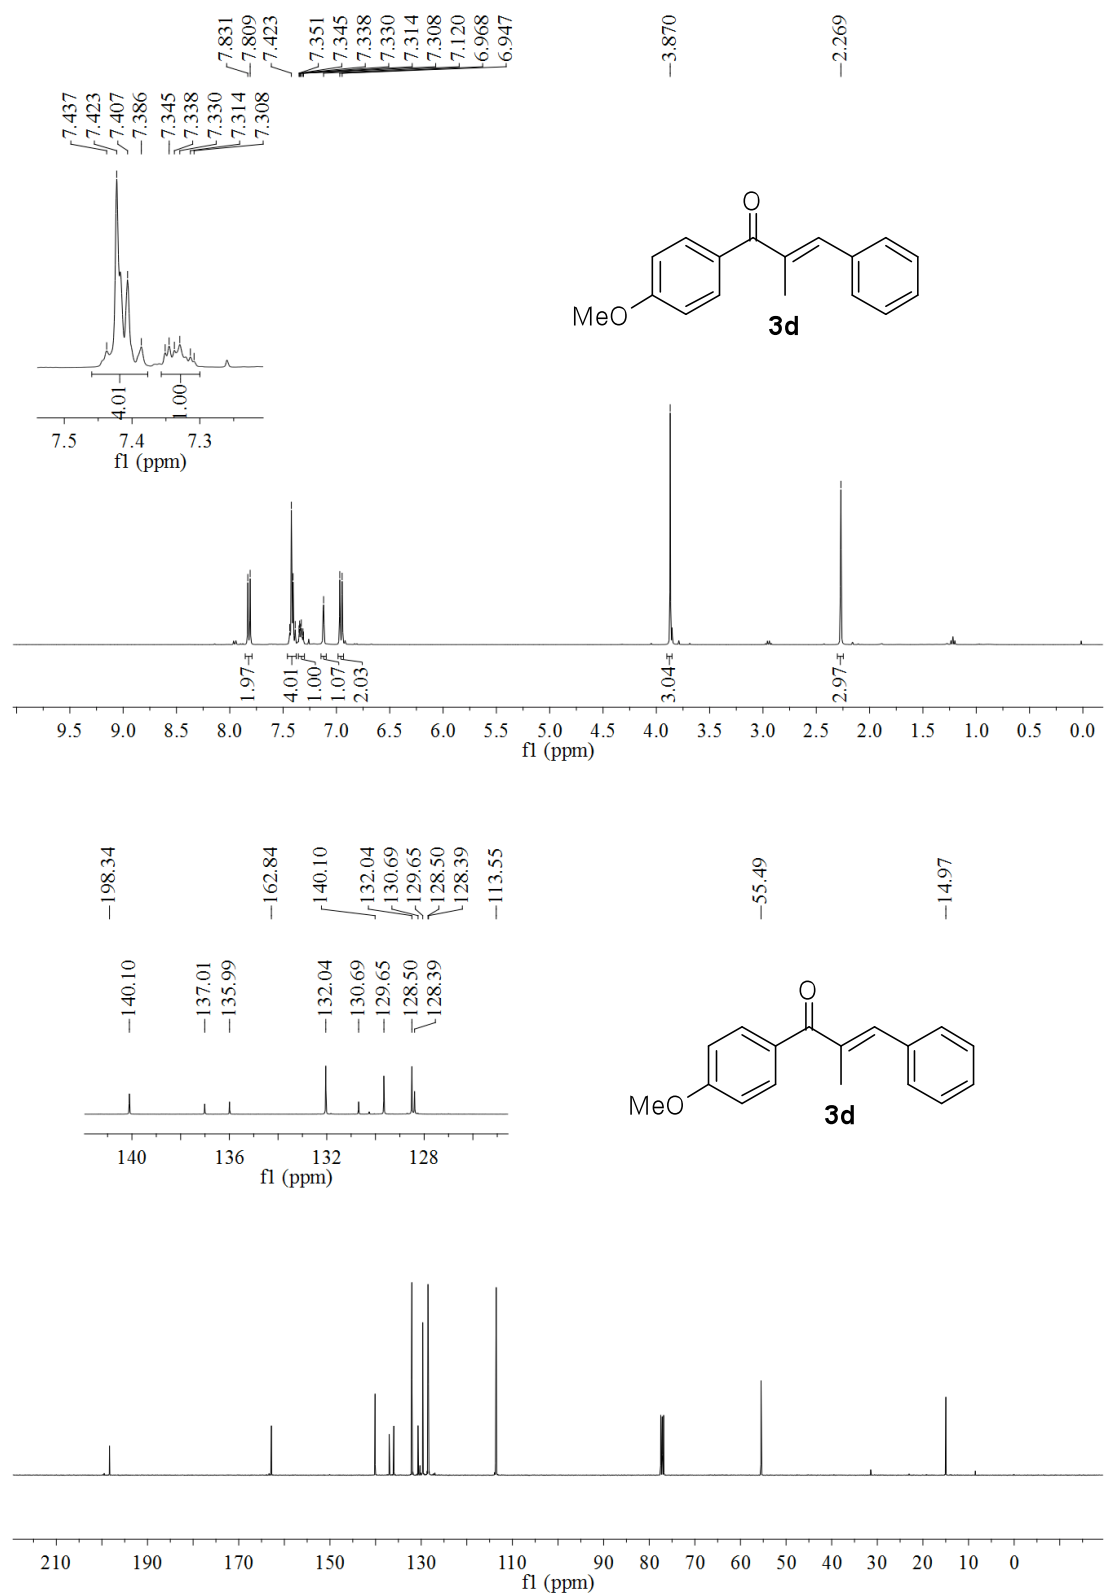

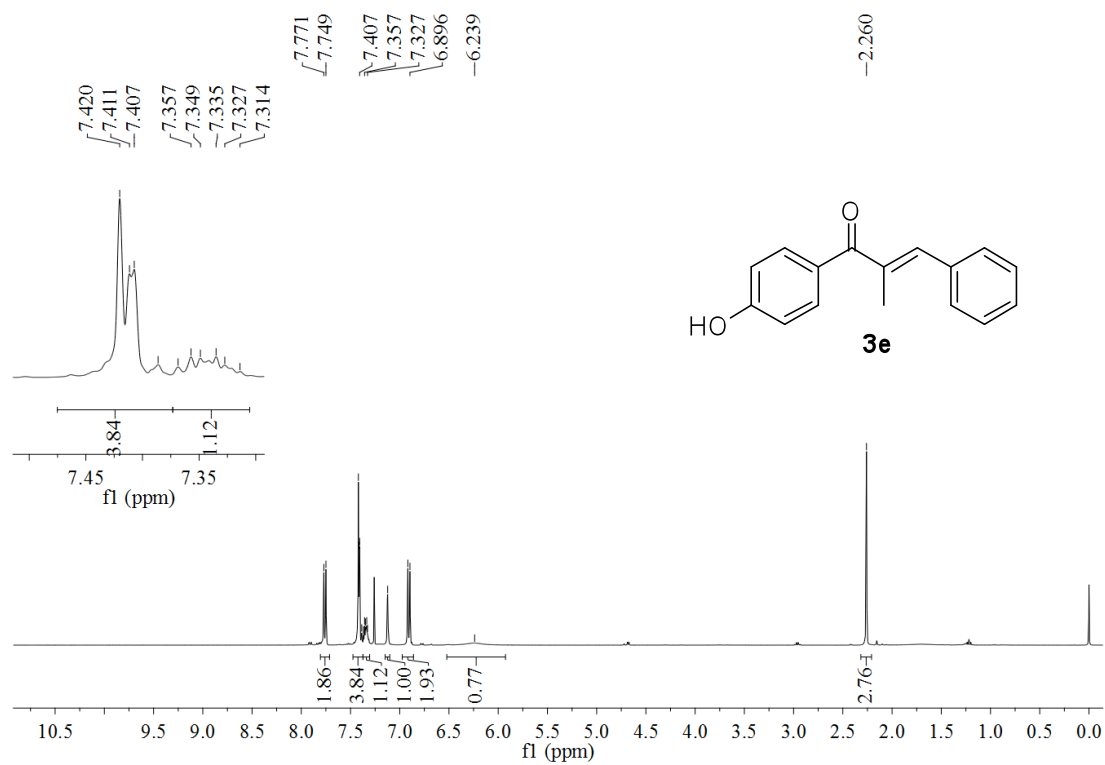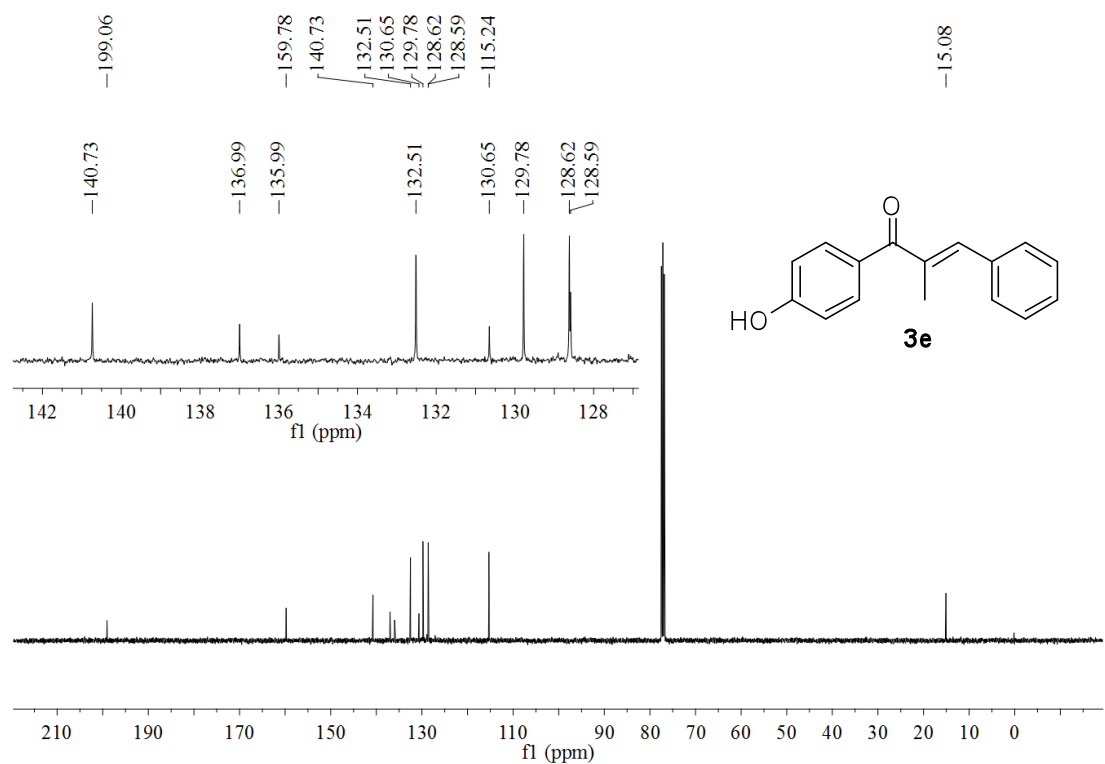

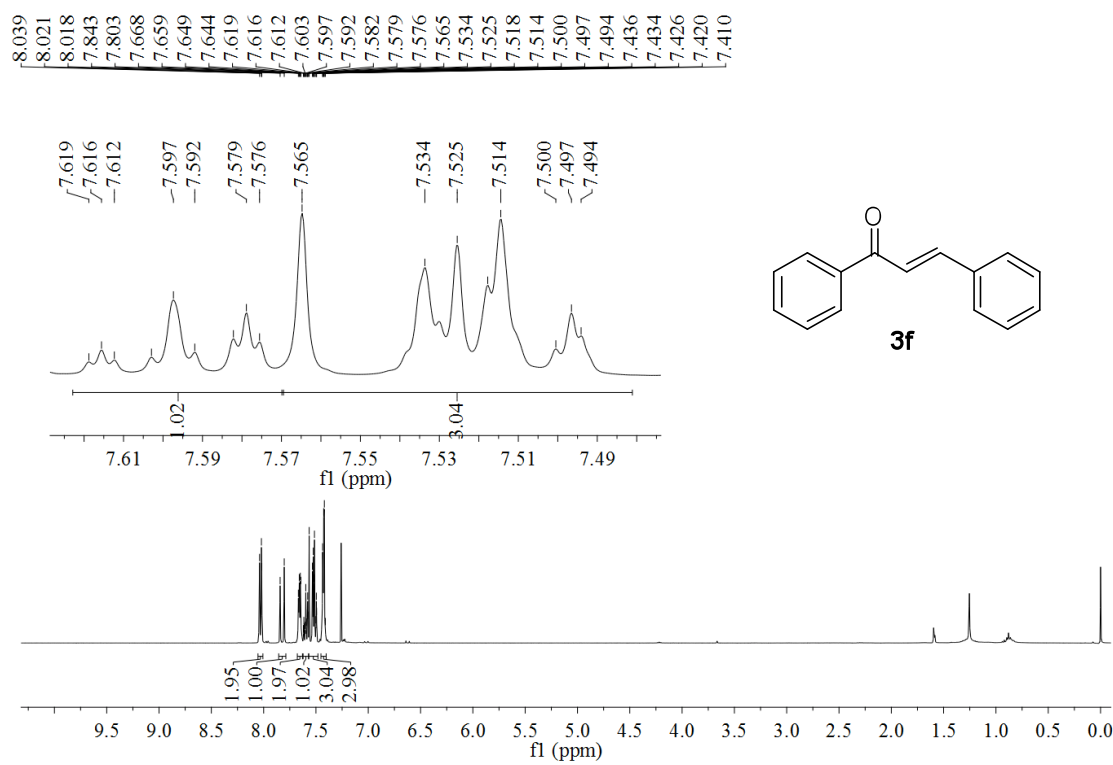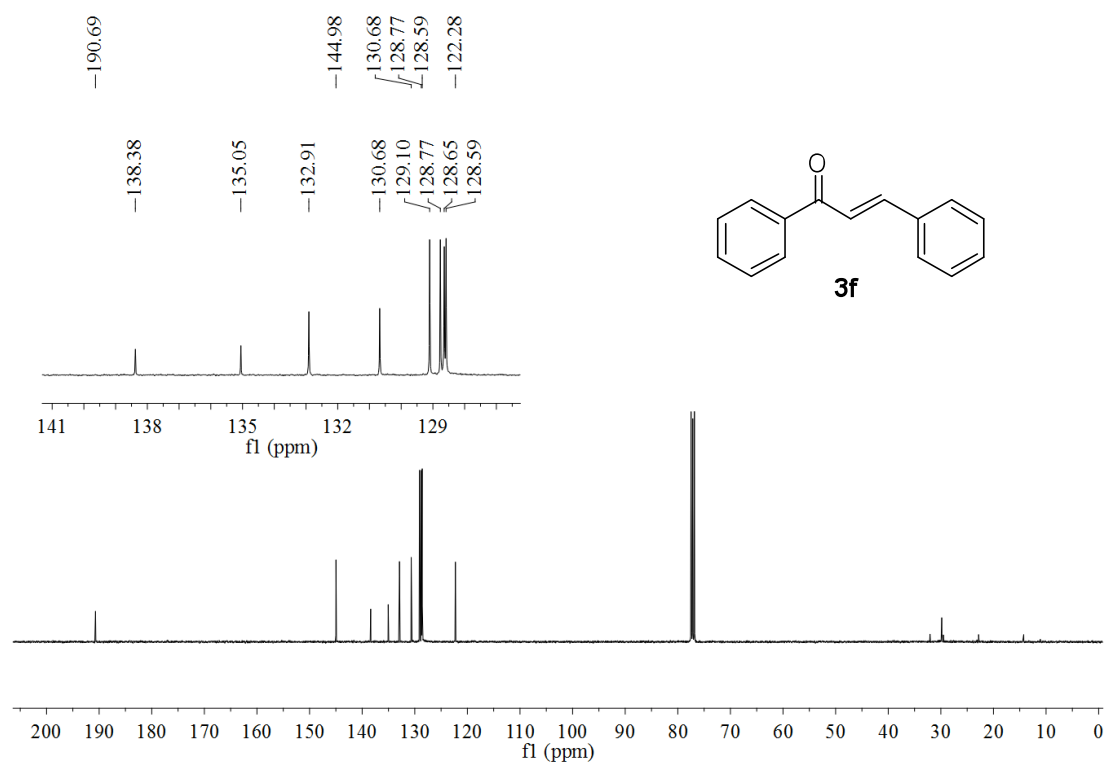

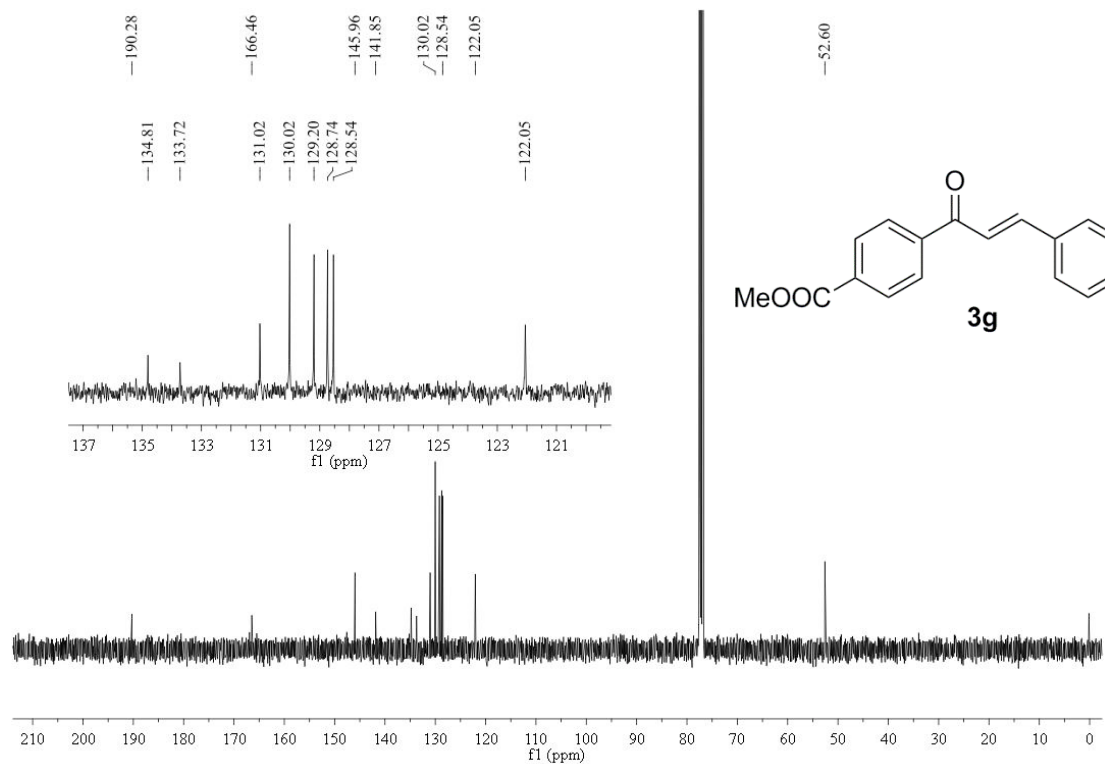

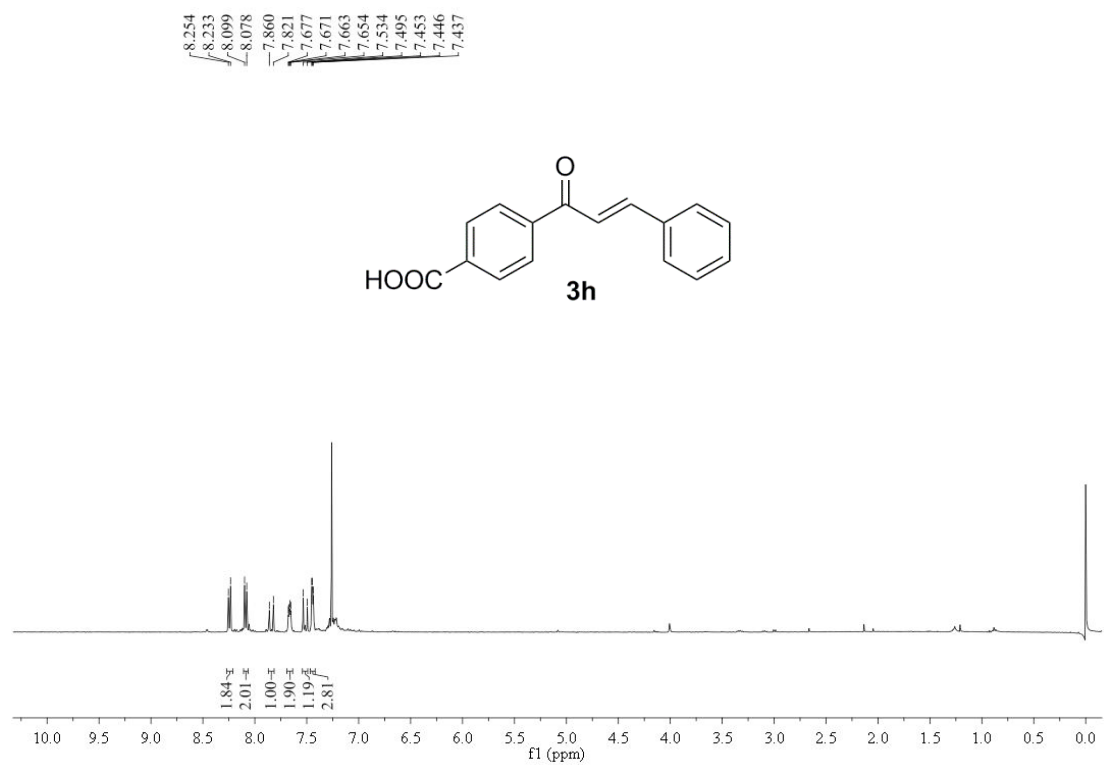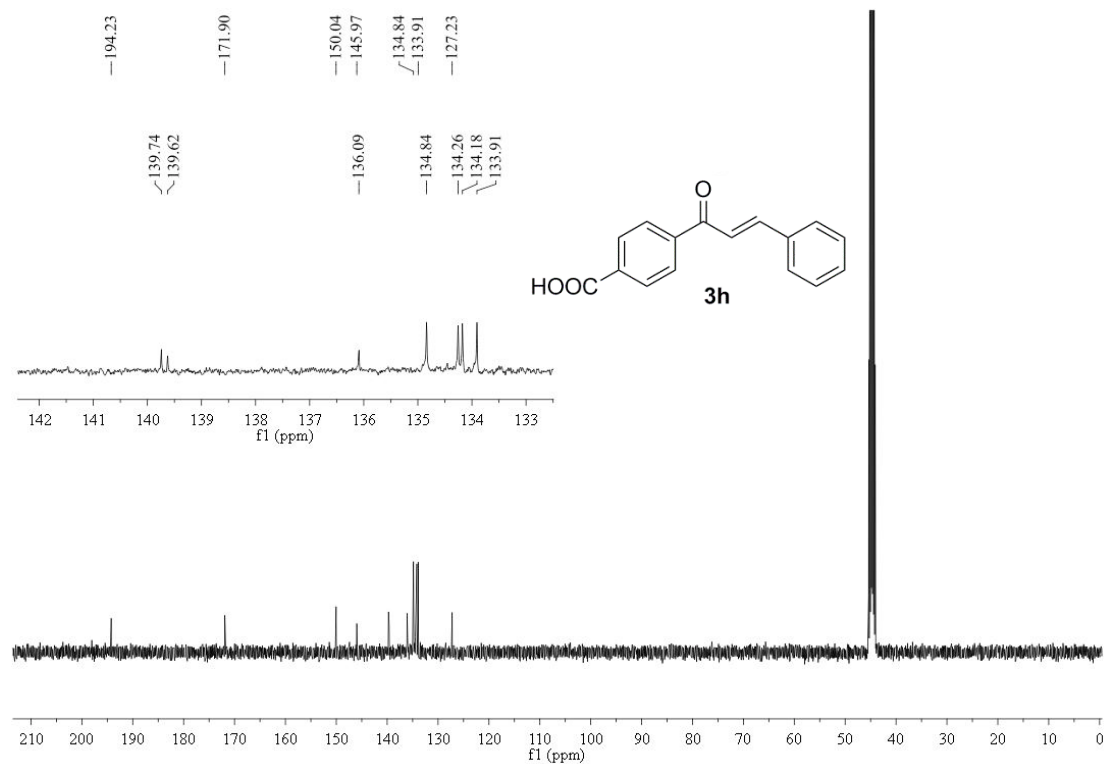

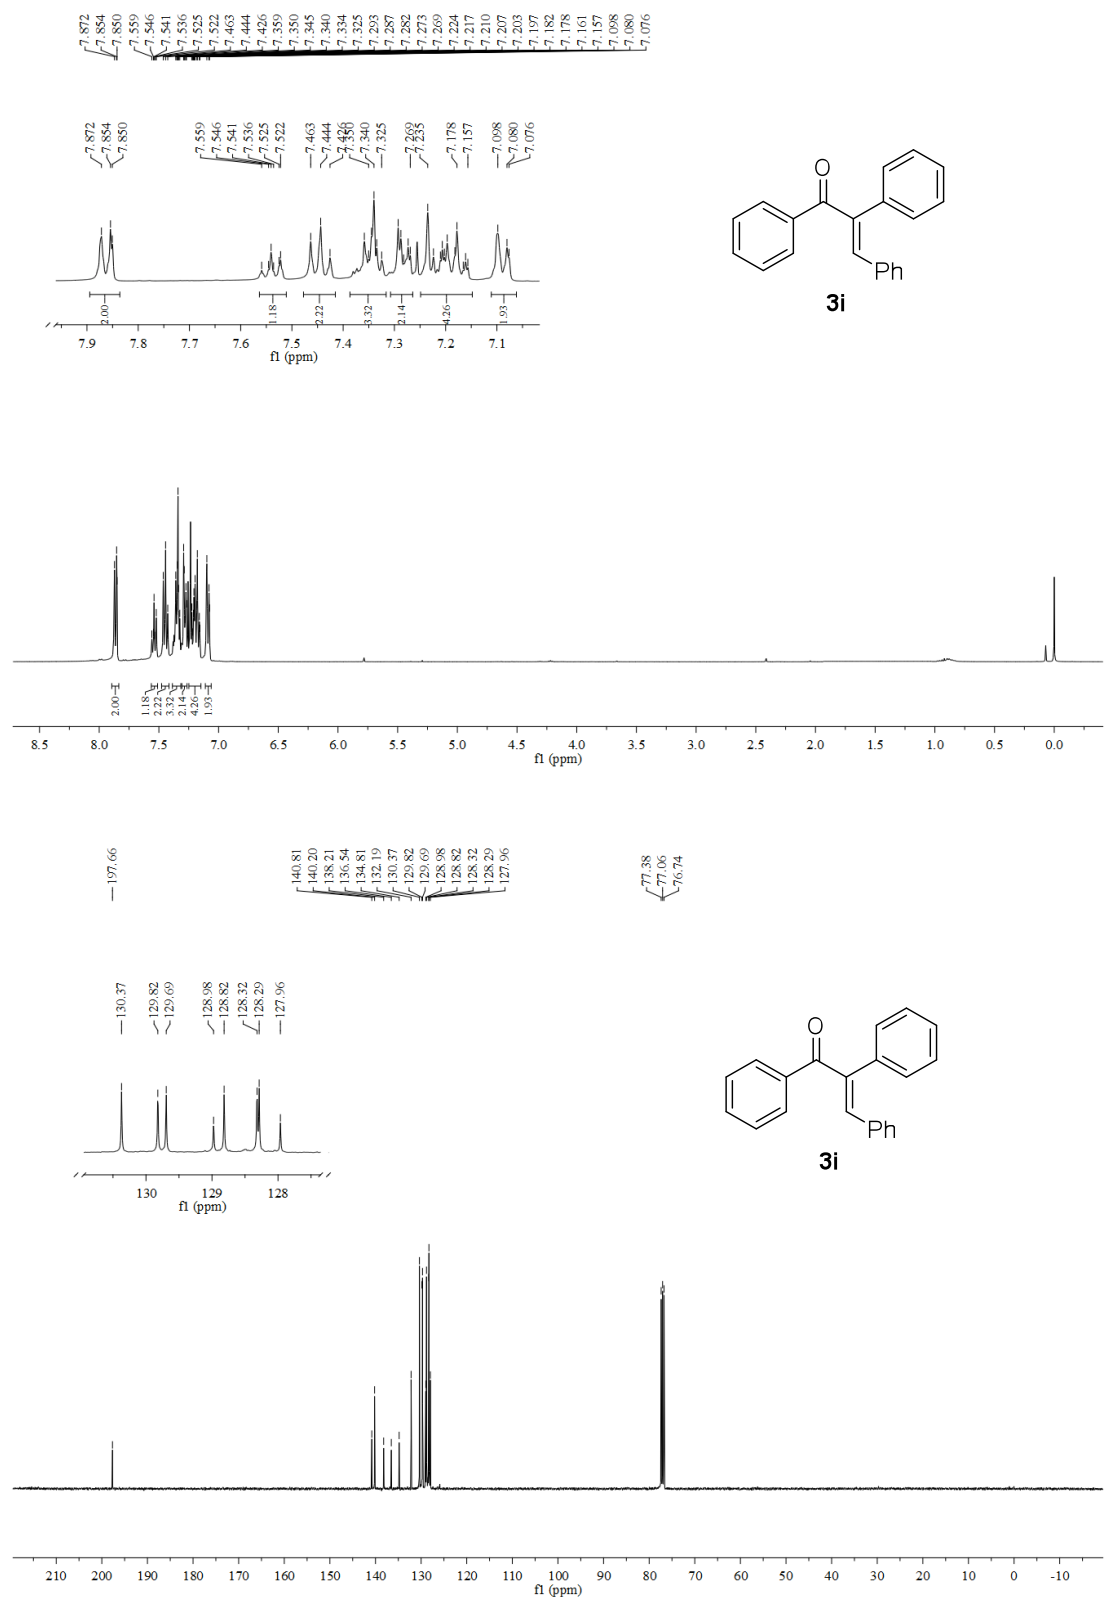

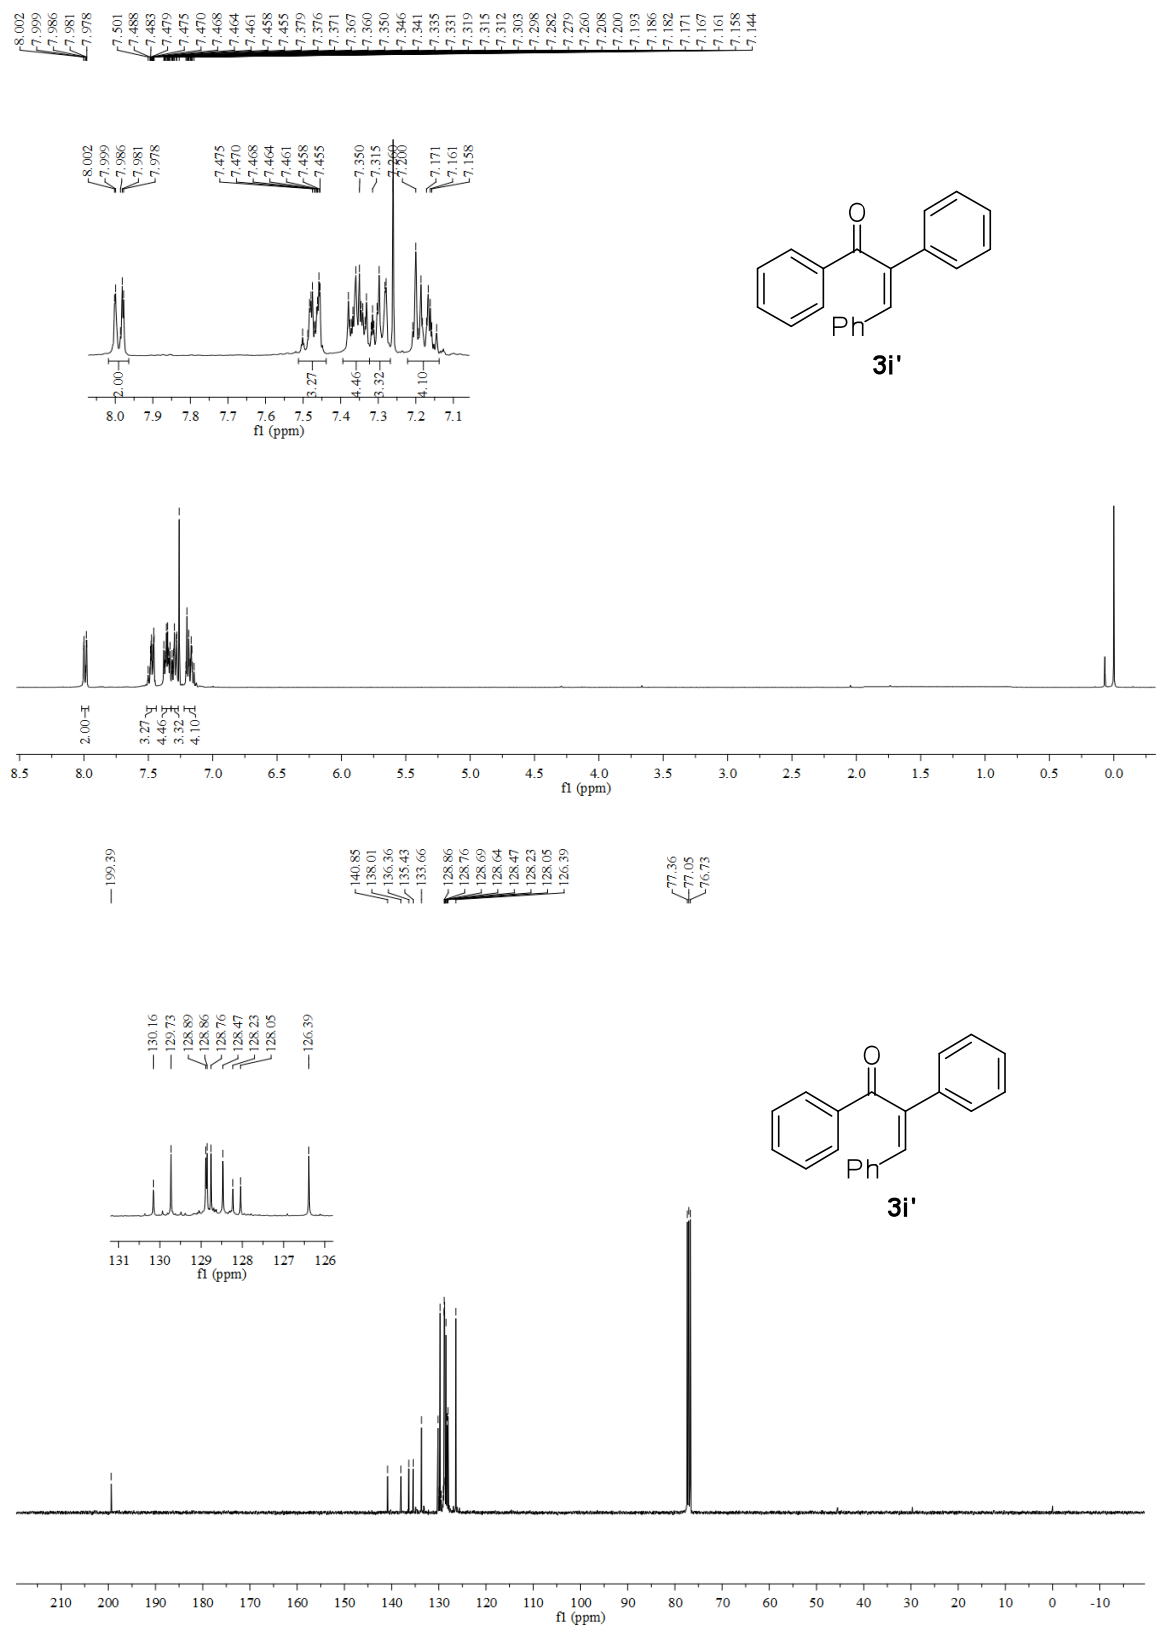

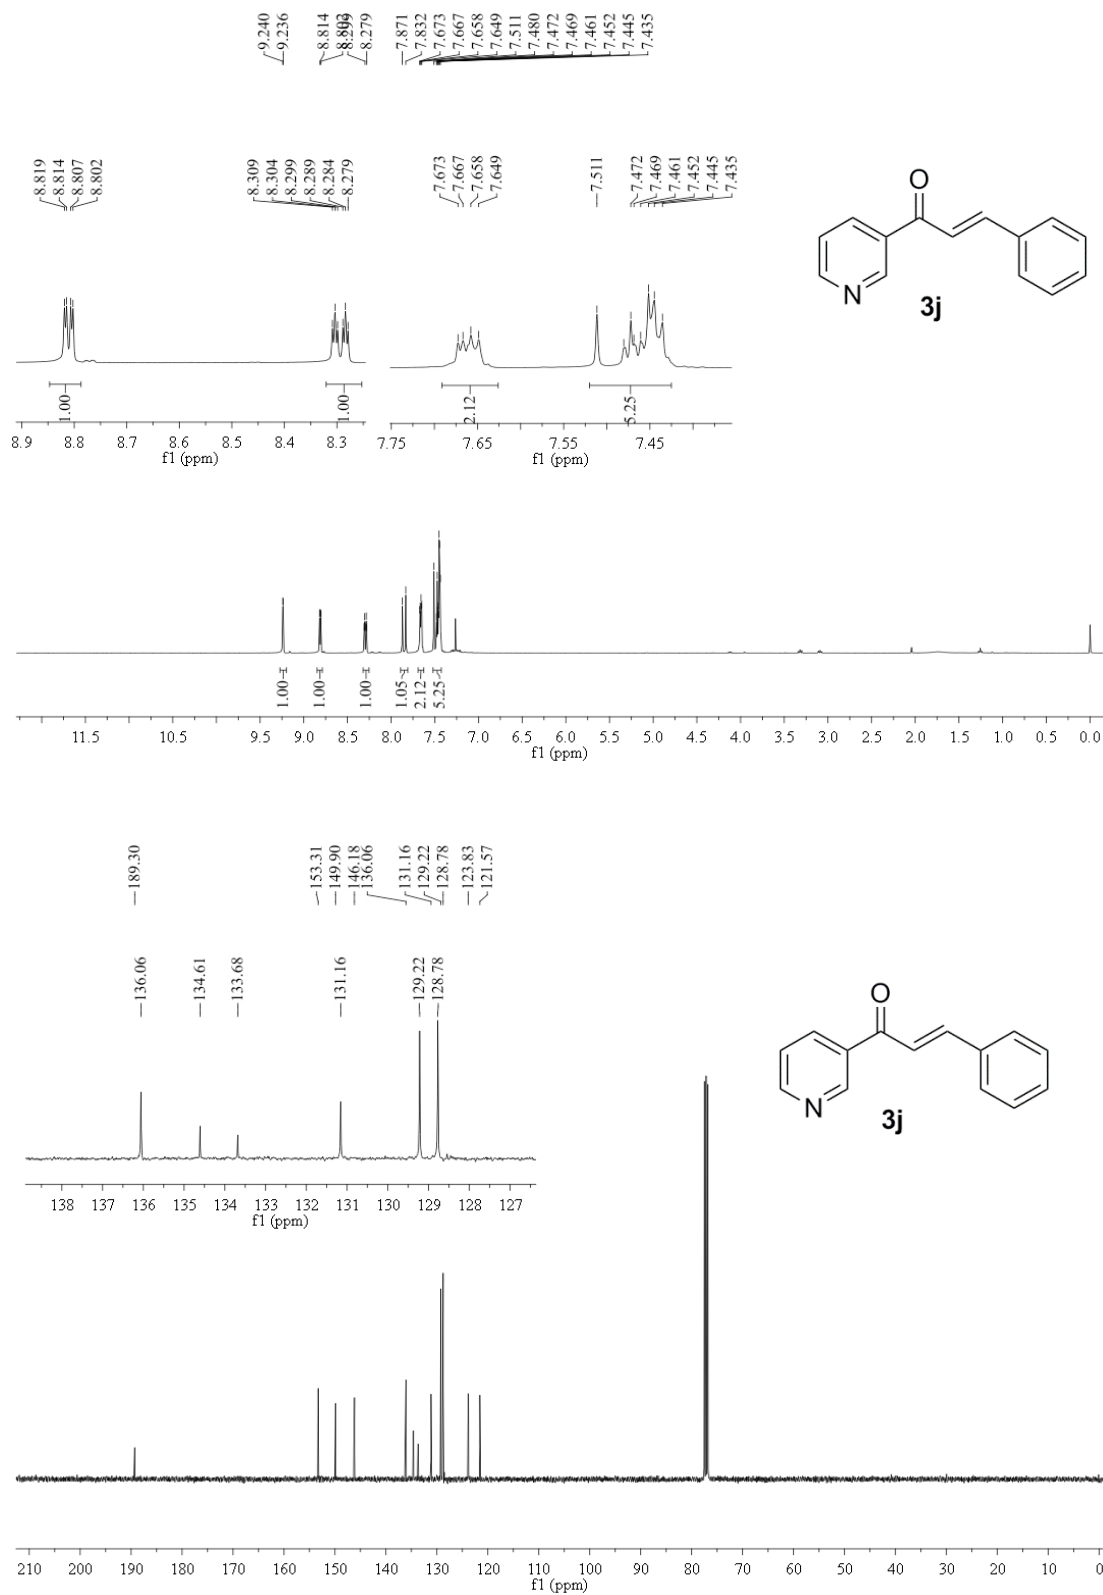

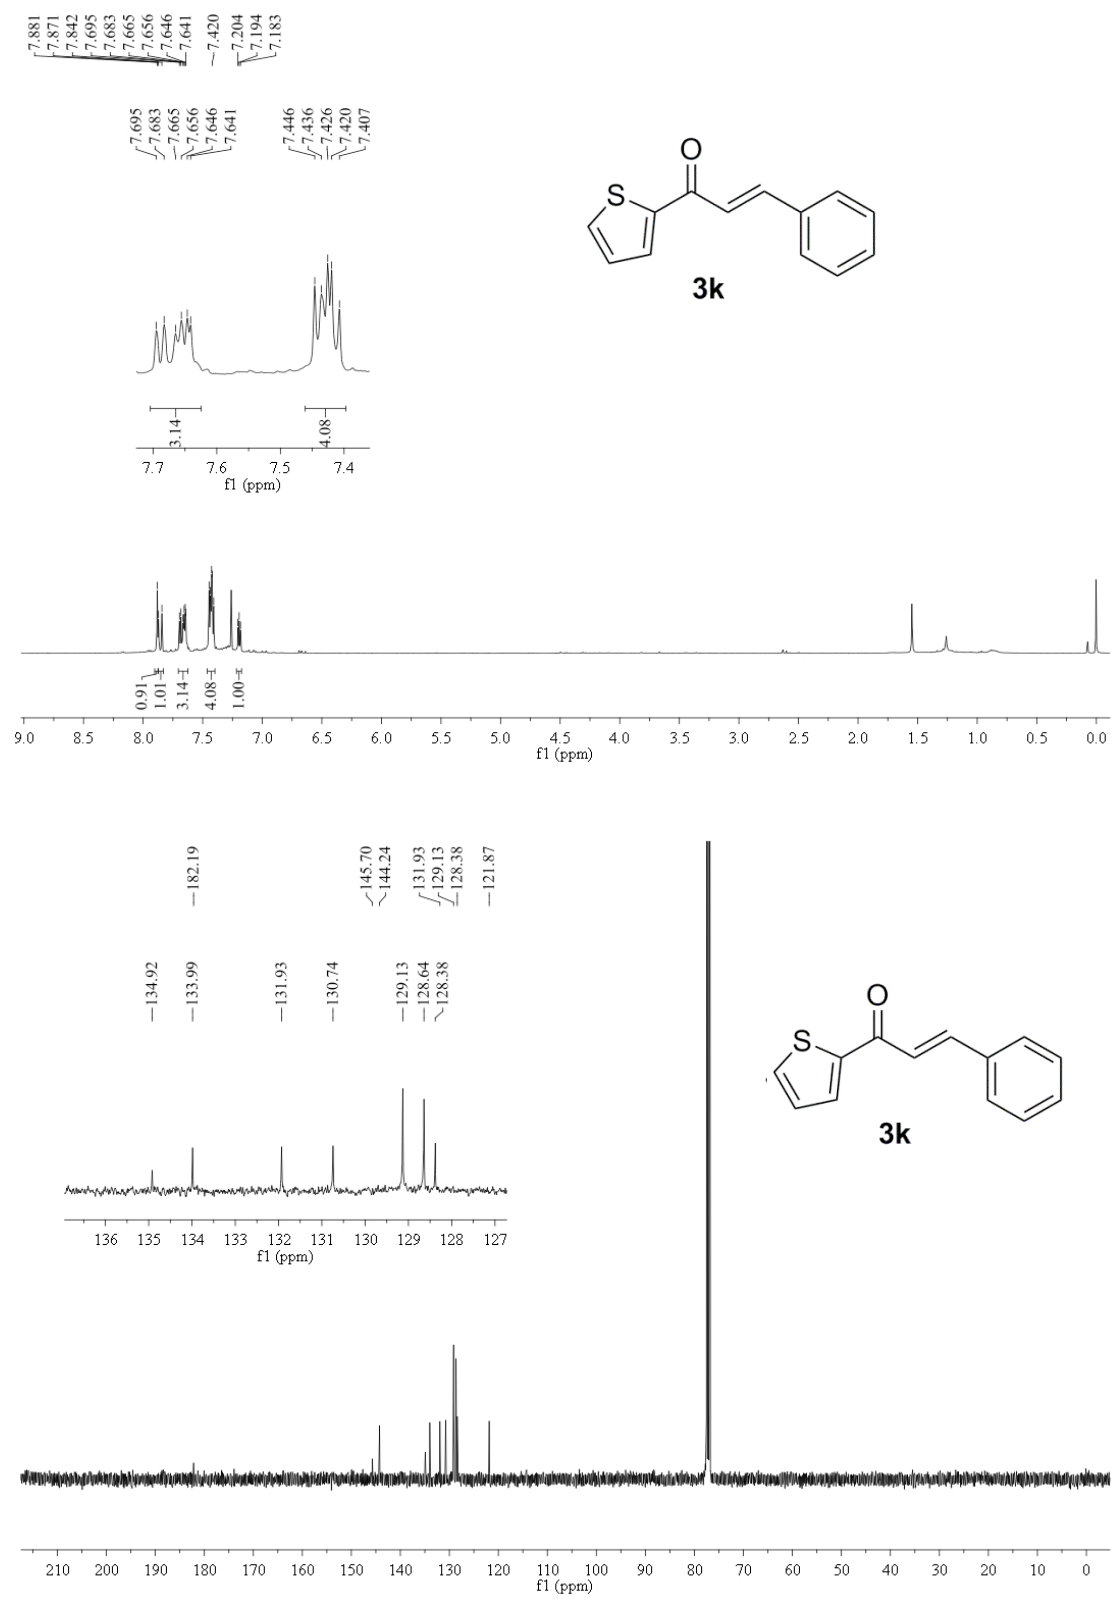

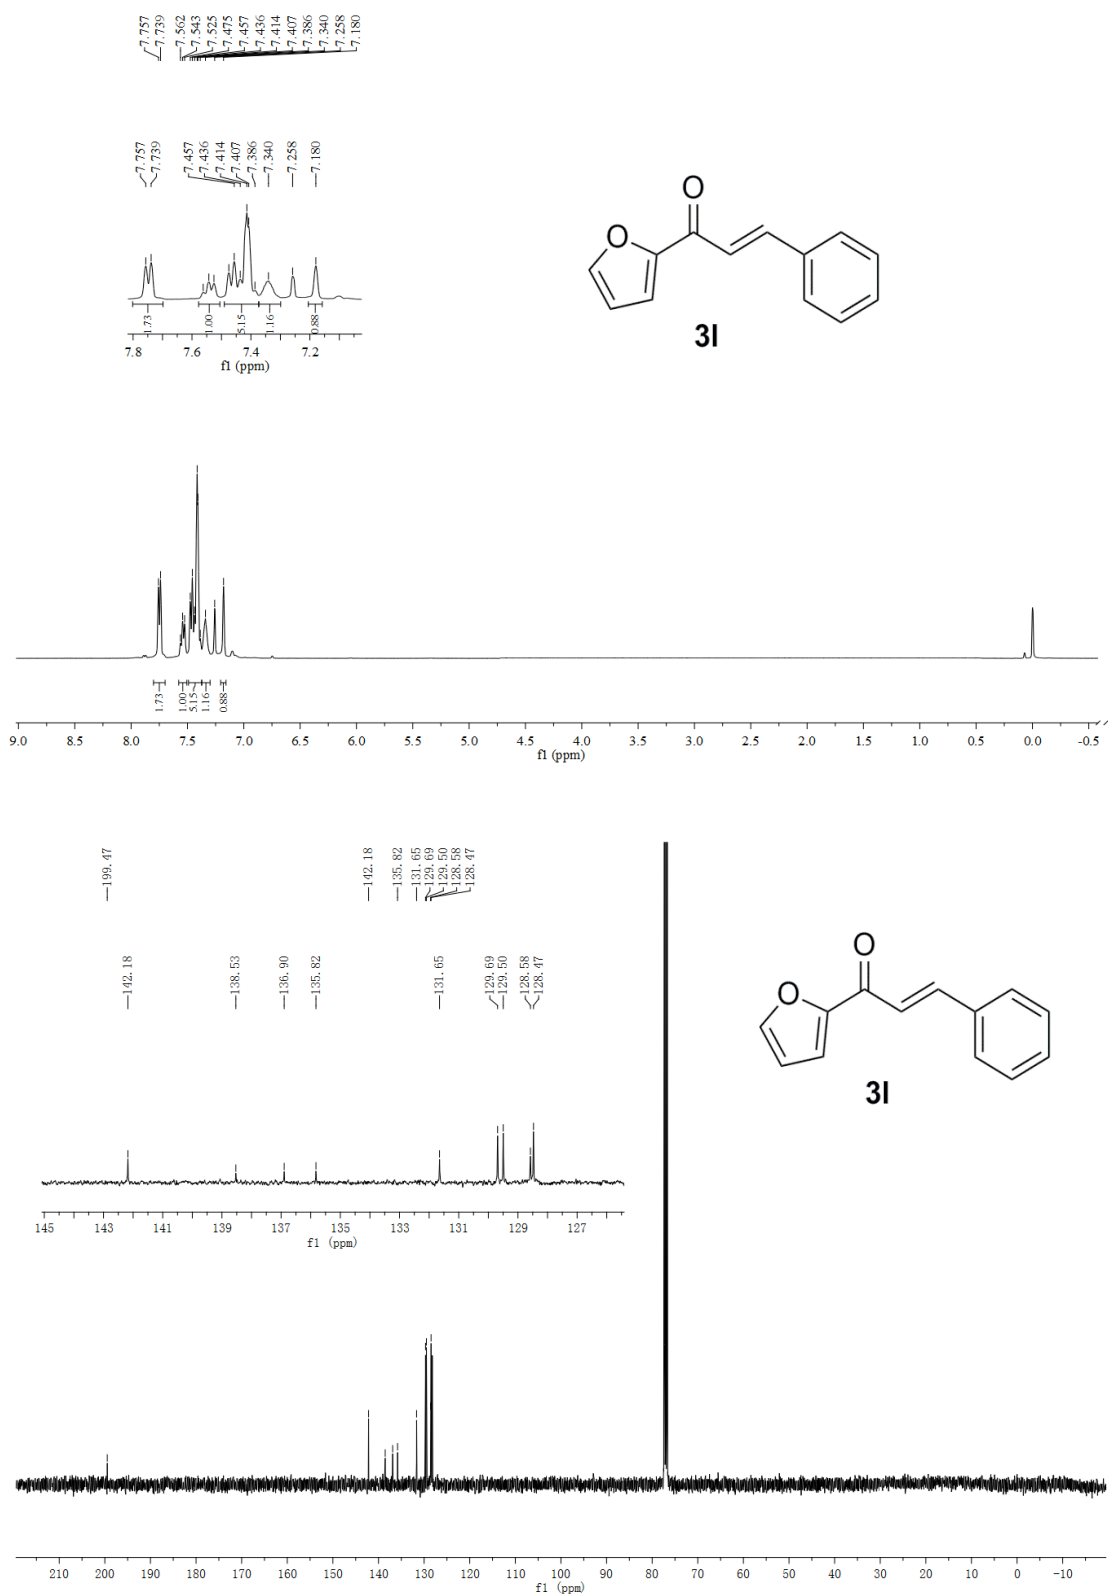

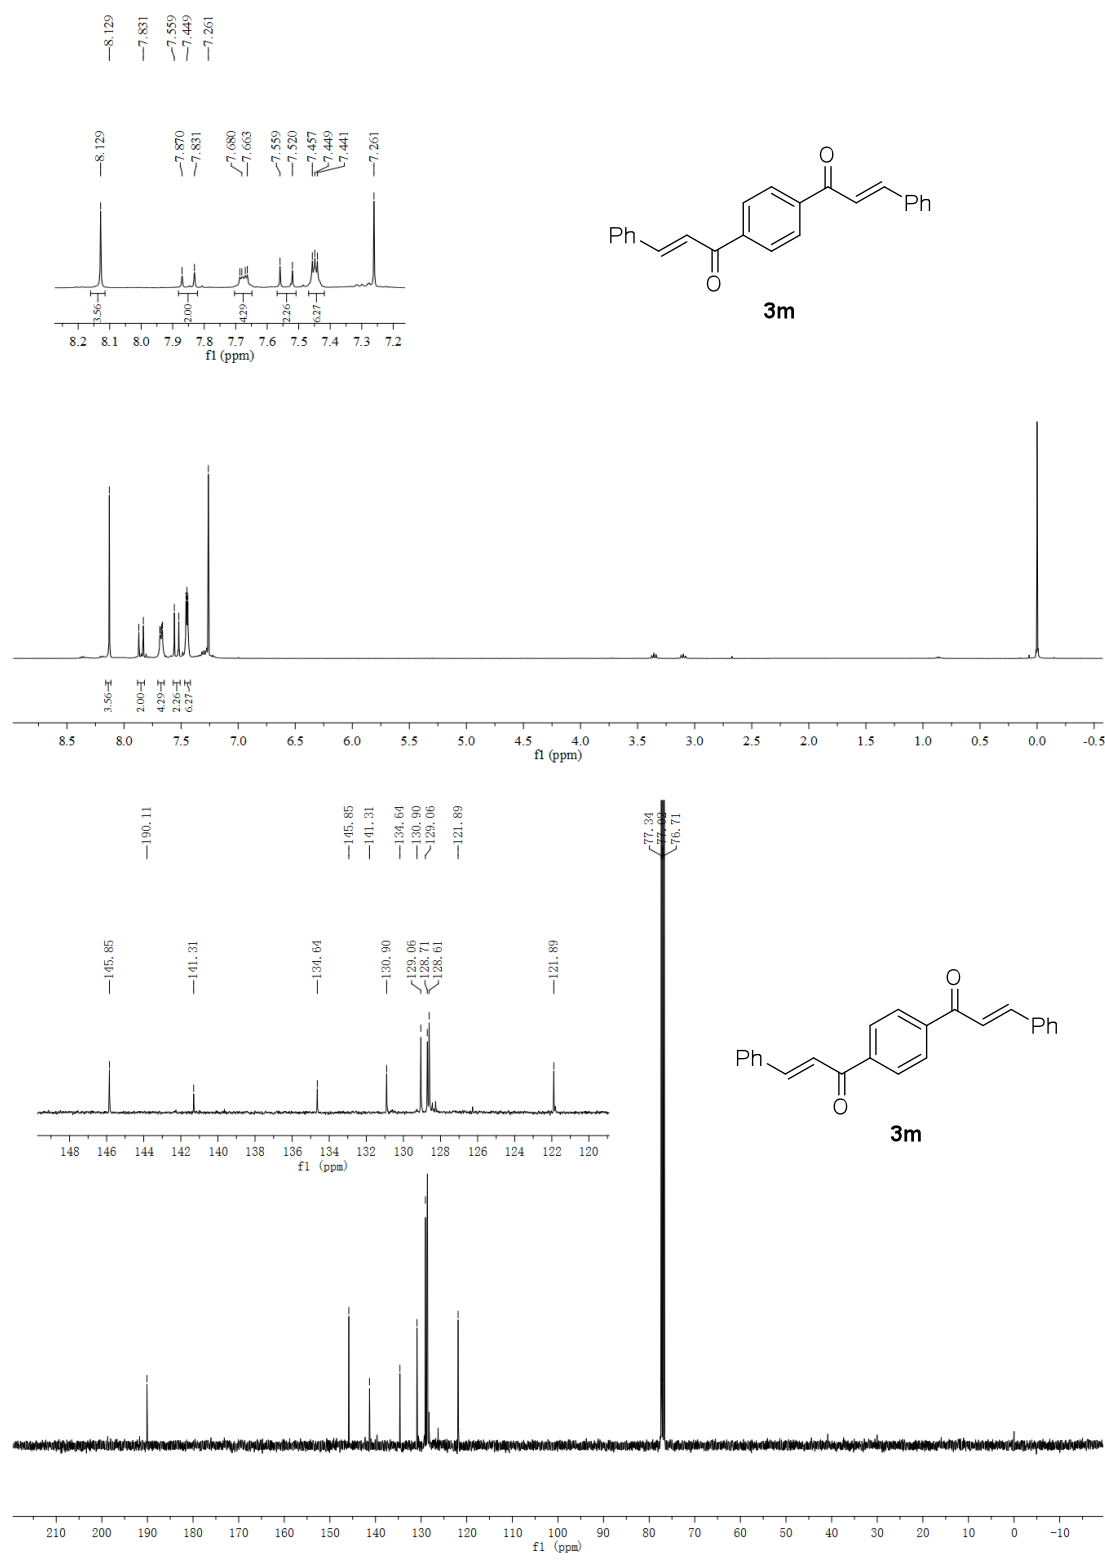

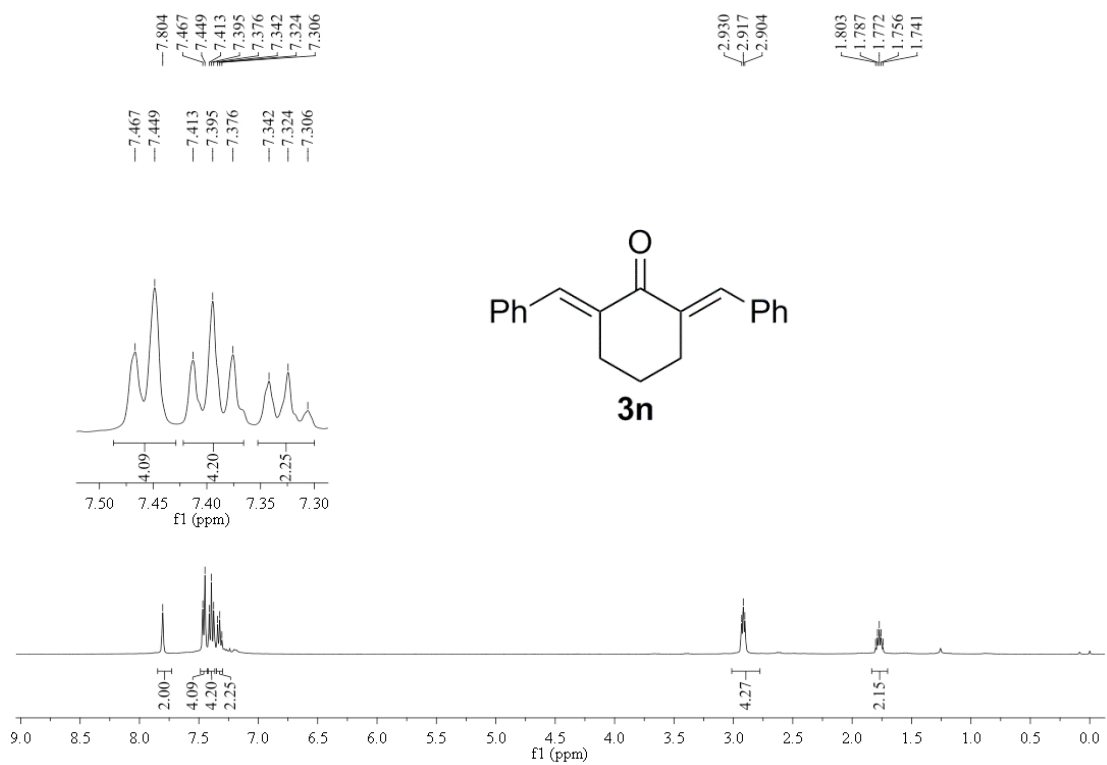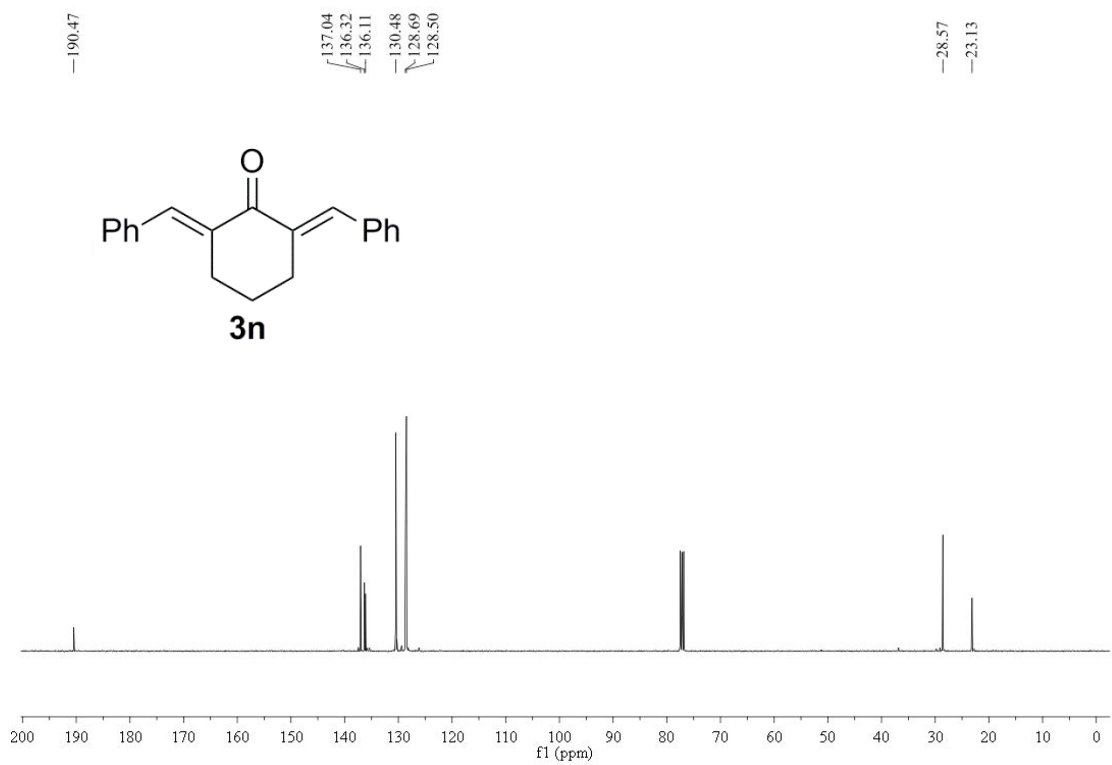

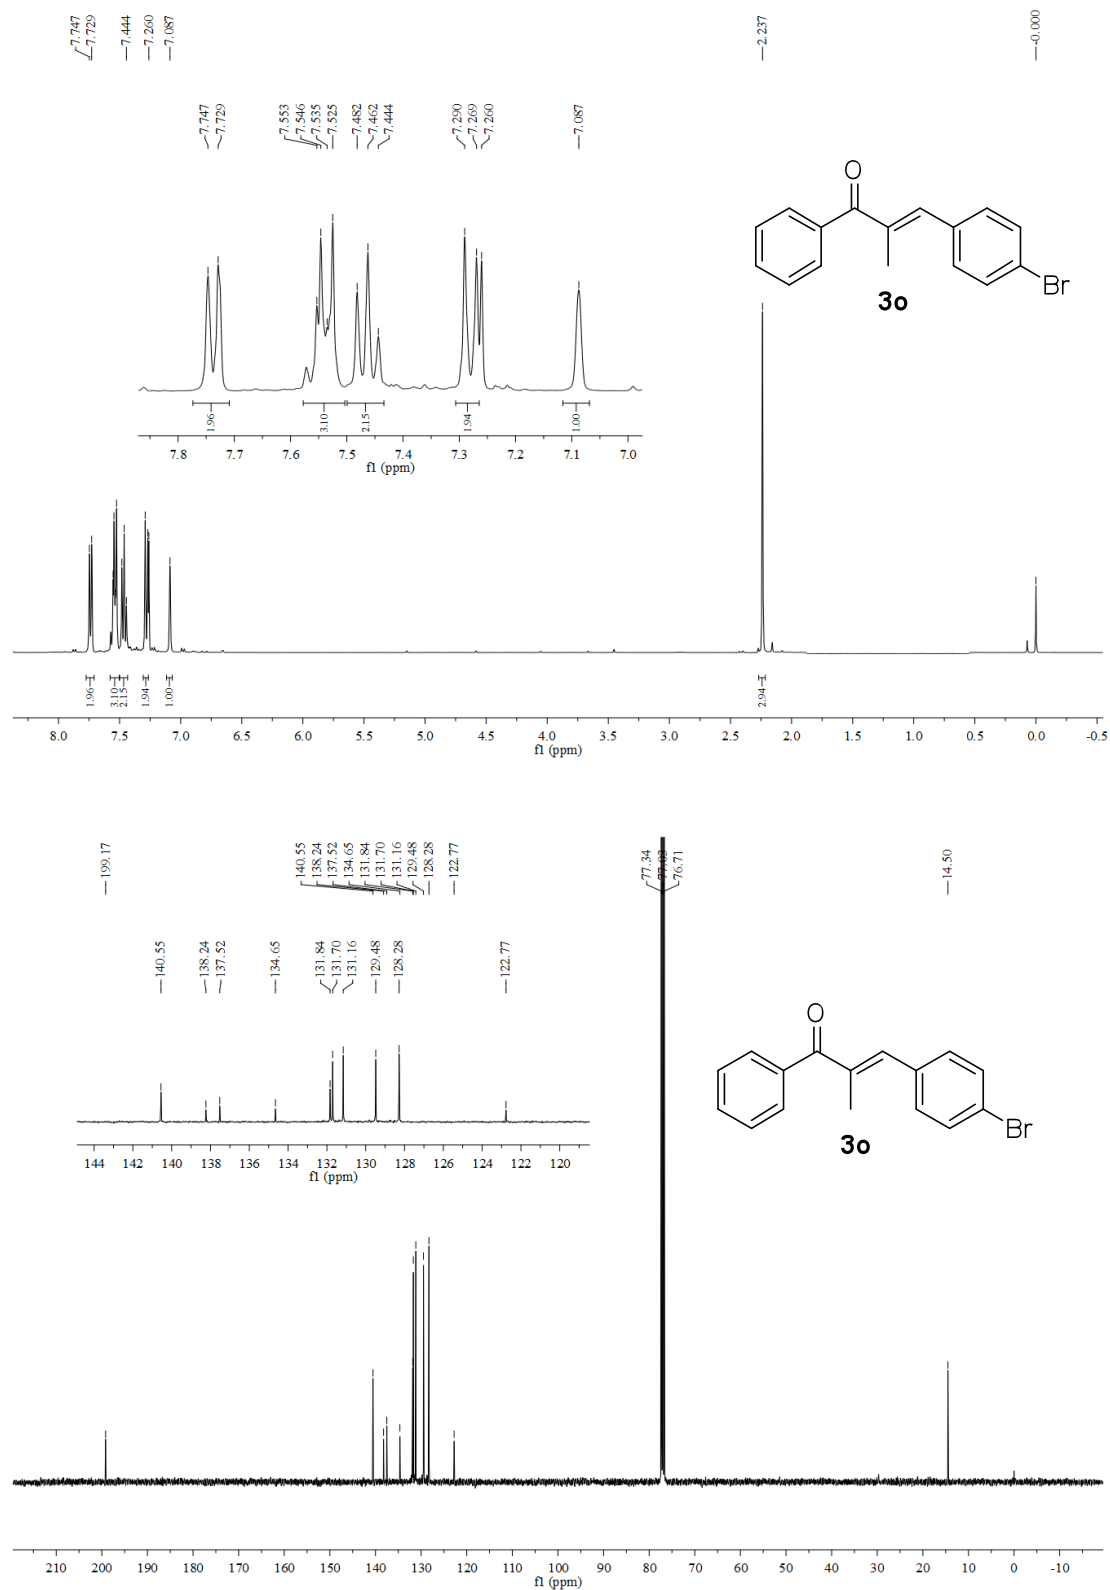

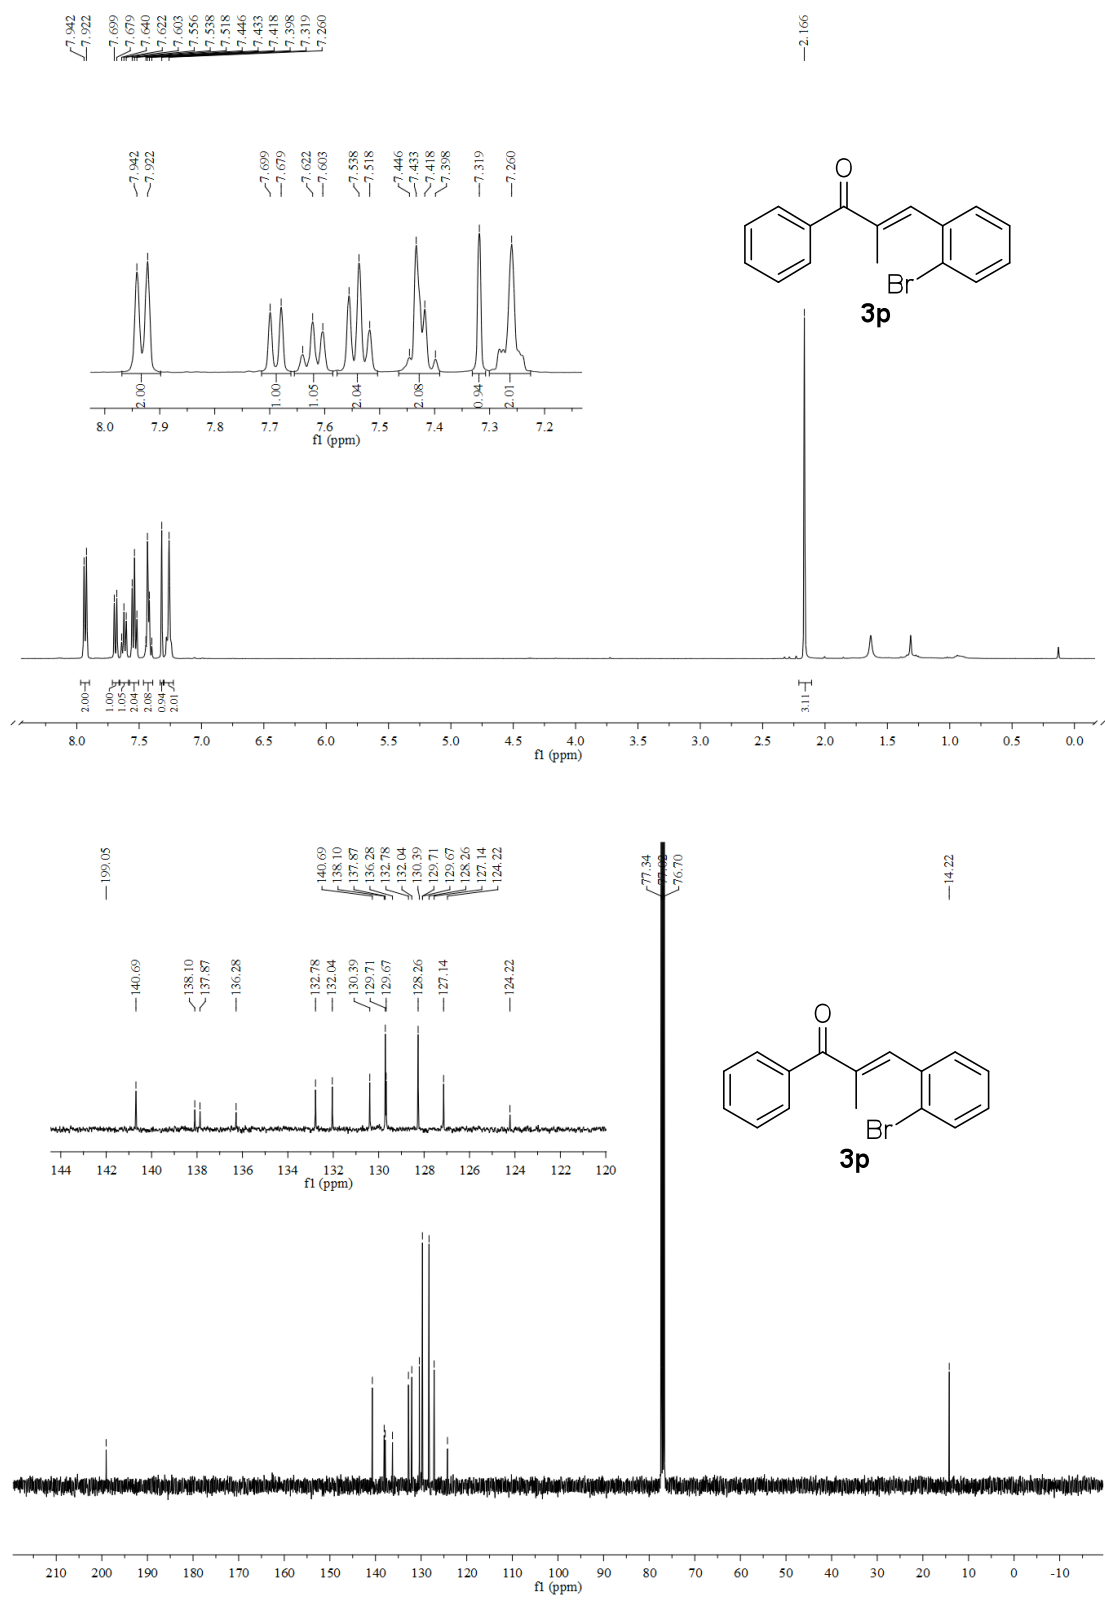

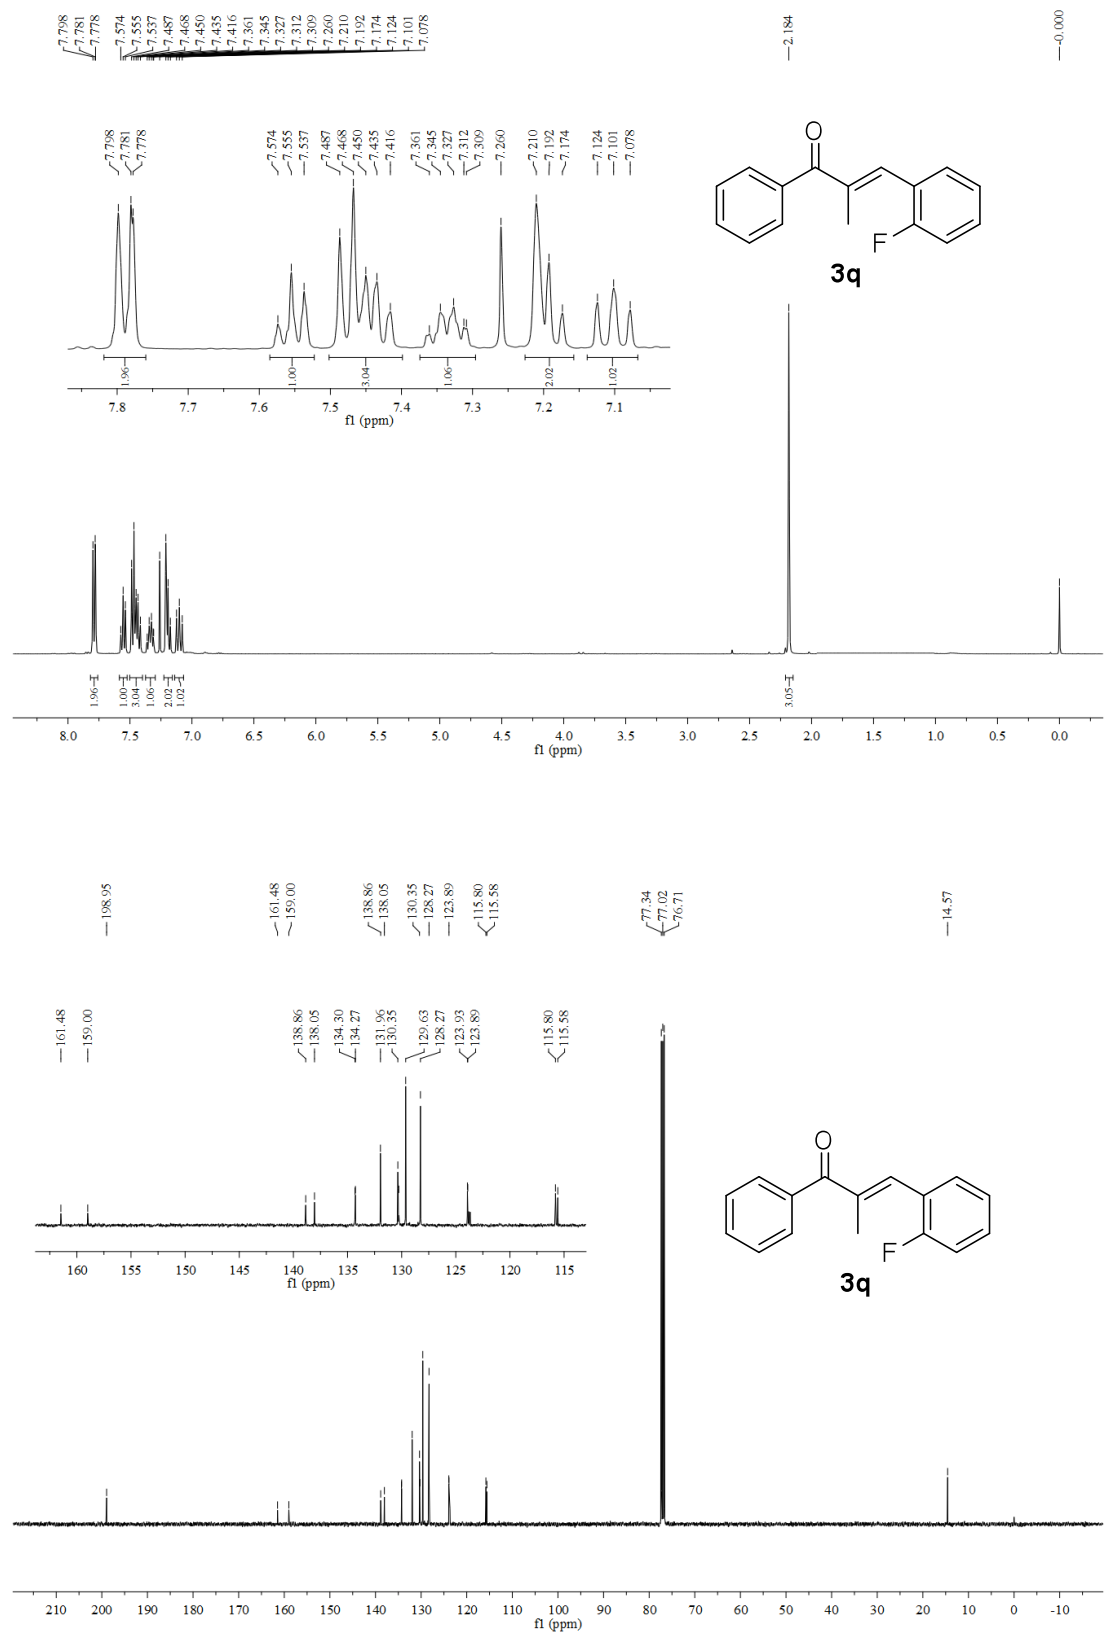

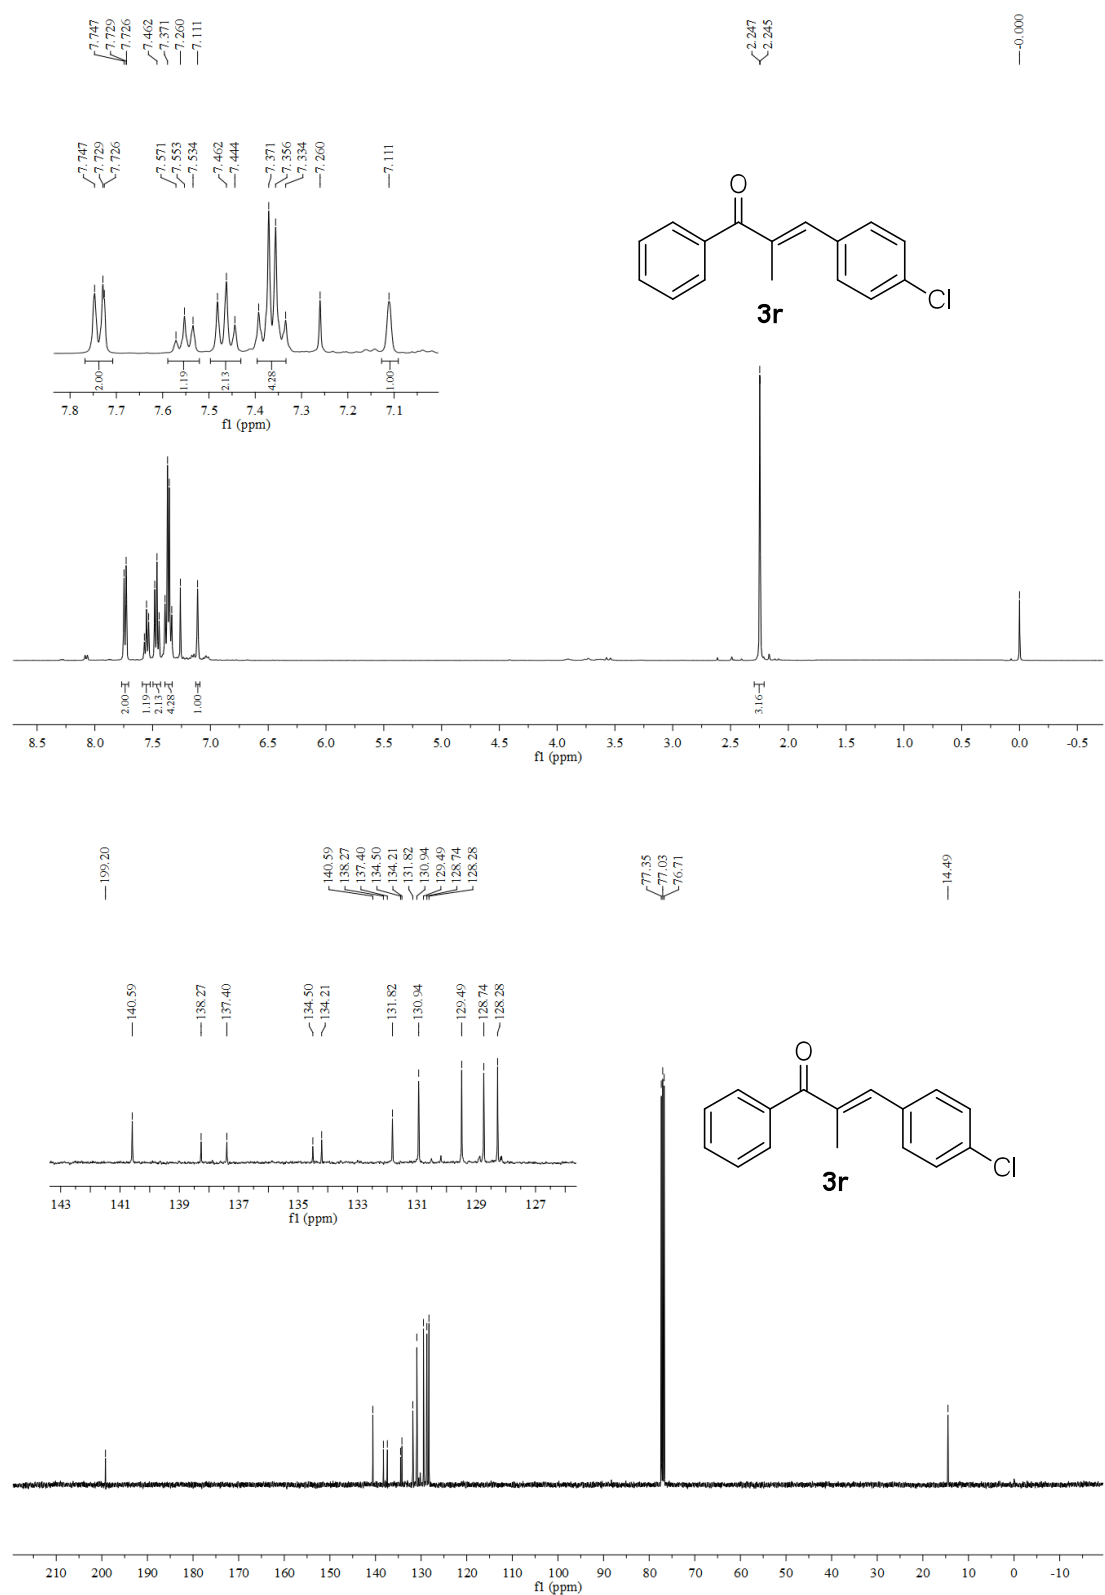

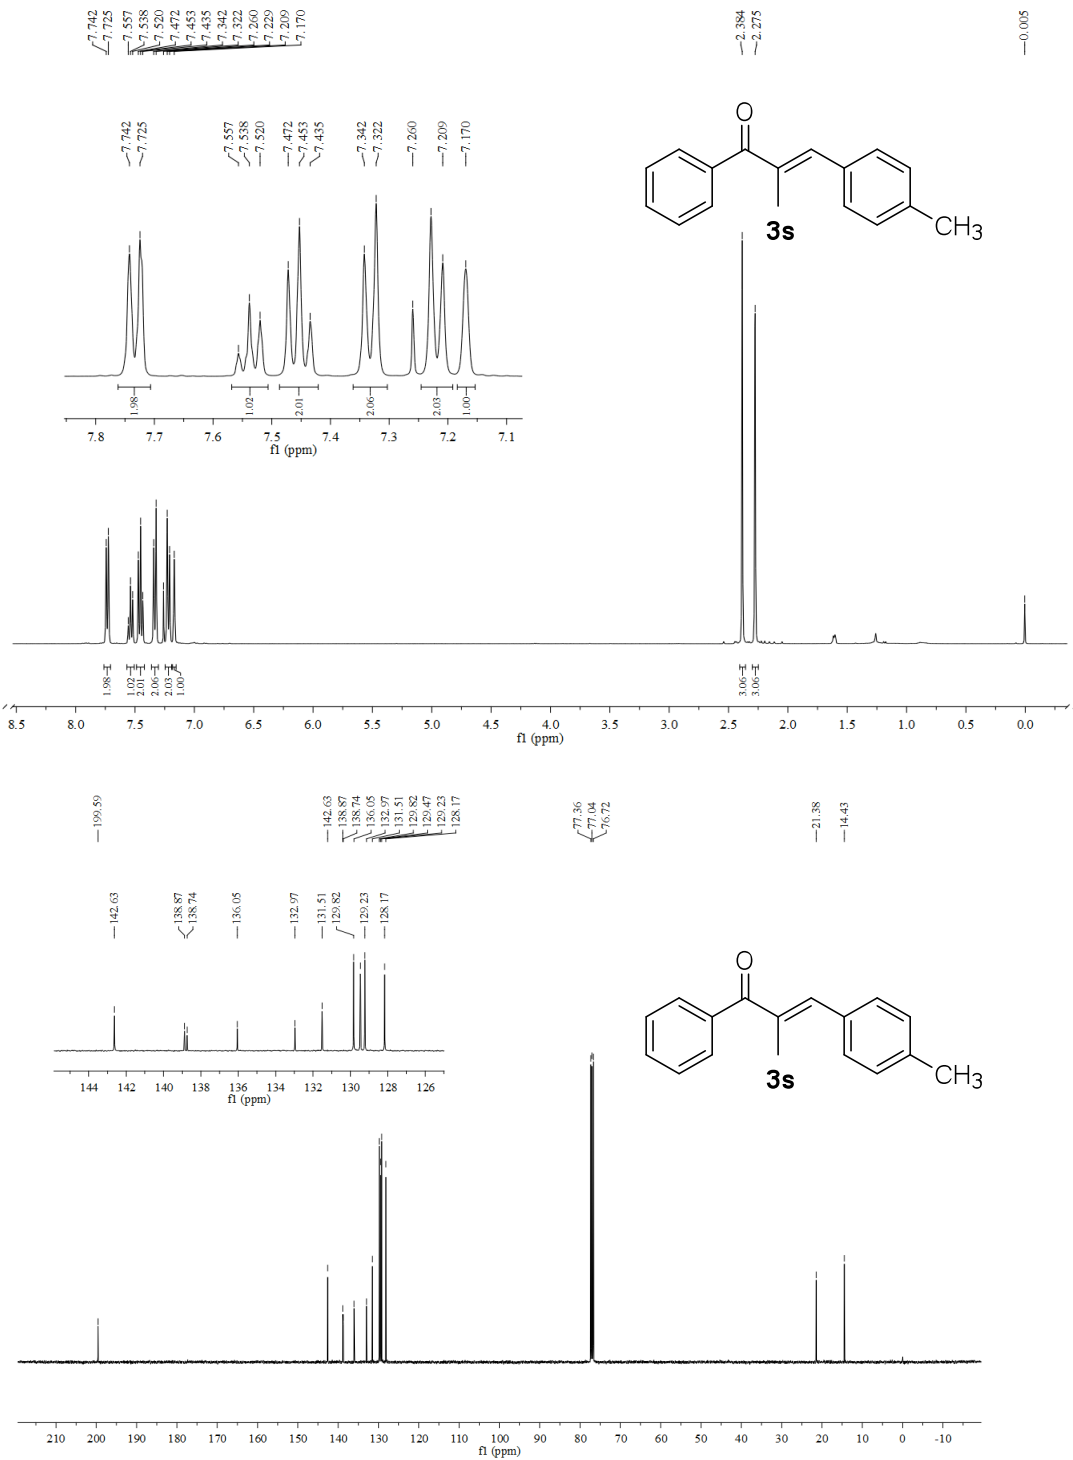

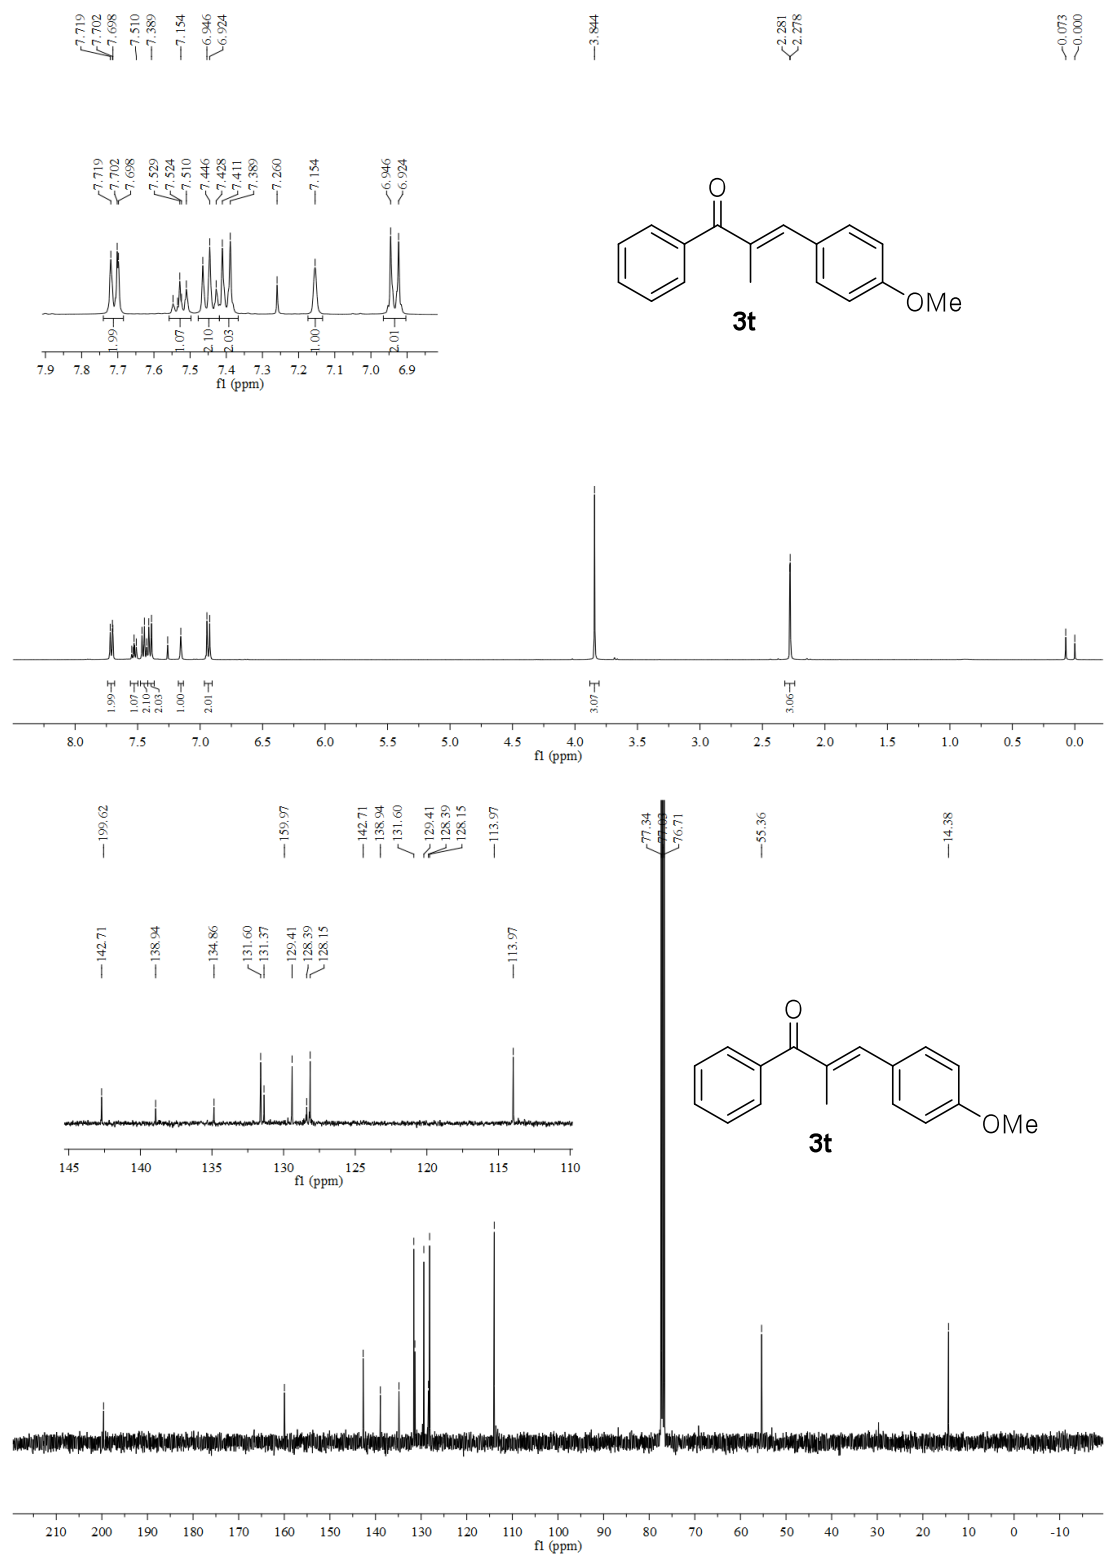

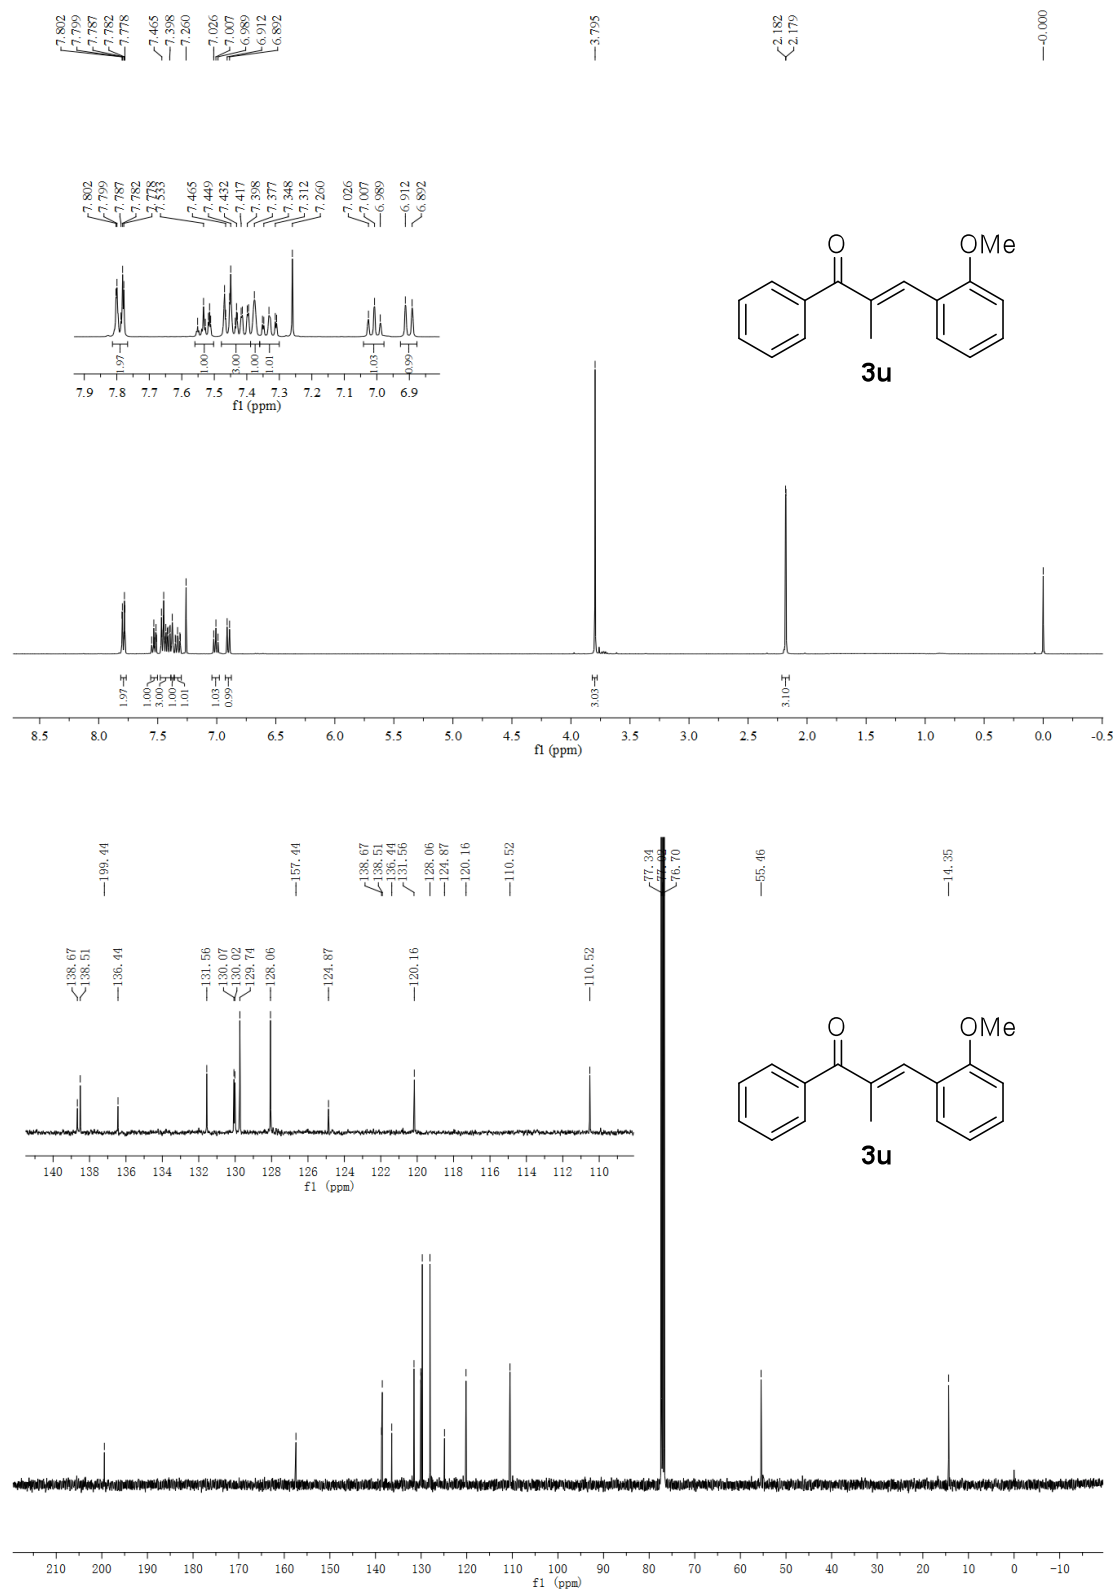

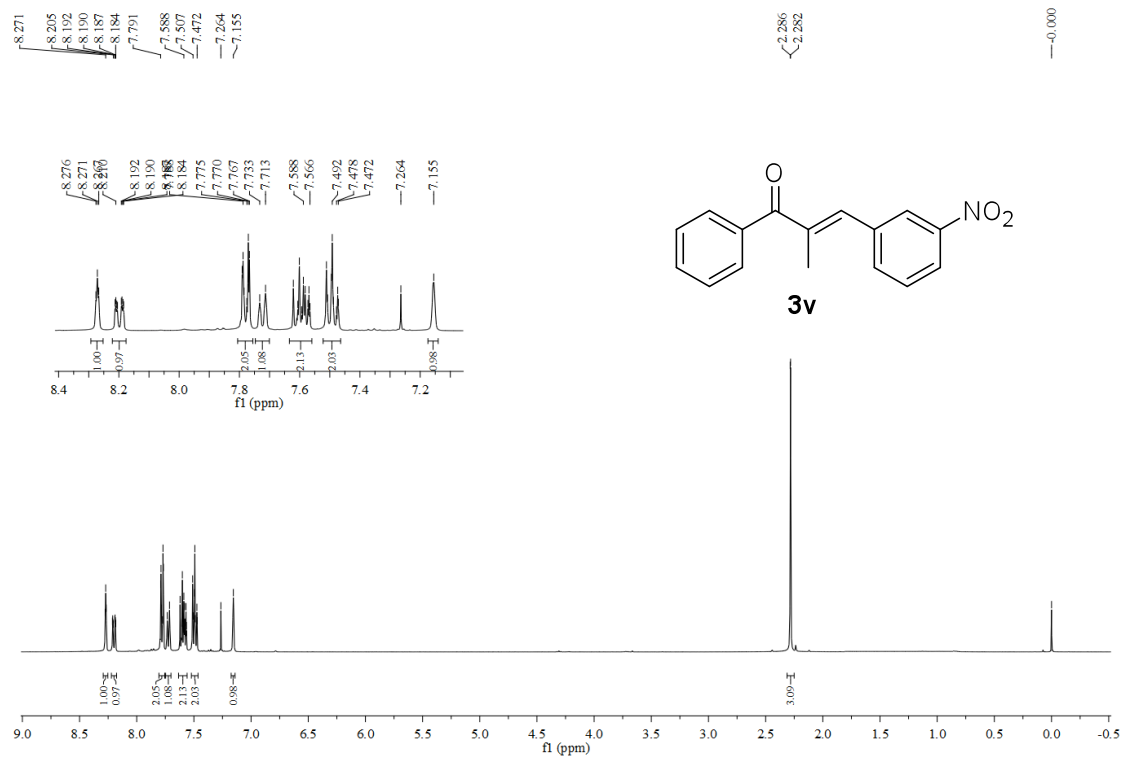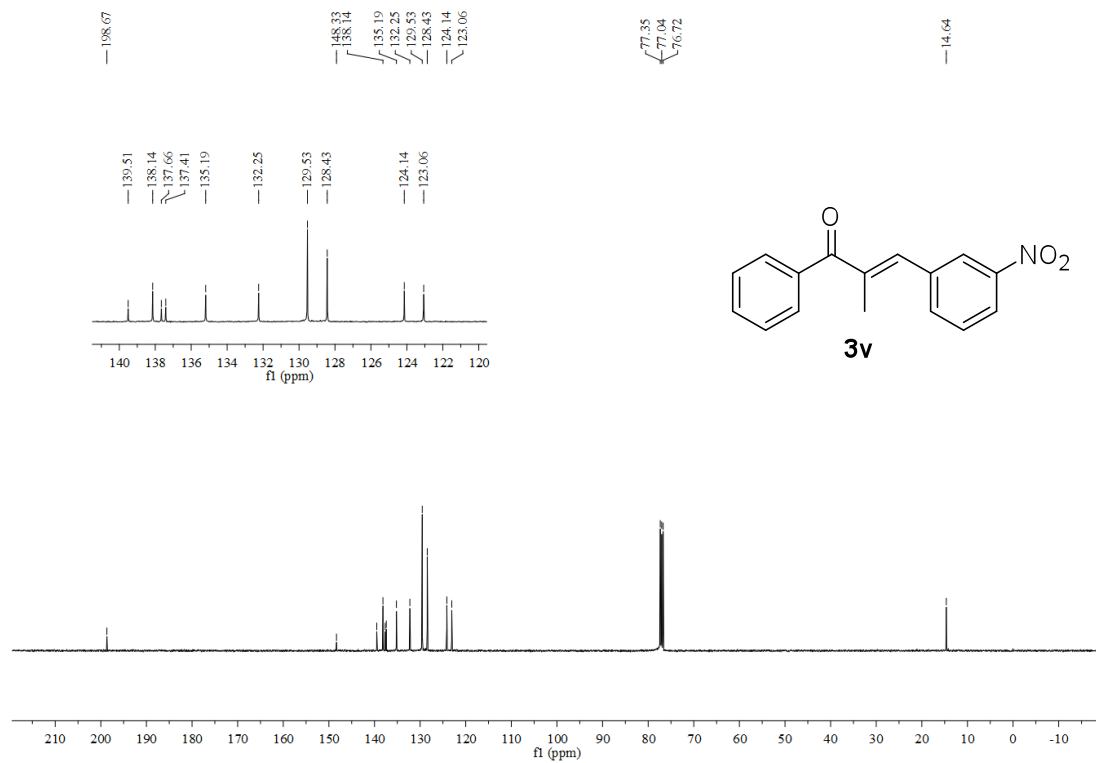

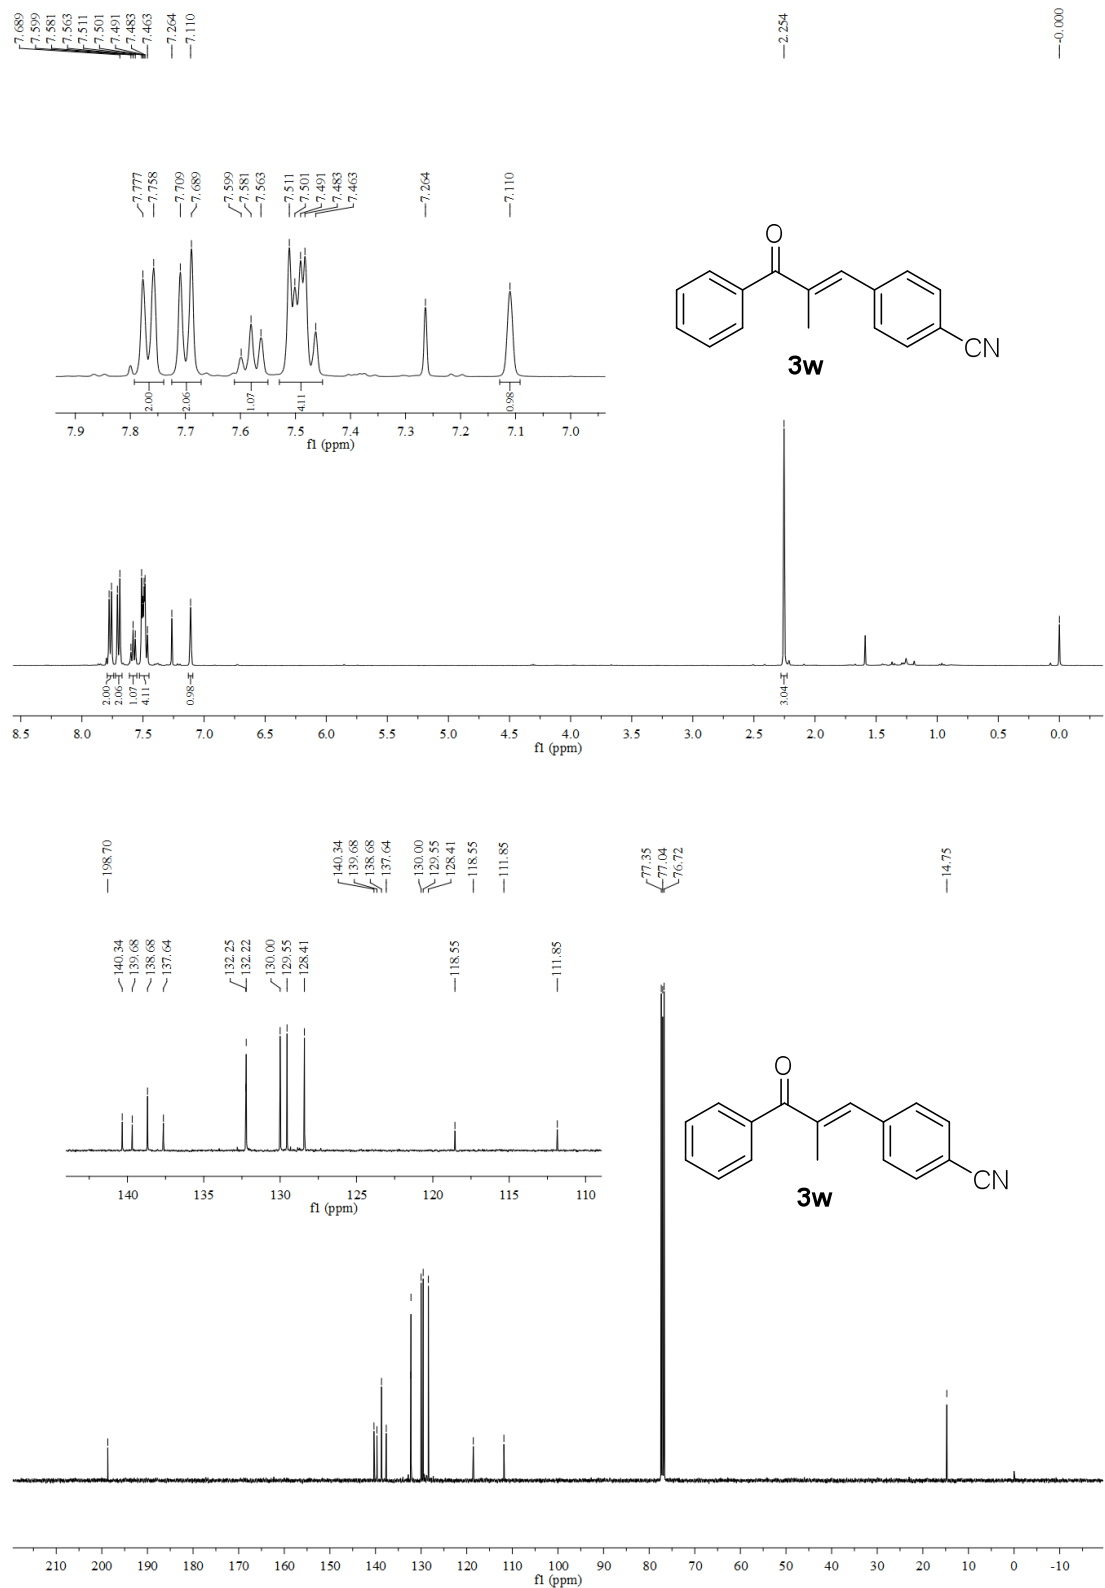

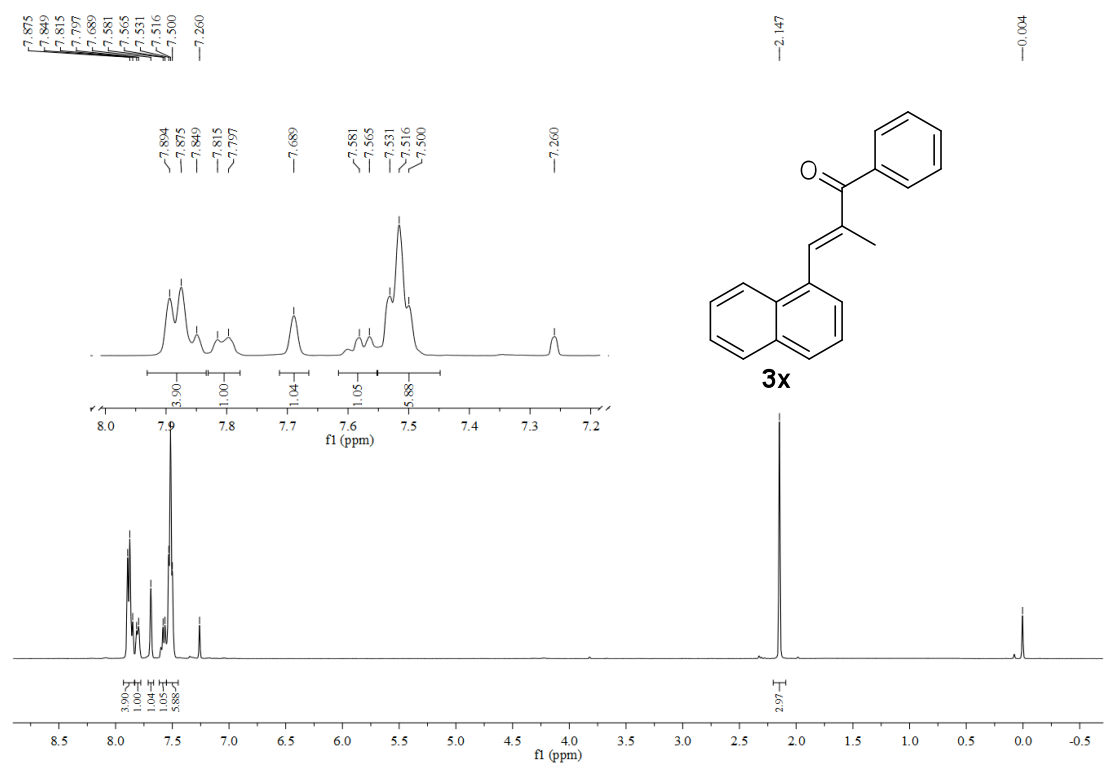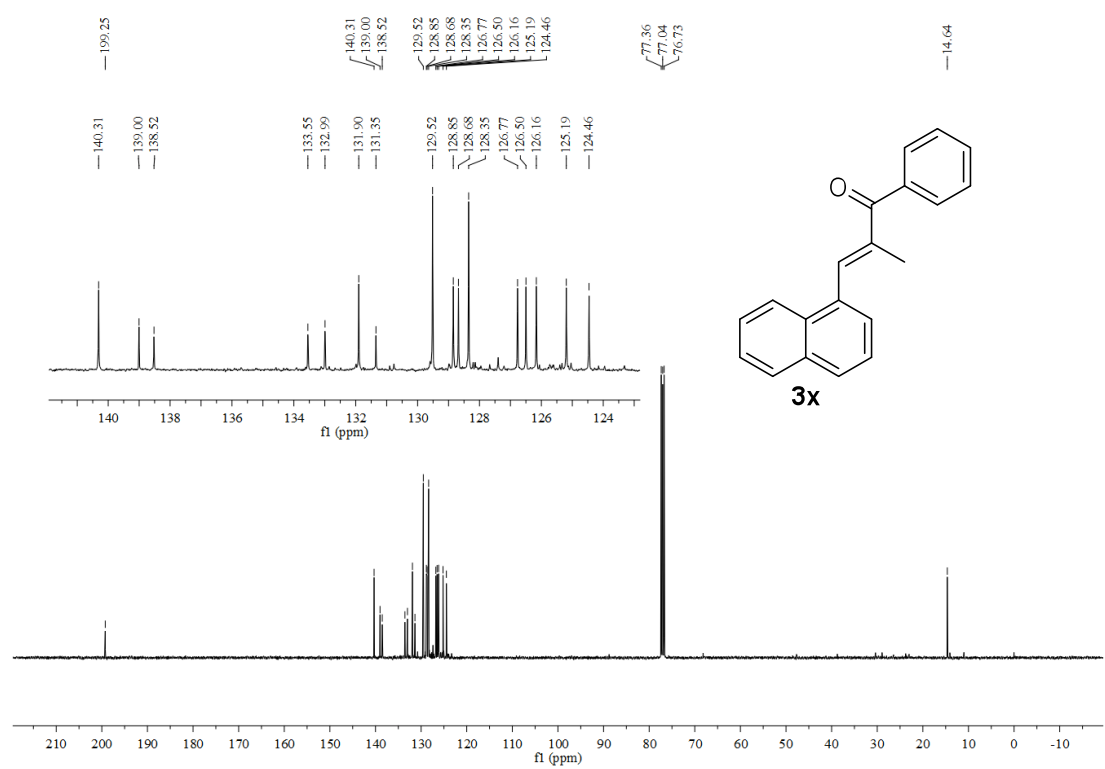

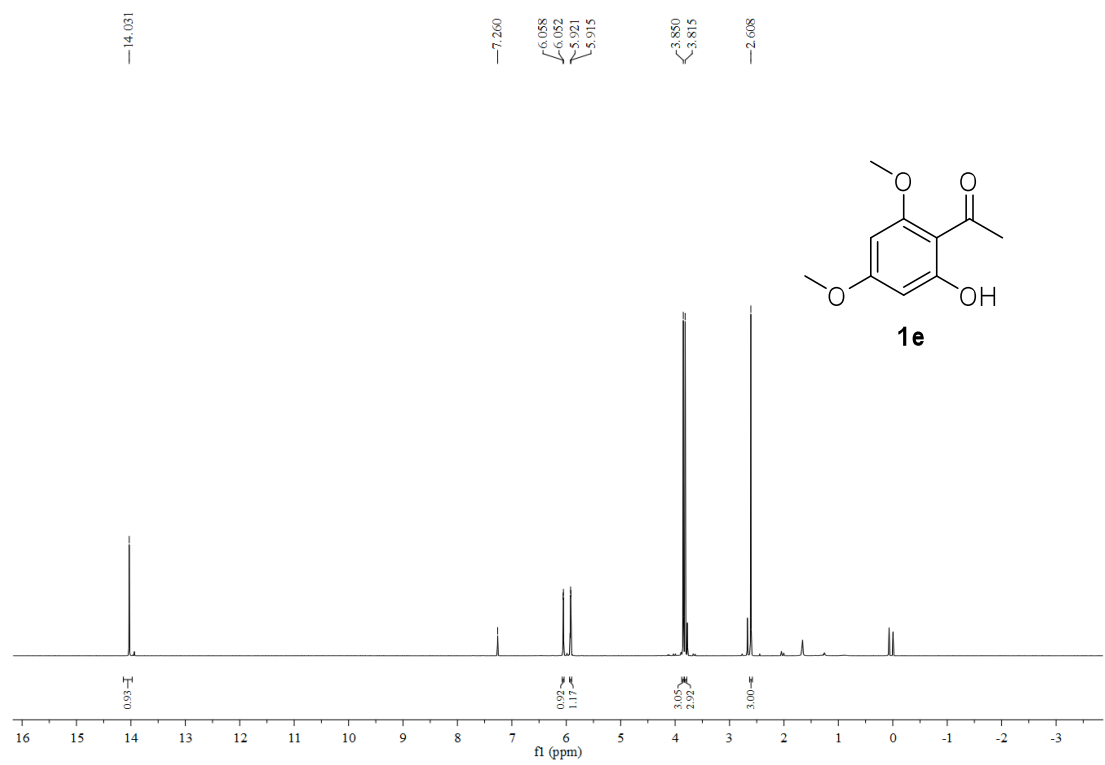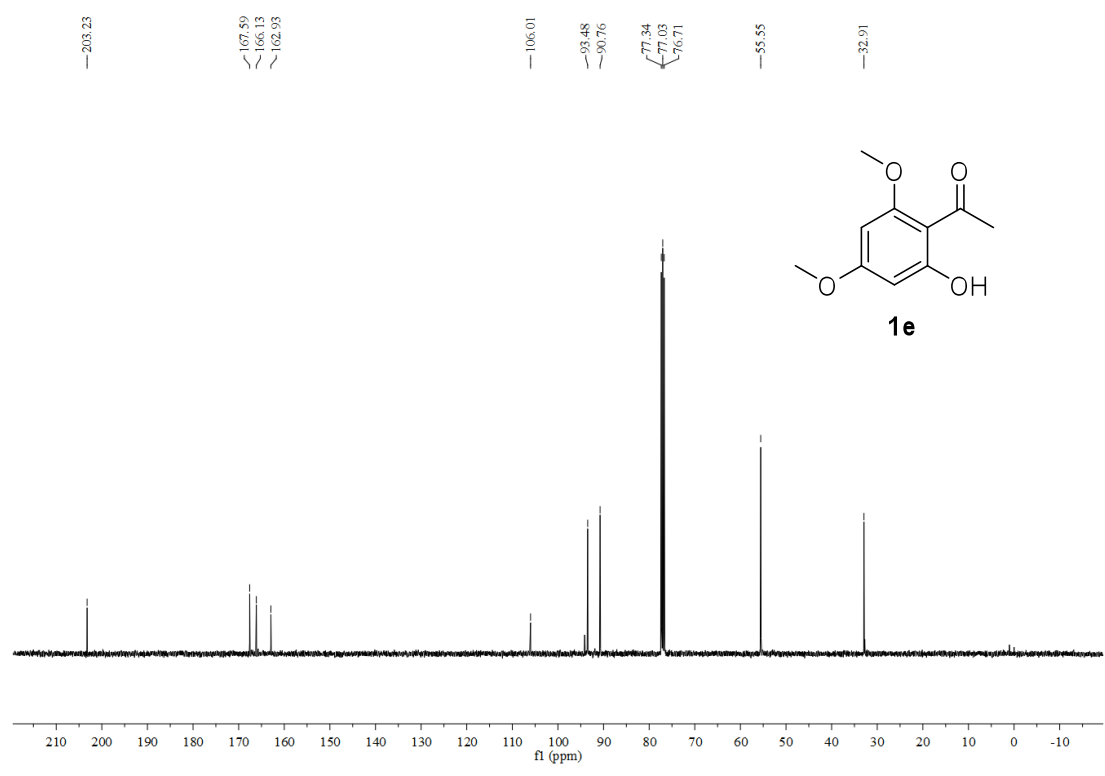

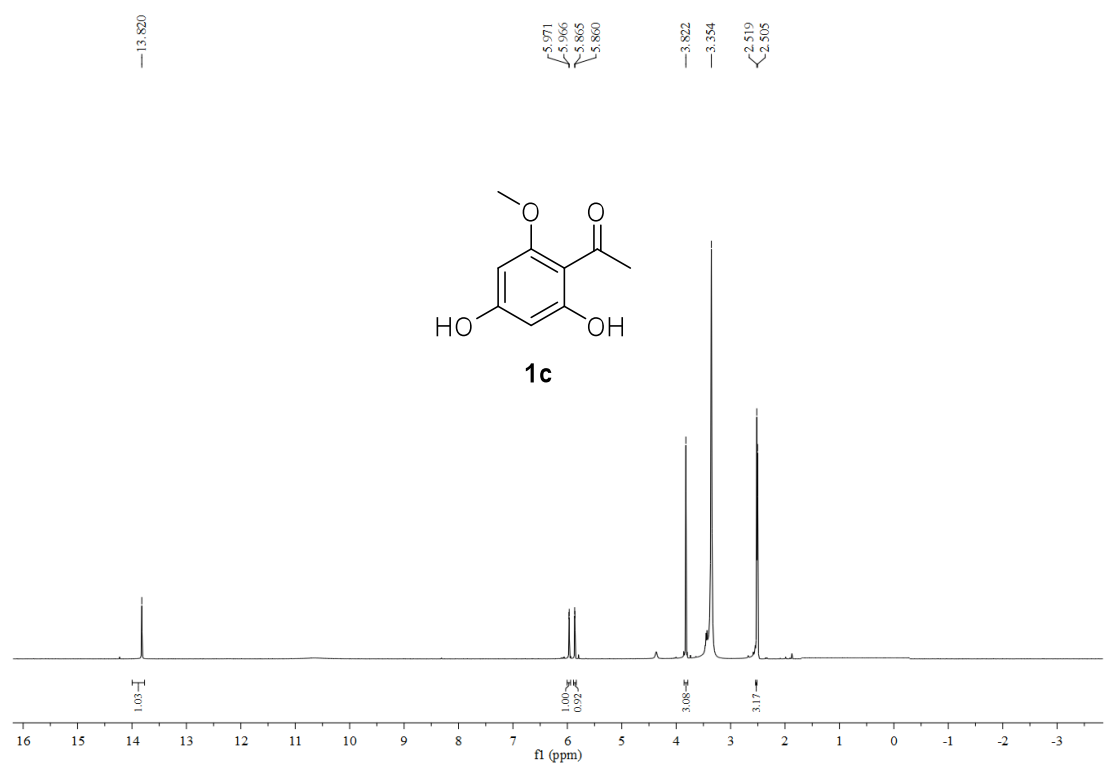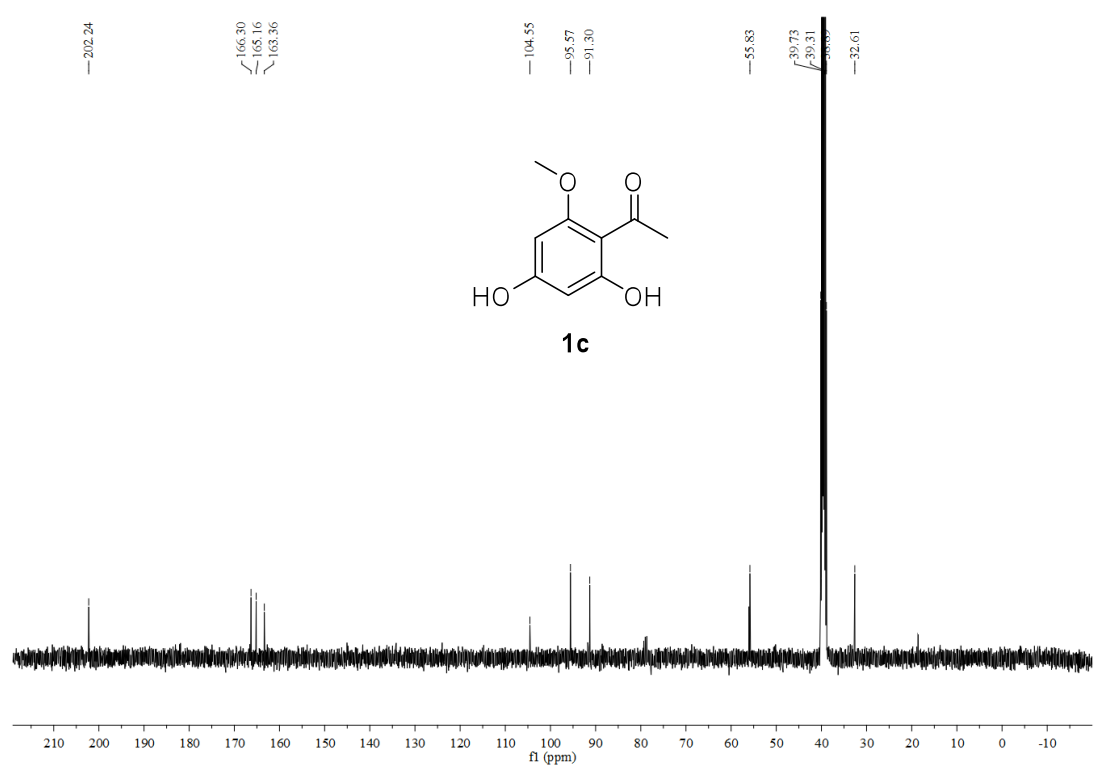

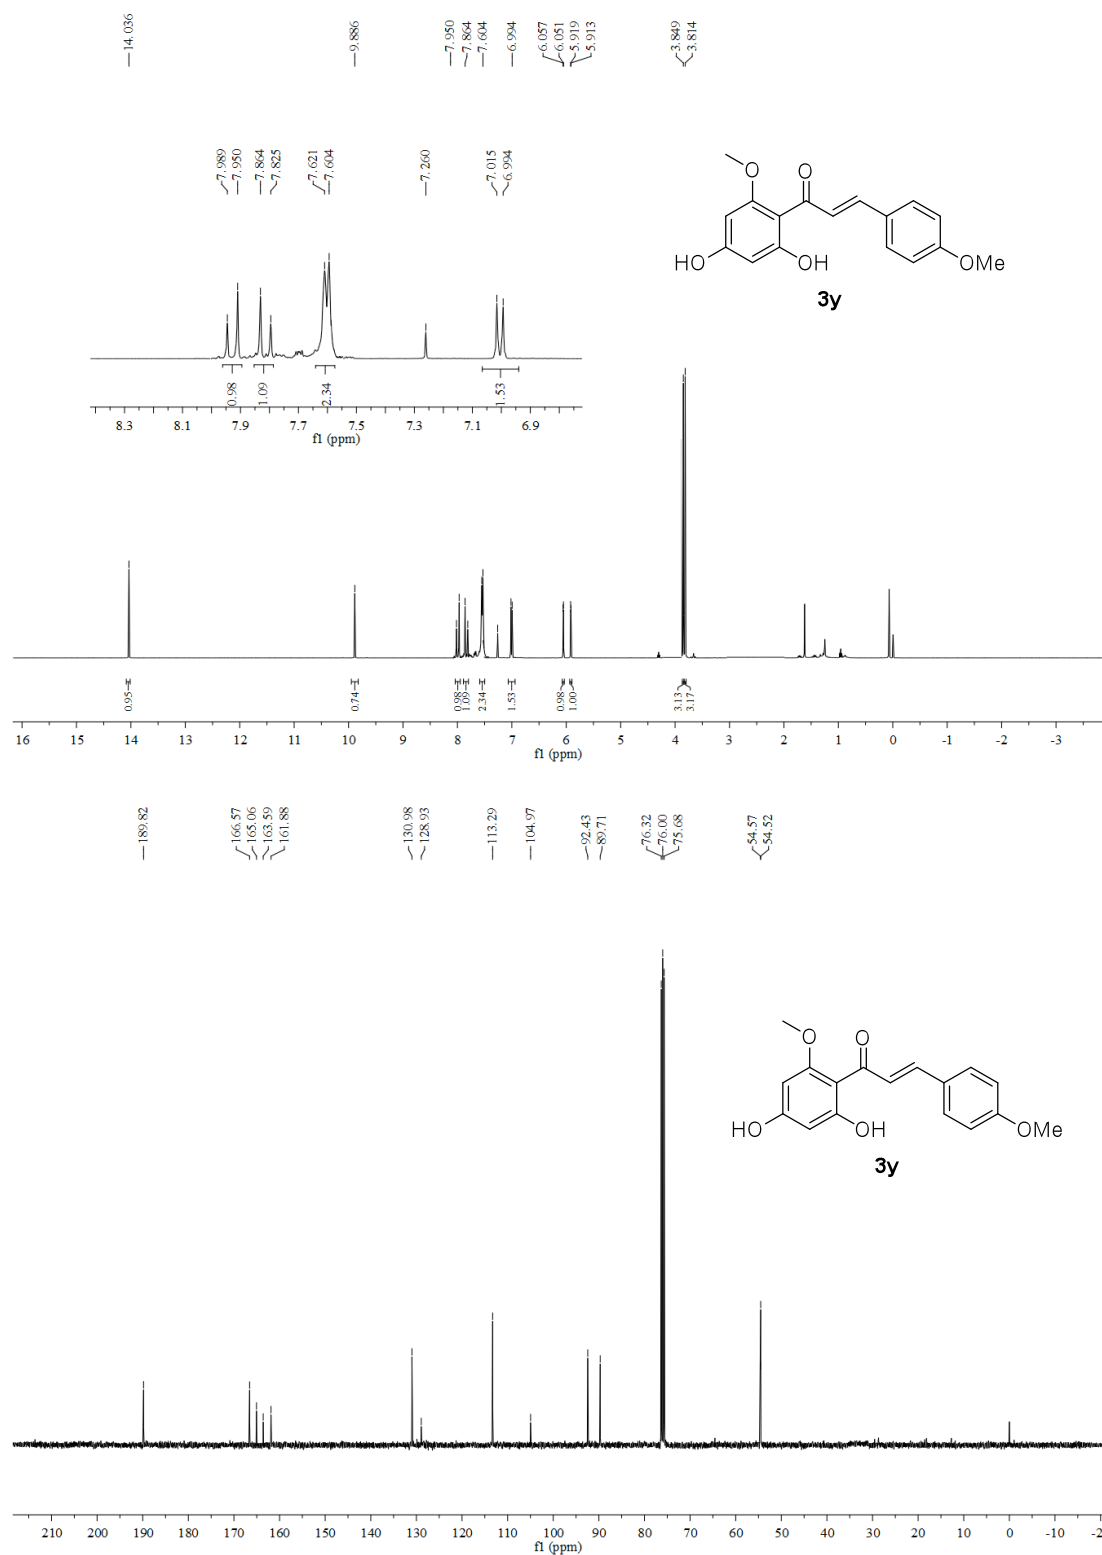

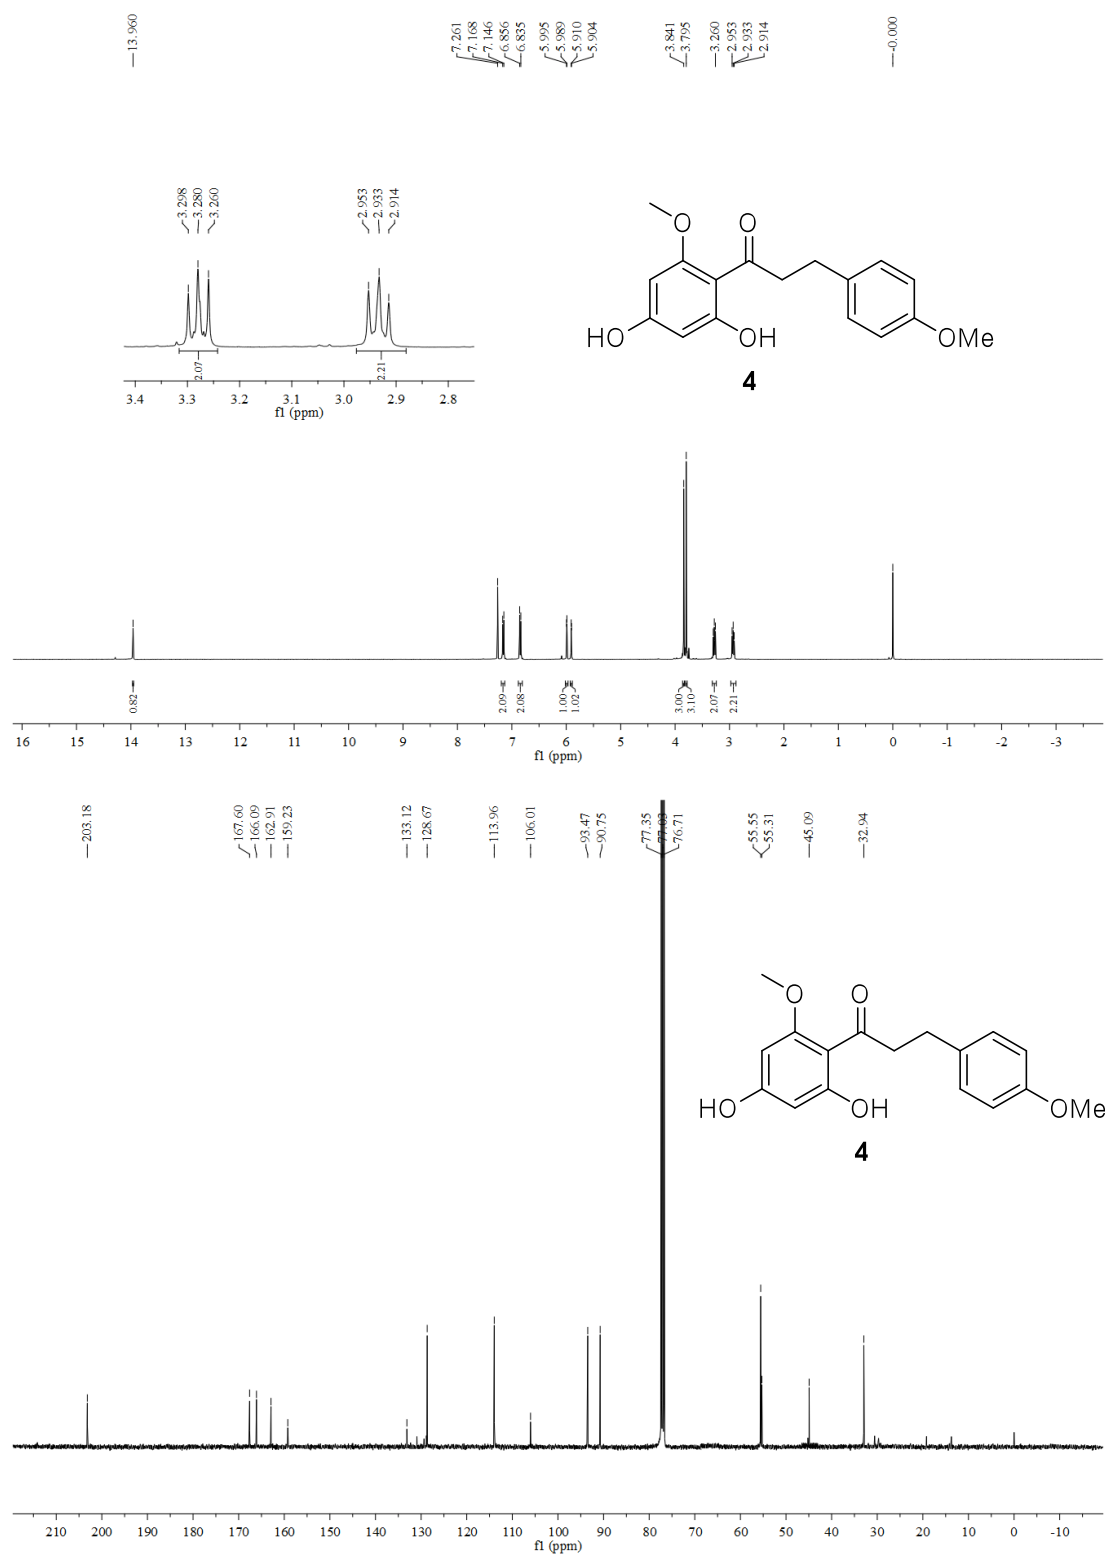

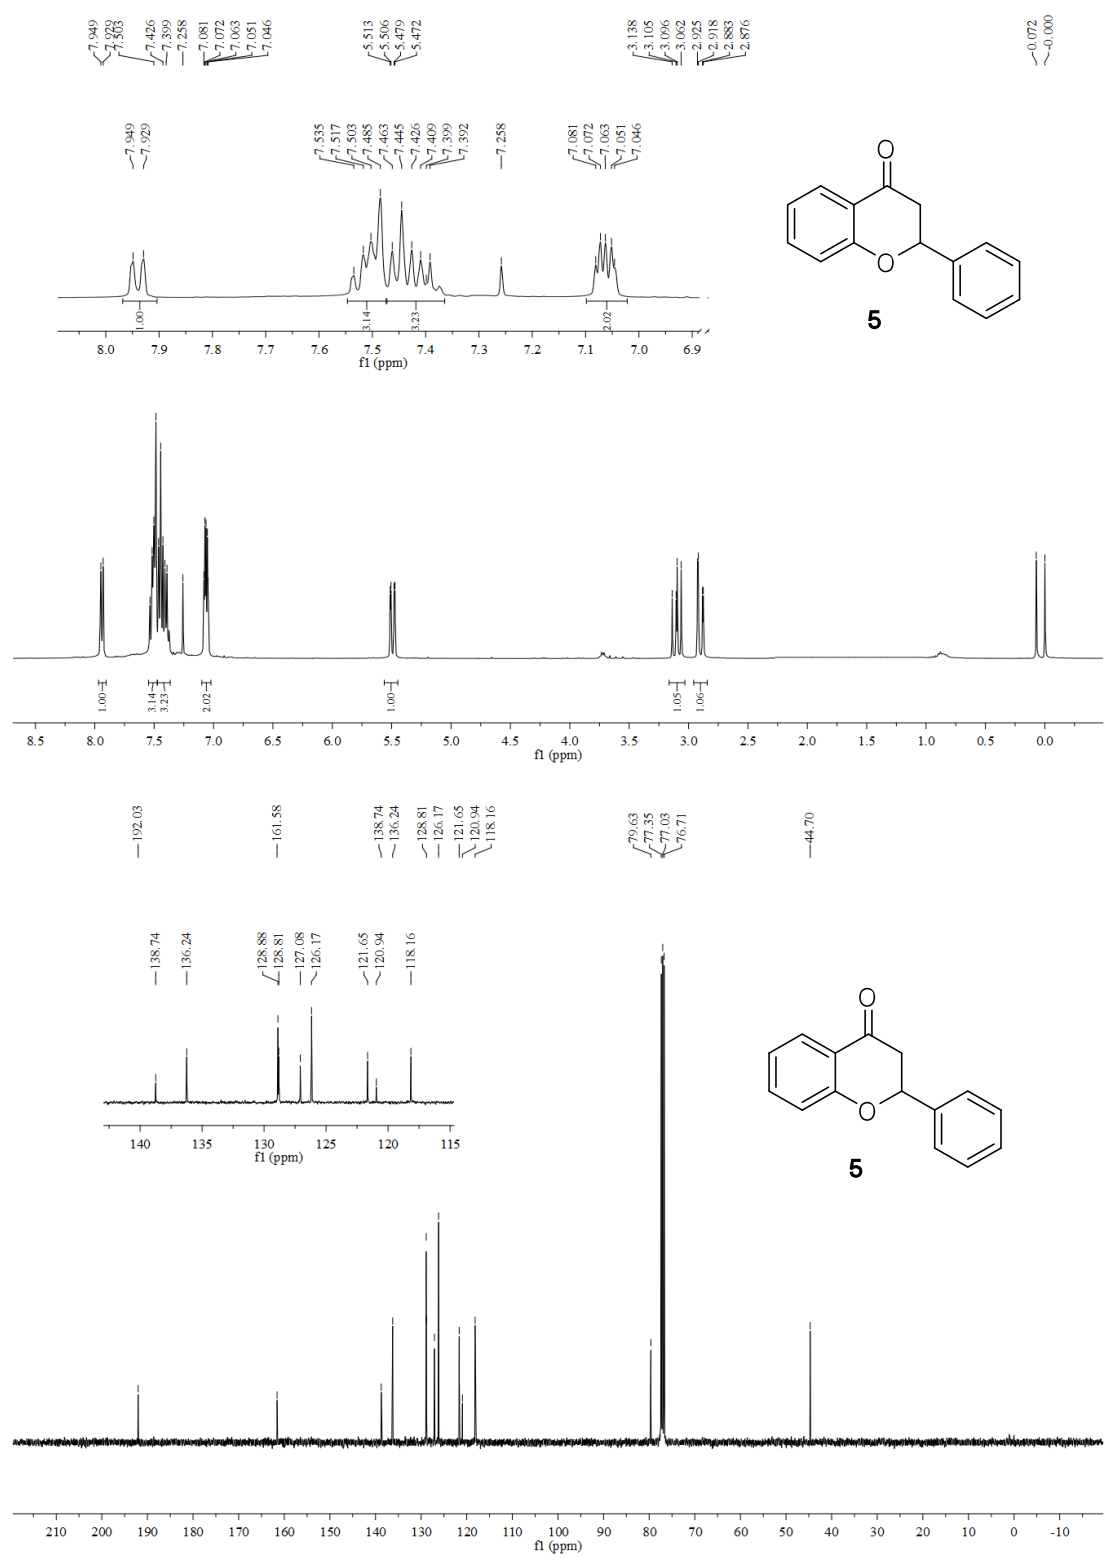

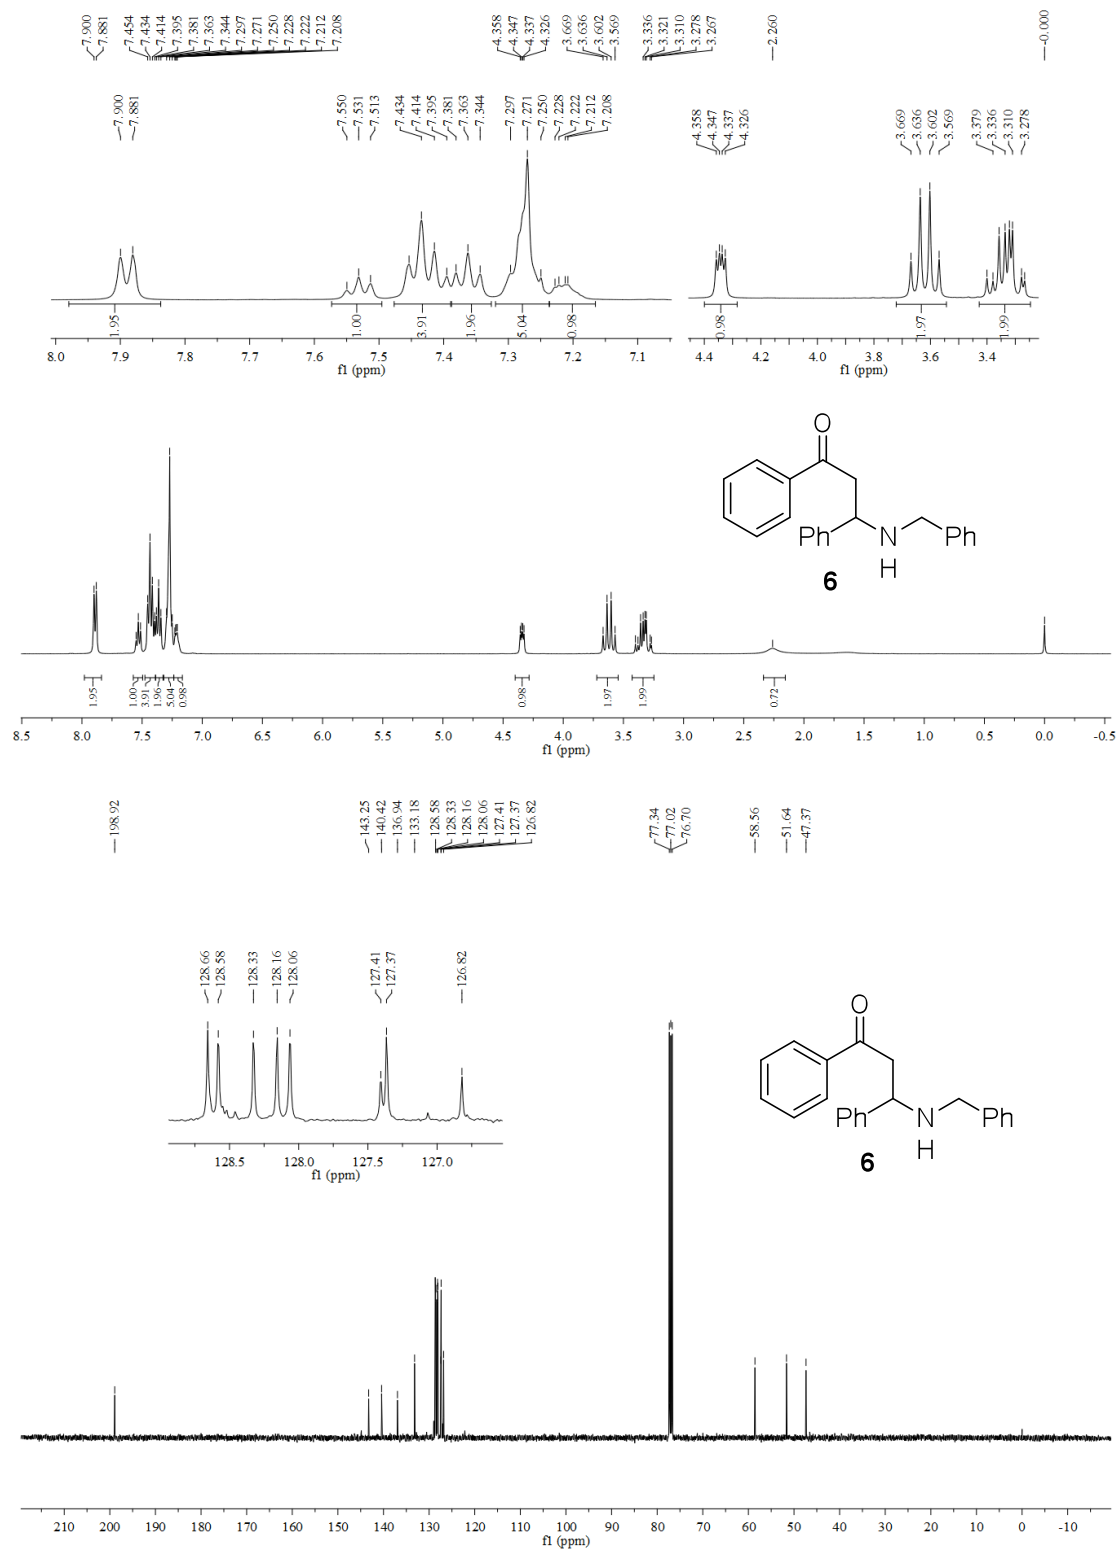

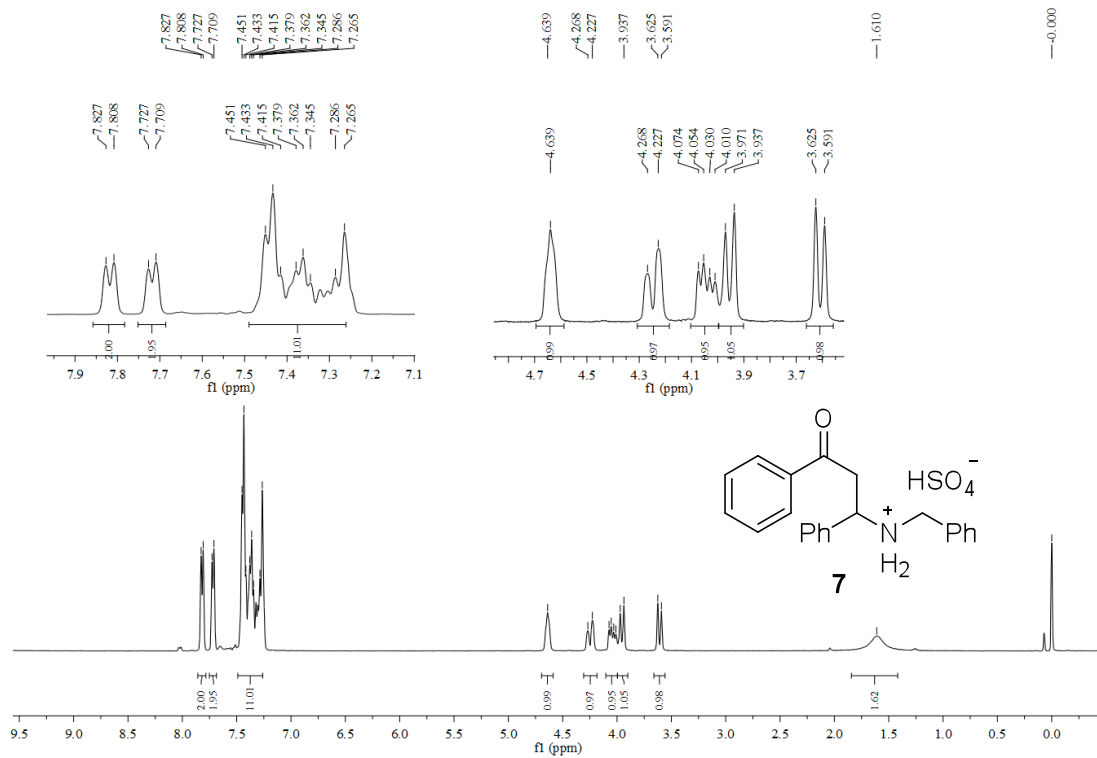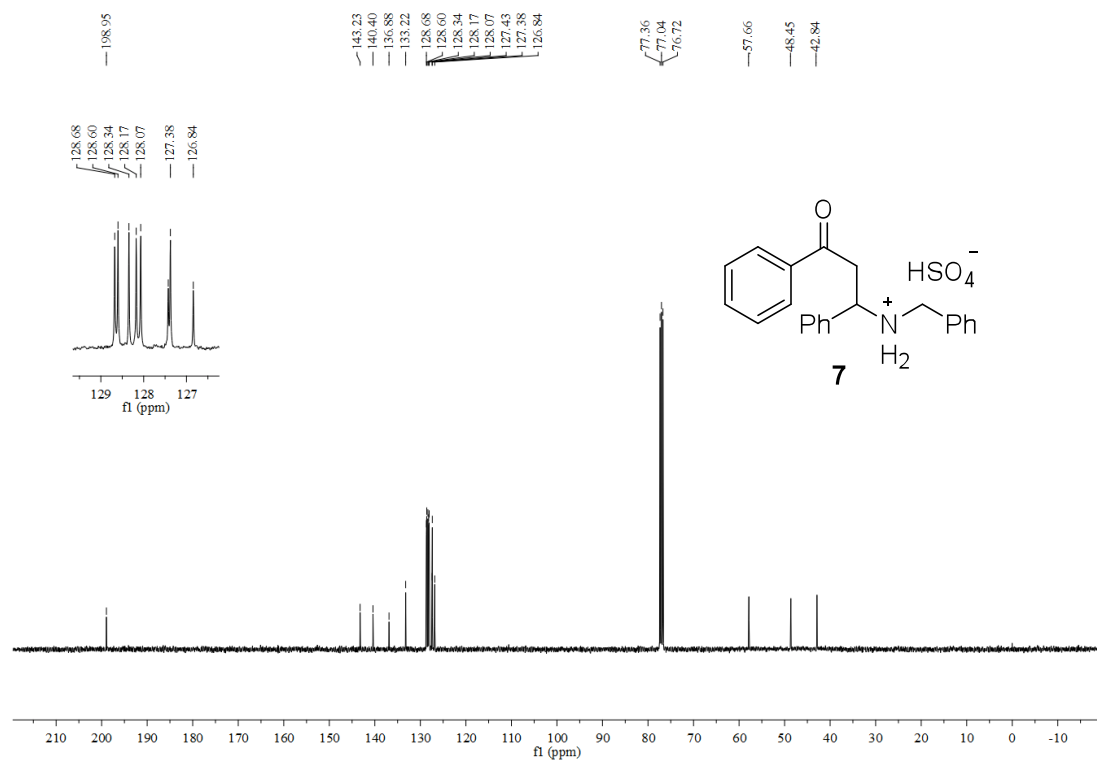

Supplement: c3gc41403e.pdf [file c3gc41403e.pdf]
